# Supplementary material for: Exploring Cancer Survivor Needs and Preferences for Communicating Personalized Cancer Statistics From Registry Data: Qualitative Multimethod Study
Source: JMIR Cancer. 2021 Oct 25;7(4):e25659. doi: 10.2196/25659 (PMC8576563; doi:10.2196/25659)

# Multimedia 3

**Materials:** Screenshots of an interactive version of a tool that communicates personalized cancer statistics from the NCR

**Study 2:** Think-aloud observations

**Authors:** Vromans et al.

# Content

- [Example 1: prostate cancer](#)
  - Survival statistics: Favorable
  - Version: Short and concise tool version
- [Example 2: prostate cancer](#)
  - Survival statistics: Less favorable
  - Version: Long and detailed tool version
- [Example 3: breast cancer](#)
  - Survival statistics: Favorable
  - Version: Long and detailed version
- [Example 4: breast cancer](#)
  - Survival statistics: Less favorable
  - Version: Short and concise version

# Example 1: prostate cancer

- Survival statistic: Favorable
- Version: Short and concise tool version

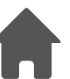

# Prostaatkanker

Wat is...

Onderzoek

Behandeling

Nieuwe

Gevolgen

Niet meer

Wat is...?

Prostaatkanker

Symptomen bij prostaatkanker

Risicofactoren van prostaatkanker

Bevolkingsonderzoek prostaatkanker

Erfelijkheid en prostaatkanker

Patiëntenorganisatie voor prostaatkanker

Overlevingscijfers prostaatkanker

## Overlevingscijfers prostaatkanker

De volgende pagina's geven cijfers over prostaatkanker. U kunt zien hoeveel mensen jaarlijks prostaatkanker krijgen en hoeveel mensen deze ziekte overleven. De statistische berekeningen worden gedaan met de gegevens uit de Nederlandse Kankerregistratie (NKR).

Als u vragen heeft, is het belangrijk om de betreffende pagina te printen en mee te nemen naar het ziekenhuis, zodat u de informatie kunt bespreken met uw arts.

Volgende

Translation:  
**Survival statistics prostate cancer**  
The next pages will show you statistics about prostate cancer. You will see how many men are diagnosed with prostate cancer, and how many of these men will survive prostate cancer. The statistics are based on data from the Netherlands Cancer Registry (NCR).

If you have any questions, you could always print the respective pages and take them with you to the next visit with your doctor, so you can discuss the results with him/her.

# Prostaatkanker

## Wat is...

### Wat is...?

Onderzoek Prostaatkanker >

Behandeling Symptomen bij prostaatkanker >

Nieuwe Risicofactoren van prostaatkanker >

Gevolgen Bevolkingsonderzoek prostaatkanker >

Erfelijkheid en prostaatkanker >

Patiëntenorganisatie voor prostaatkanker >

**Overlevingscijfers prostaatkanker** >

Overige cijfers

1

2

3

### Belangrijk om te weten voordat u verder gaat:

- Het is belangrijk dat u nadenkt over wat u wilt weten. Deze cijfers kunnen 'goed' nieuws bevatten maar ook 'slecht' nieuws. Wat iemand wil weten, verschilt per persoon.
- Alle getallen die wij geven, zijn gebaseerd op het verloop in het verleden. Onder invloed van betere diagnostiek en behandelingen, kunnen overlevingskansen voor huidige en toekomstige patiënten beter zijn dan de cijfers die wij hier tonen.
- Het lijkt soms alsof wij het heel 'precies' weten. Er is echter altijd sprake van onzekerheid. Hoe kleiner de aantallen, hoe groter de onzekerheid over het getal.

Vorige

Volgende

Translation:

### Important to know before you continue:

- It is important that you think about what you want to know. These statistics may contain 'good' or 'bad' news. What someone wants to know, differs per person.
- All statistics that we provide are based on what happened in the past. Given the improvements in terms of diagnosis and treatments, the survival statistics for recently diagnosed and future patients may be better than those statistics that we show here.
- It may seem that we know everything without any uncertainty. However, there is always uncertainty around statistics.

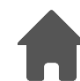

# Prostaatkanker

- Wat is...**
- Onderzoek

Behandeling

Nieuwe

Gevolgen

Niet meer
- Wat is...?

Prostaatkanker

Symptomen bij prostaatkanker

Risicofactoren van prostaatkanker

Bevolkingsonderzoek prostaatkanker

Erfelijkheid en prostaatkanker

Patiëntenorganisatie voor prostaatkanker

**Overlevingscijfers prostaatkanker**

Overige cijfers

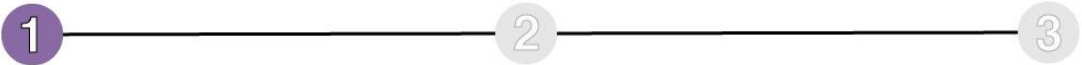

Wilt u liever algemene cijfers zien, of gepersonaliseerde cijfers?

- Algemene cijfers
- Gepersonaliseerde cijfers

Translation:  
Would you like to see generic statistics, or personalized statistics?

# Prostaatkanker

|                  |                                                              |   |
|------------------|--------------------------------------------------------------|---|
| <b>Wat is...</b> | <b>Wat is...?</b>                                            |   |
| Onderzoek        | Prostaat <span>k</span> anker                                | > |
| Behandeling      | Symptomen bij prostaat <span>k</span> anker                  | > |
| Nieuwe           | Risicofactoren van prostaat <span>k</span> anker             | > |
| Gevolgen         | Bevolkingsonderzoek prostaat <span>k</span> anker            | > |
| Niet meer        | Er <span>f</span> elijkheid en prostaat <span>k</span> anker | > |
|                  | Patiëntenorganisatie voor prostaat <span>k</span> anker      | > |
|                  | <b>Overlevingscijfers prostaat<span>k</span>anker</b>        | > |
|                  | Overige cijfers                                              |   |

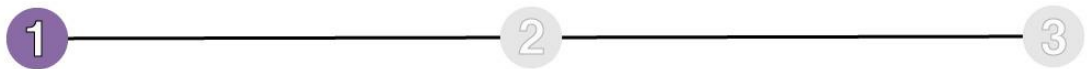

## Persoonlijke gegevens

Wat is uw geslacht?

Man

In welk jaar bent u geboren?

Vorige Volgende

- Translation:
- Personal data**
- What is your gender? (men)
  - What is your year of birth?

# Prostaatkanker

Wat is...

Onderzoek

Behandeling

Nieuwe

Gevolgen

Niet meer

Wat is...?

Prostaatkanker

Symptomen bij prostaatkanker

Risicofactoren van prostaatkanker

Bevolkingsonderzoek prostaatkanker

Erfelijkheid en prostaatkanker

Patiëntenorganisatie voor prostaatkanker

Overlevingscijfers prostaatkanker

Overige cijfers

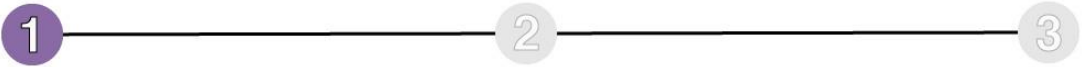

## Persoonlijke gegevens

Wat is uw geslacht?

Man

In welk jaar bent u geboren?

1956  
1955  
1954  
1953  
1952

Vorige Volgende

- Translation:
- Personal data**
- What is your gender? (men)
  - What is your year of birth?

# Prostaatkanker

- Wat is...**
- Onderzoek

Behandeling

Nieuwe

Gevolgen

Niet meer
- Wat is...?

Prostaatkanker

Symptomen bij prostaatkanker

Risicofactoren van prostaatkanker

Bevolkingsonderzoek prostaatkanker

Erfelijkheid en prostaatkanker

Patiëntenorganisatie voor prostaatkanker

**Overlevingscijfers prostaatkanker**

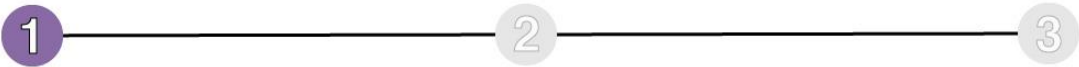

## Persoonlijke gegevens

**Wat is uw geslacht?**

Man

**In welk jaar bent u geboren?**

1954

Vorige Volgende

- Translation:
- Personal data**
- What is your gender? (men)
  - What is your year of birth?

# Prostaatkanker

- Wat is...**
- Onderzoek

Behandeling

Nieuwe

Gevolgen

Niet meer
- Wat is...?

Prostaatkanker

Symptomen bij prostaatkanker

Risicofactoren van prostaatkanker

Bevolkingsonderzoek prostaatkanker

Erfelijkheid en prostaatkanker

Patiëntenorganisatie voor prostaatkanker

**Overlevingscijfers prostaatkanker**

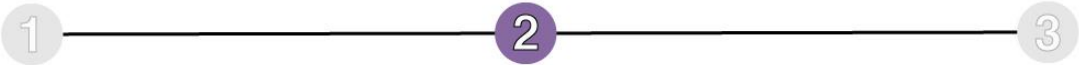

## Gegevens over uw ziekte bij diagnose

**In welk jaar kreeg u de diagnose?**

?

**Wat was uw PSA-waarde bij diagnose?**

?

**Wat was uw Gleason-score bij diagnose?**

?

**Wat was het stadium van de ziekte bij diagnose?**

?

Vorige Toon de cijfers

- Translation:
- Disease-related data**
- Year of diagnosis?
  - PSA-value at diagnosis?
  - Gleason-score at diagnosis?
  - Tumor stage at diagnosis?

# Prostaatkanker

- Wat is...
- Onderzoek

Prostaatkanker

>
- Behandeling

Symptomen bij prostaatkanker

>
- Nieuw onderzoek

Risicofactoren van prostaatkanker

>
- Gevolgen

Bevolkingsonderzoek prostaatkanker

>
- Niet medisch

Erfelijkheid en prostaatkanker

>
- Patiëntenorganisatie voor prostaatkanker

>
- Overlevingscijfers prostaatkanker

>

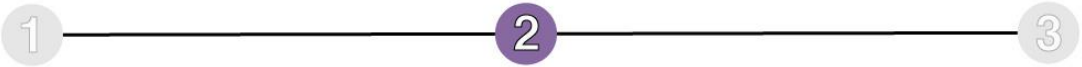

## Gegevens over uw ziekte bij diagnose

In welk jaar kreeg u de diagnose?

▼

Wat was uw PSA-waarde bij diagnose?

▼

Wat was uw Gleason-score bij diagnose?

▼

Wat was het stadium van de ziekte bij diagnose?

▼

**Diagnosejaar**  
Onze statistische berekeningen gaan uit van het jaar van de **eerste diagnose**. Het is belangrijk om die in te vullen. In de Nederlandse Kankerregistratie zijn beperkt gegevens vastgelegd over patiënten na hun diagnose. We weten wel wanneer iemand overlijdt en waaraan diegenen zijn overleden.

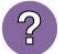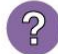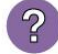

Vorige

Toon de cijfers

Translation:  
Our calculations are based on the first cancer diagnosis. It is important to fill out this one, because the Netherlands Cancer Registry contains limited data of patients after their diagnosis. However, the NCR does know when a patient died (and its cause).

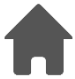

# Prostaatkanker

- Wat is...**
- Onderzoek

Behandeling

Nieuwe

Gevolgen

Niet meer
- Wat is...?

Prostaatkanker

Symptomen bij prostaatkanker

Risicofactoren van prostaatkanker

Bevolkingsonderzoek prostaatkanker

Erfelijkheid en prostaatkanker

Patiëntenorganisatie voor prostaatkanker

Overlevingscijfers prostaatkanker

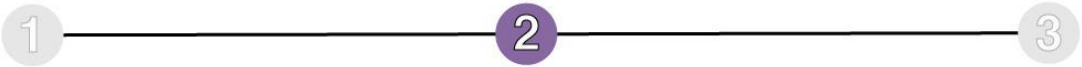

## Gegevens over uw ziekte bij diagnose

In welk jaar kreeg u de diagnose?

Weet ik niet

2019

2018

2017

2016

2015

?

?

?

?

?

ose?

Vorige Toon de cijfers

Translation:  
Disease-related data  
• Year of diagnosis (I don't know, 2019, 2018, etc.)

# Prostaatkanker

Wat is...

Onderzoek

Behandeling

Nieuwe

Gevolgen

Niet meer

Overlevingscijfers prostaatkanker

Wat is...?

Prostaatkanker

Symptomen bij prostaatkanker

Risicofactoren van prostaatkanker

Bevolkingsonderzoek prostaatkanker

Erfelijkheid en prostaatkanker

Patiëntenorganisatie voor prostaatkanker

Overlevingscijfers prostaatkanker

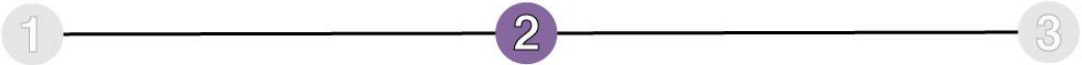

## Gegevens over uw ziekte bij diagnose

In welk jaar kreeg u de diagnose?

2016

?

Wat was uw PSA-waarde bij diagnose?

?

Wat was uw Gleason-score bij diagnose?

?

Wat was het stadium van de ziekte bij diagnose?

?

Translation:  
**Disease-related data**

- Year of diagnosis? (2016)
- PSA-value at diagnosis?
- Gleason-score at diagnosis?
- Tumor stage at diagnosis?

# Prostaatkanker

- Wat is...
- Onderzoek

Prostaatkanker

>
- Behandeling

Symptomen bij prostaatkanker

>
- Nieuwe

Risicofactoren van prostaatkanker

>
- Gevolgen

Bevolkingsonderzoek prostaatkanker

>
- Niet meer

Erfelijkheid en prostaatkanker

>
- Patiëntenorganisatie voor prostaatkanker

>
- Overlevingscijfers prostaatkanker

>

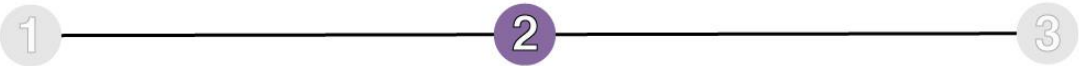

## Gegevens over uw ziekte bij diagnose

In welk jaar kreeg u de diagnose?

2016

▼

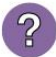

Wat was uw PSA-waarde bij diagnose?

▼

Wat was uw Gleason-score bij diagnose?

▼

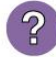

Wat was het stadium van de ziekte bij diagnose?

▼

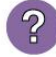

**Uitleg PSA-waarde**  
PSA is de afkorting van prostaat specifiek antigeen. Het is een eiwit dat vooral in de prostaat wordt gemaakt. Normaal komt PSA in kleine hoeveelheden voor in uw bloed.

Vorige

Toon de cijfers

Translation:  
**Explanation PSA-value:** PSA stands for Prostate-specific antigen. This is a protein produced by normal, as well as malignant, cells of the prostate gland.

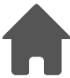

# Prostaatkanker

- Wat is...
- Onderzoek

Prostaatkanker

>
- Behandeling

Symptomen bij prostaatkanker

>
- Nieuwe

Risicofactoren van prostaatkanker

>
- Gevolgen

Bevolkingsonderzoek prostaatkanker

>
- Niet meer

Erfelijkheid en prostaatkanker

>
- Patiëntenorganisatie voor prostaatkanker

>
- Overlevingscijfers prostaatkanker

>

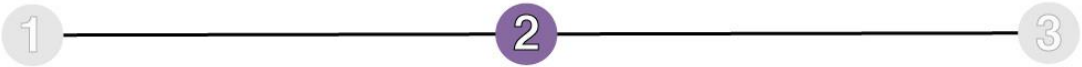

## Gegevens over uw ziekte bij diagnose

In welk jaar kreeg u de diagnose?

2016

▼

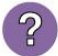

Wat was uw PSA-waarde bij diagnose?

▼

Lager dan 10

Tussen de 10 en 20

Hoger dan 20

Weet ik niet

▼

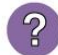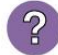

ose?

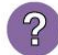

Vorige

Toon de cijfers

Translation:

Disease-related data

- Year of diagnosis? (2016)
- PSA-value at diagnosis? (Lower than 10, Between 10 and 20, Higher than 20, I don't know)
- Gleason-score at diagnosis?
- Tumor stage at diagnosis?

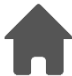

# Prostaatkanker

## Wat is...

Onderzoek Prostaatkanker >

Behandeling Symptomen bij prostaatkanker >

Nieuwe Risicofactoren van prostaatkanker >

Gevolgen Bevolkingsonderzoek prostaatkanker >

Niet met Erfelijkheid en prostaatkanker >

Patiëntenorganisatie voor prostaatkanker >

**Overlevingscijfers prostaatkanker** >

Overlevingscijfers

1

2

3

## Gegevens over uw ziekte bij diagnose

In welk jaar kreeg u de diagnose?

2016

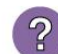

Wat was uw PSA-waarde bij diagnose?

Lager dan 10

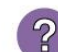

Wat was uw Gleason-score bij diagnose?

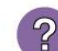

Wat was het stadium van de ziekte bij diagnose?

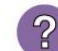

Vorige

Toon de cijfers

Translation:

### Disease-related data

- Year of diagnosis? (2016)
- PSA-value at diagnosis? (Lower than 10)
- Gleason-score at diagnosis?
- Tumor stage at diagnosis?

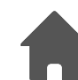

# Prostaatkanker

- Wat is...
- Onderzoek > Prostaatkanker
- Behandeling > Symptomen bij prostaatkanker
- Nieuw onderzoek > Risicofactoren van prostaatkanker
- Gevolgen > Bevolkingsonderzoek prostaatkanker
- Niet meer > Erfelijkheid en prostaatkanker
- Patiëntenorganisatie voor prostaatkanker
- Overlevingscijfers prostaatkanker >

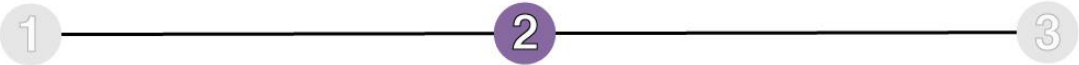

## Gegevens over uw ziekte bij diagnose

In welk jaar kreeg u de diagnose?

2016

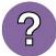

Wat was uw PSA-waarde bij diagnose?

Lager dan 10

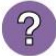

Wat was uw Gleason-score bij diagnose?

Wat was het stadium van de ziekte bij diagnose?

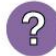

**Gleason-score**  
Hoe agressief de kankercellen zijn, wordt grade-  
ring genoemd. Bij prostaatkanker wordt dit met de  
Gleason-score uitgedrukt. Deze score is een getal  
tussen 6 en 10. Hoe minder de kankercellen lijken  
op normaal prostaatweefsel, hoe hoger dit getal.  
En hoe kwaadaardiger de tumor.

Vorige Toon de cijfers

Translation:

**Gleason-score:** The tumor grade says something about the aggressiveness of the tumor. For prostate cancer, this is expressed by means of the Gleason-score. This score is a number between 6 and 10. Cancer cells that deviate from healthy cells receive a high score. The higher this score, the more aggressive the tumor is.

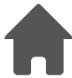

# Prostaatkanker

- Wat is...
- Onderzoek

Behandeling

Nieuwe

Gevolgen

Niet meer
- Wat is...?

Prostaatkanker

Symptomen bij prostaatkanker

Risicofactoren van prostaatkanker

Bevolkingsonderzoek prostaatkanker

Erfelijkheid en prostaatkanker

Patiëntenorganisatie voor prostaatkanker

Overlevingscijfers prostaatkanker

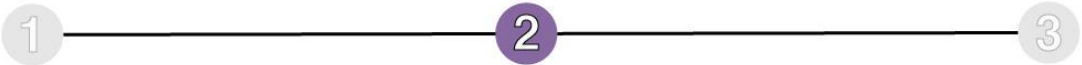

## Gegevens over uw ziekte bij diagnose

In welk jaar kreeg u de diagnose?

2016

▼

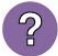

Wat was uw PSA-waarde bij diagnose?

Lager dan 10

▼

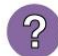

Wat was uw Gleason-score bij diagnose?

▼

Lager dan 7

7

Hoger dan 7

Weet ik niet

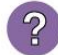

ose?

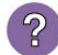

Vorige

Toon de cijfers

- Translation:
- Disease-related data**
- Year of diagnosis? (2016)
  - PSA-value at diagnosis? (Lower than 10)
  - Gleason-score at diagnosis? (Lower than 7, 7, Higher than 7, I don't know)
  - Tumor stage at diagnosis?

# Prostaatkanker

## Wat is...

### Wat is...?

Onderzoek Prostaatkanker >

Behandeling Symptomen bij prostaatkanker >

Nieuwe Risicofactoren van prostaatkanker >

Gevolgen Bevolkingsonderzoek prostaatkanker >

Erfelijkheid en prostaatkanker >

Patiëntenorganisatie voor prostaatkanker >

**Overlevingscijfers prostaatkanker** >

Overige cijfers

1

2

3

## Gegevens over uw ziekte bij diagnose

In welk jaar kreeg u de diagnose?

2016

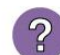

Wat was uw PSA-waarde bij diagnose?

Lager dan 10

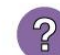

Wat was uw Gleason-score bij diagnose?

Lager dan 7

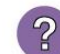

Wat was het stadium van de ziekte bij diagnose?

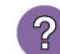

Vorige

Toon de cijfers

Translation:

### Disease-related data

- Year of diagnosis? (2016)
- PSA-value at diagnosis? (Lower than 10)
- Gleason-score at diagnosis? (Lower than 7)
- Tumor stage at diagnosis?



# Prostaatkanker

- Wat is...

Wat is...?
- Onderzoek

Prostaatkanker

>
- Behandeling

Symptomen bij prostaatkanker

>
- Nieuwe

Risicofactoren van prostaatkanker

>
- Gevolgen

Bevolkingsonderzoek prostaatkanker

>
- Niet meer

Erfelijkheid en prostaatkanker

>
- Patiëntenorganisatie voor prostaatkanker

>
- Overlevingscijfers prostaatkanker

>

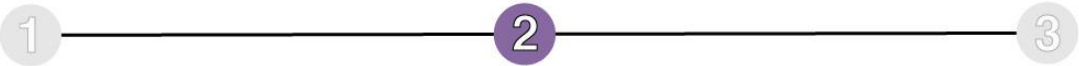

## Gegevens over uw ziekte bij diagnose

In welk jaar kreeg u de diagnose?

2016

▼

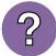

Wat was uw PSA-waarde bij diagnose?

Lager dan 10

▼

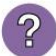

Wat was uw Gleason-score bij diagnose?

Lager dan 7

▼

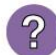

Wat was het stadium van de ziekte bij diagnose?

▼

**Stadium**  
Het stadium geeft aan hoever de ziekte zich in het lichaam heeft uitgebreid. De arts stelt het stadium vast. Bij prostaatkanker zijn er vier stadia

**Stadium 1:** De tumor bevindt zich alleen in de prostaat. De kanker kan niet worden gevoeld tijdens een digitaal rectaal onderzoek en is niet zichtbaar op röntgenopnamen.

**Stadium 2:** De tumor is verder ontwikkeld dan in stadium 1, maar (nog) niet buiten de prostaat uitgezaaid.

**Stadium 3:** De tumor is voorbij de buitenste laag van de prostaat naar nabijgelegen weefsel uitgezaaid. De kanker kan ook zijn uitgezaaid naar de zaadblaasjes.

**Stadium 4:** Prostaatkanker met aangetoonde uitzaaiingen in andere delen van het lichaam.

- Vorige
- Toon de cijfers

Translation:

The tumor stage says something about how far the cancer has progressed. The doctor will determine the tumor stage. For prostate cancer, there are four stages.

**Stage 1:** the tumor is still within the prostate. The doctor cannot feel the tumor during a rectal exam, or the tumor is not visible on a scan.

**Stage 2:** the tumor remains confined to the prostate gland, but it has not spread outside the prostate.

**Stage 3:** the tumor is locally advanced. The tumor has progressed and is more likely to grow and spread.

**Stage 4:** the tumor has spread to lymph nodes or to other parts of the body.

# Prostaatkanker

- Wat is...**
- Onderzoek

Behandeling

Nieuwe

Gevolgen

Niet meer
- Wat is...?

Prostaatkanker

Symptomen bij prostaatkanker

Risicofactoren van prostaatkanker

Bevolkingsonderzoek prostaatkanker

Erfelijkheid en prostaatkanker

Patiëntenorganisatie voor prostaatkanker

Overlevingscijfers prostaatkanker

Overige cijfers

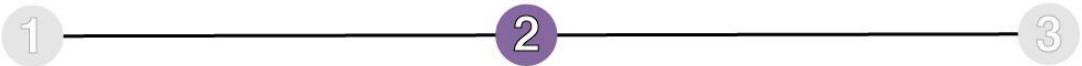

## Gegevens over uw ziekte bij diagnose

2016

?

Wat was uw PSA-waarde bij diagnose?

Lager dan 10

?

Wat was uw Gleason-score bij diagnose?

Lager dan 7

?

Wat was het stadium van de ziekte bij diagnose?

?

Stadium I

Stadium II

Stadium III

Stadium IV

Weet ik niet

Vorige Toon de cijfers

- Translation:
- Disease-related data**
- Year of diagnosis? (2016)
  - PSA-value at diagnosis? (Lower than 10)
  - Gleason-score at diagnosis? (Lower than 7)
  - Tumor stage at diagnosis? (Stage I, Stage II, Stage III, Stage IV, I don't know)

# Prostaatkanker

## Wat is...

### Wat is...?

Onderzoek Prostaatkanker >

Behandeling Symptomen bij prostaatkanker >

Nieuwe diagnose Risicofactoren van prostaatkanker >

Gevolgen van prostaatkanker Bevolkingsonderzoek prostaatkanker >

Erfelijkheid en prostaatkanker >

Patiëntenorganisatie voor prostaatkanker >

Overlevingscijfers prostaatkanker >

Overige cijfers

1

2

3

## Gegevens over uw ziekte bij diagnose

2016

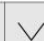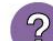

Wat was uw PSA-waarde bij diagnose?

Lager dan 10

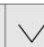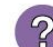

Wat was uw Gleason-score bij diagnose?

Lager dan 7

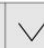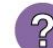

Wat was het stadium van de ziekte bij diagnose?

Stadium I

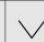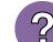

Vorige

Toon de cijfers

Translation:

### Disease-related data

- Year of diagnosis? (2016)
- PSA-value at diagnosis? (Lower than 10)
- Gleason-score at diagnosis? (Lower than 7)
- Tumor stage at diagnosis? (Stage I)



# Prostaatcancer

## Wat is...

### Wat is...?

- Onderzoek Prostaatcancer >
- Behandeling Symptomen bij prostaatcancer >
- Nieuwe Risicofactoren van prostaatcancer >
- Gevolgen Prostaatcancer >
- Niet meten Bevolkingsonderzoek prostaatcancer >
- Erfelijkheid en prostaatcancer >
- Patiëntenorganisatie voor prostaatcancer >
- Overlevingscijfers prostaatcancer >**
- Overige cijfers

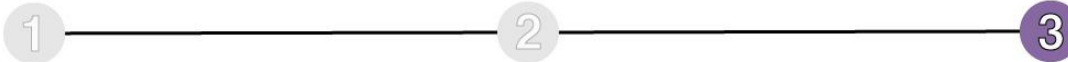

## Resultaten

Op deze pagina ziet u cijfers over prostaatcancer. De cijfers die wij tonen, zijn gebaseerd op patiënten met de volgende kenmerken bij diagnose:

|                          |                                 |                                   |
|--------------------------|---------------------------------|-----------------------------------|
| Geslacht: <b>Man</b>     | Diagnosejaar: <b>2016</b>       | Gleason-score: <b>Lager dan 7</b> |
| Geboortjaar: <b>1954</b> | PSA-waarde: <b>Lager dan 10</b> | Stadium: <b>Stadium I</b>         |

### Incidentiecijfers prostaatcancer

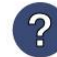

In 2016 kregen in totaal 11.114 mannen de diagnose prostaatcancer. In 2016 kregen 81 mannen de diagnose prostaatcancer stadium I (PSA-waarde kleiner dan 10, en Gleason-score lager dan 7) op 65-jarige leeftijd.

### Overlevingscijfers prostaatcancer

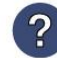

Het is belangrijk dat u nadenkt over wat u wil weten. Deze cijfers kunnen 'goed' nieuws bevatten maar ook 'slecht' nieuws. Wat iemand wil weten, verschilt per persoon.

Vorige

Translation:

### Results

On this page, you will see statistics about prostate cancer. The statistics that we show are based on patients with the following characteristics:

*Incidence rates prostate cancer:* In 2016, in total 11.114 men were diagnosed with prostate cancer. In 2016, 81 men like you were diagnosed with prostate cancer stage I (PSA-value lower than 10, Gleason-score lower than 7) aged 65 years old.

*Survival statistics prostate cancer*

It is important that you think about what you want to know. These statistics may contain 'good' or 'bad' new. . What someone wants to know, differs per person.

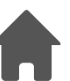

# Prostaatkanker

- Wat is...
- Onderzoek > Prostaatkanker
- Behandeling > Symptomen bij prostaatkanker
- Nieuwe > Risicofactoren van prostaatkanker
- Gevolgen > Bevolkingsonderzoek prostaatkanker
- Niet meer > Erfelijkheid en prostaatkanker
- > Patiëntenorganisatie voor prostaatkanker
- Overlevingscijfers prostaatkanker >

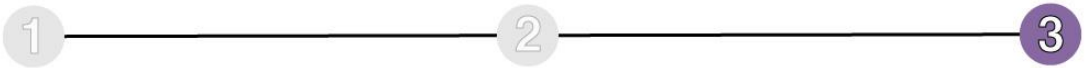

## Resultaten

Op deze pagina ziet u cijfers over prostaatkanker. De cijfers die wij tonen, zijn gebaseerd op patiënten met de volgende kenmerken bij diagnose:

|                         |                                 |                                   |
|-------------------------|---------------------------------|-----------------------------------|
| Geslacht: <b>Man</b>    | Diagnosejaar: <b>2016</b>       | Gleason-score: <b>Lager dan 7</b> |
| Geboortear: <b>1954</b> | PSA-waarde: <b>Lager dan 10</b> | Stadium: <b>Stadium I</b>         |

### Incidentiecijfers prostaatkanker

Met **incidentie** bedoelen we het aantal nieuwe gevallen met kanker in een bepaalde periode. Bij kanker geven we het aantal mensen dat in een bepaald jaar heeft gehoord dat ze kanker hebben.

In **2016** kregen in totaal 11.114 mannen de diagnose prostaatkanker. In 2016 kregen 81 mannen de diagnose prostaatkanker stadium I (PSA-waarde kleiner dan 10, en Gleason-score lager dan 7).

Het is belangrijk dat u nadenkt over wat u wil weten. Deze cijfers kunnen ‘goed’ nieuws bevatten maar ook ‘slecht’ nieuws. Wat iemand wil weten, verschilt per persoon.

Vorige

Translation:

With incidence rate we mean the number of new cancers of cancer occurring in a specified population in a certain period (typically in a specific year).

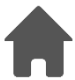

# Prostaatkanker

- Wat is...

Wat is...?
- Onderzoek

Prostaatkanker

>
- Behandeling

Symptomen bij prostaatkanker

>
- Nieuw onderzoek

Risicofactoren van prostaatkanker

>
- Gevolgen

Bevolkingsonderzoek prostaatkanker

>
- Niet meer

Erfelijkheid en prostaatkanker

>
- Patiëntenorganisatie voor prostaatkanker

>
- Overlevingscijfers prostaatkanker

>

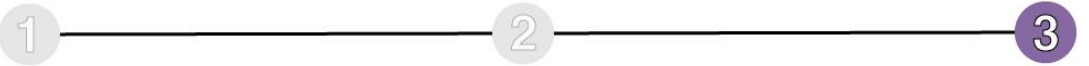

## Resultaten

Op deze pagina ziet u cijfers over prostaatkanker. De cijfers die wij tonen, zijn gebaseerd op patiënten met de volgende kenmerken bij diagnose:

|                                           |                                 |                                   |
|-------------------------------------------|---------------------------------|-----------------------------------|
| Geslacht: <b>Man</b>                      | Diagnosejaar: <b>2016</b>       | Gleason-score: <b>Lager dan 7</b> |
| Geboort <span>ee</span> jaar: <b>1954</b> | PSA-waarde: <b>Lager dan 10</b> | Stadium: <b>Stadium I</b>         |

Incidentiecijfers prostaatkanker

?

In 2016 kregen in totaal 11.114 mannen de diagnose prostaatkanker. In 2016 kregen 81 mannen de diagnose prostaatkanker stadium I (PSA-waarde kleiner dan 10, en Gleason-score lager dan 7) op 65-jarige leeftijd.

Overlevingscijfers prostaatkanker

?

Het is belangrijk dat u nadenkt over wat u wil weten. Deze cijfers kunnen ‘goed’ nieuws bevatten maar ook ‘slecht’ nieuws. Wat iemand wil weten, verschilt per persoon.

Vorige

Translation:

### Results

On this page, you will see statistics about prostate cancer. The statistics that we show are based on patients with the following characteristics:

*Incidence rates prostate cancer:* In 2016, in total 11.114 men were diagnosed with prostate cancer. In 2016, 81 men like you were diagnosed with prostate cancer stage I (PSA-value lower than 10, Gleason-score lower than 7) aged 65 years old.

*Survival statistics prostate cancer*

It is important that you think about what you want to know. These statistics may contain ‘good’ or ‘bad’ new. . What someone wants to know, differs per person.

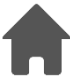

# Prostaatkanker

- Wat is...
  - Wat is...?
  - Onderzoek Prostaatkanker
  - Behandeling Symptomen bij prostaatkanker
  - Nieuwe Risicofactoren van prostaatkanker
  - Gevolgen Prostaatkanker
  - Niet meer Bevolkingsonderzoek prostaatkanker
  - Erfelijkheid en prostaatkanker
  - Patiëntenorganisatie voor prostaatkanker
  - Overlevingscijfers prostaatkanker

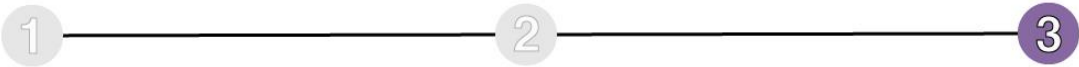

## Resultaten

### Overlevingscijfers prostaatkanker ?

**Algemene cijfer:** 5 jaar na diagnose was ongeveer **89 procent** van de prostaatkanker patiënten nog in leven (89 van de 100 mannen).

**Gepersonaliseerd cijfer:** 5 jaar na diagnose was ongeveer **94 procent** van de patiënten met bovengenoemde kenmerken nog in leven (94 van de 100 mannen).

Het is belangrijk om te weten dat uw vooruitzichten nog steeds beter of slechter kunnen zijn dan de vooruitzichten voor deze specifieke groep. Bespreek uw vooruitzichten met uw arts.

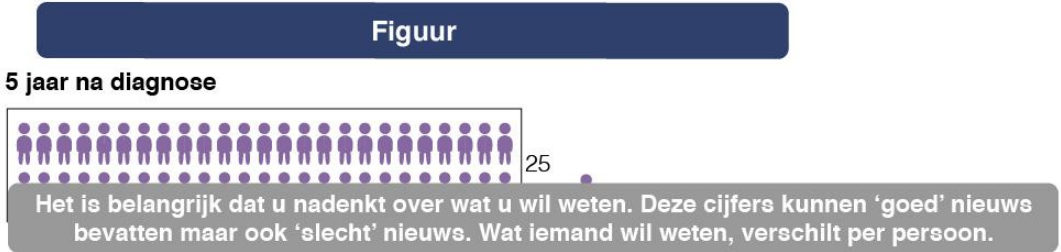

Vorige

Translation:

**Survival statistics prostate cancer**

*Generic statistic:* 5 years after diagnosis, about 89 percent of these patients with prostate cancer are alive (89 out of 100 men).

*Personalized statistic:* 5 years after diagnosis, about **94 percent** of these patients like you with prostate cancer are alive (89 out of 100 men).

It is important to know that your prognosis may be better or worse than the prognosis of this specific group of patients. Please discuss your prognostic situation with your doctor.



# Prostaatkanker

## Wat is...

### Wat is...?

Onderzoek Prostaatkanker >

Behandeling Symptomen bij prostaatkanker >

Nieuwe Risicofactoren van prostaatkanker >

Gevolgen Bevolkingsonderzoek prostaatkanker >

Erfelijkheid en prostaatkanker >

Patiëntenorganisatie voor prostaatkanker >

Overlevingscijfers prostaatkanker >

Overige cijfers

1

2

3

## Resultaten

### Overlevingscijfers prostaatkanker

Met **overleving** bedoelen we hoeveel mensen met een bepaalde vorm van kanker na een bepaalde periode nog in leven zijn. In dit geval laten we zien hoeveel mannen met de diagnose prostaatkanker 5 jaar na diagnose nog in leven zijn.

Om betrouwbare getallen te geven, moet er gerekend worden met grote aantallen patiënten die in het verleden prostaatkanker hebben gehad. De cijfers die wij hier tonen zullen gebaseerd zijn op patiënten met de bovengenoemde kenmerken die tussen 2012 en 2017 de diagnose prostaatkanker kregen.

**Algemene cijfer:** 5 jaar na diagnose was ongeveer **89 procent** van de prostaatkanker patiënten nog in leven (89 van de 100 mannen).

**Gepersonaliseerd cijfer:** 5 jaar na diagnose was ongeveer **94 procent** van de patiënten met bovengenoemde kenmerken nog in leven (94 van de 100 mannen).

Het is belangrijk dat u nadenkt over wat u wil weten. Deze cijfers kunnen 'goed' nieuws bevatten maar ook 'slecht' nieuws. Wat iemand wil weten, verschilt per persoon.

Vorige

### Translation:

With survival we mean the percentage of people with cancer still alive after a particular amount of time. Survival statistics for cancer are usually written as 5 year survival. In order to provide you with reliable statistics we need to perform statistics on a large group of patients that have been diagnosed with prostate cancer in the past. The statistics that we show here are performed on data from patients diagnosed between 2012 and 2017.



# Prostaatkanker

- Wat is...
  - Wat is...?
  - Onderzoek Prostaatkanker
  - Behandeling Symptomen bij prostaatkanker
  - Nieuwe Risicofactoren van prostaatkanker
  - Gevolgen Bevolkingsonderzoek prostaatkanker
  - Niet meer Erfelijkheid en prostaatkanker
  - Patiëntenorganisatie voor prostaatkanker
  - Overlevingscijfers prostaatkanker



## Resultaten

### Overlevingscijfers prostaatkanker ?

**Algemene cijfer:** 5 jaar na diagnose was ongeveer **89 procent** van de prostaatkanker patiënten nog in leven (89 van de 100 mannen).

**Gepersonaliseerd cijfer:** 5 jaar na diagnose was ongeveer **94 procent** van de patiënten met bovengenoemde kenmerken nog in leven (94 van de 100 mannen).

Het is belangrijk om te weten dat uw vooruitzichten nog steeds beter of slechter kunnen zijn dan de vooruitzichten voor deze specifieke groep. Bespreek uw vooruitzichten met uw arts.



Vorige

Translation:

Survival statistics prostate cancer

Generic statistic: 5 years after diagnosis, about **89 percent** of these patients with prostate cancer are alive (89 out of 100 men).

Personalized statistic: 5 years after diagnosis, about **94 percent** of these patients like you with prostate cancer are alive (94 out of 100 men).

It is important to know that your prognosis may be better or worse than the prognosis of this specific group of patients. Please discuss your prognostic situation with your doctor.

# Prostaatkanker

- Wat is...? **Wat is...?**
- Onderzoek Prostaatkanker
- Behandeling Symptomen bij prostaatkanker
- Nieuwe Risicofactoren van prostaatkanker
- Gevolgen Bevolkingsonderzoek prostaatkanker
- Niet meer Erfelijkheid en prostaatkanker
- Patiëntenorganisatie voor prostaatkanker
- Overlevingscijfers prostaatkanker**



## Resultaten

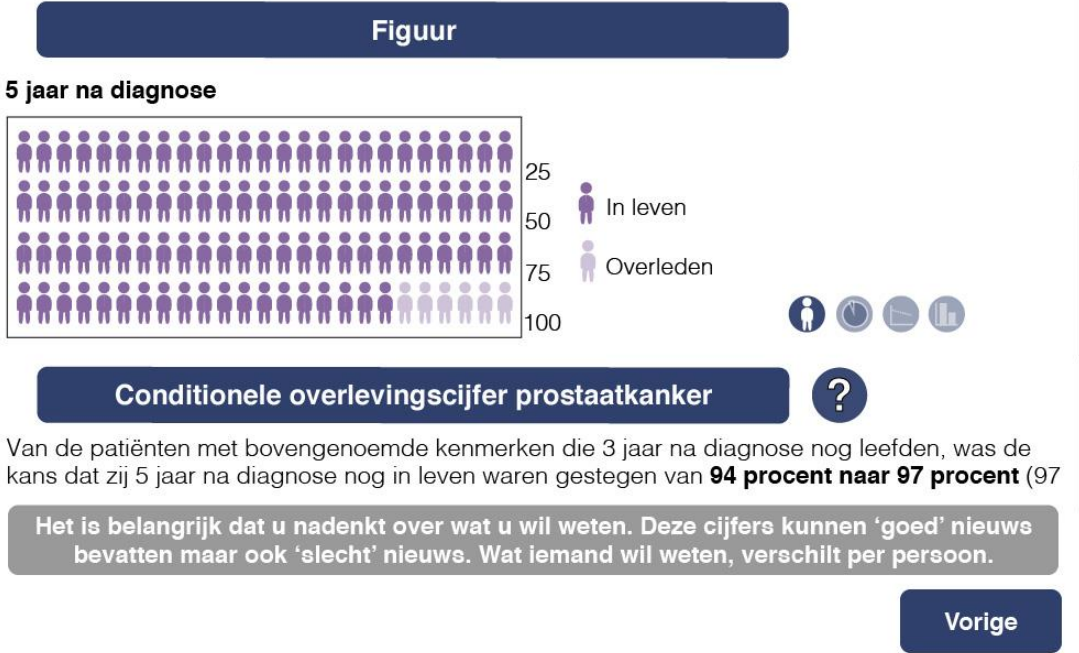

Translation:  
**Conditional survival statistics prostate cancer**  
Of those patients like you who were still alive 3 years after diagnosis, the chance that they would still be alive 5 years after diagnosis increased from **94 percent to 97 percent** (97 out of 100 men).

# Prostaatkanker

## Wat is...

### Wat is...?

Onderzoek Prostaatkanker >

Behandeling Symptomen bij prostaatkanker >

Nieuwe Risicofactoren van prostaatkanker >

Gevolgen Bevolkingsonderzoek prostaatkanker >

Erfelijkheid en prostaatkanker >

Patiëntenorganisatie voor prostaatkanker >

Overlevingscijfers prostaatkanker >

Overige cijfers

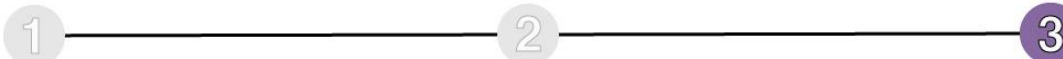

## Resultaten

### Figuur

5 jaar na diagnose

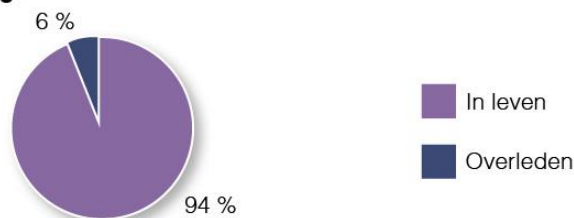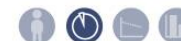

### Conditionele overlevingscijfer prostaatkanker

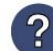

Van de patiënten met bovengenoemde kenmerken die 3 jaar na diagnose nog leefden, was de kans dat zij 5 jaar na diagnose nog in leven waren gestegen van **94 procent naar 97 procent** (97

Het is belangrijk dat u nadenkt over wat u wil weten. Deze cijfers kunnen 'goed' nieuws bevatten maar ook 'slecht' nieuws. Wat iemand wil weten, verschilt per persoon.

Vorige

Translation:

### Conditional survival statistics prostate cancer

Of those patients like you who were still alive 3 years after diagnosis, the chance that they would still be alive 5 years after diagnosis increased from **94 percent to 97 percent** (97 out of 100 men).



# Prostaatkanker

- Wat is...

Wat is...?
- Onderzoek

Prostaatkanker

>
- Behandeling

Symptomen bij prostaatkanker

>
- Nieuw onderzoek

Risicofactoren van prostaatkanker

>
- Gevolgen

Bevolkingsonderzoek prostaatkanker

>
- Niet medisch

Erfelijkheid en prostaatkanker

>
- Patiëntenorganisatie voor prostaatkanker

>
- Overlevingscijfers prostaatkanker

>

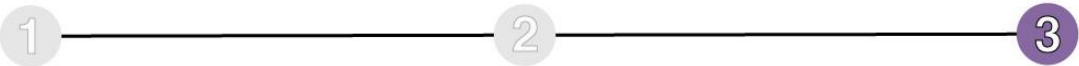

## Resultaten

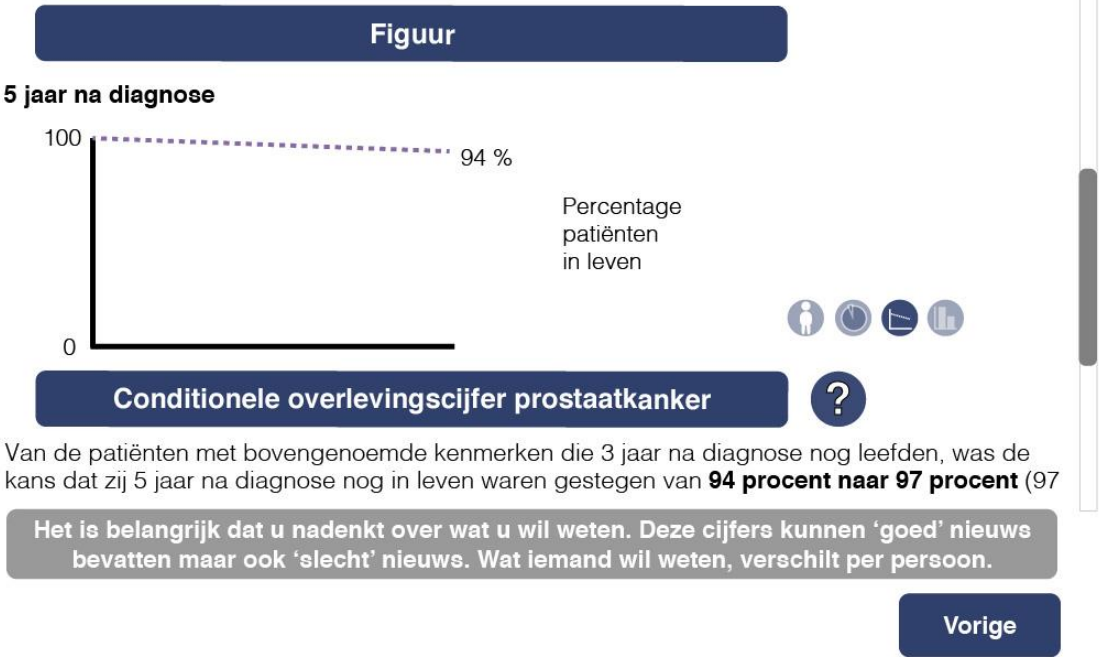

Translation:

### Conditional survival statistics prostate cancer

Of those patients like you who were still alive 3 years after diagnosis, the chance that they would still be alive 5 years after diagnosis increased from **94 percent to 97 percent** (97 out of 100 men).



# Prostaatkanker

- Wat is... Wat is...?
- Onderzoek Prostaatkanker >
- Behandeling Symptomen bij prostaatkanker >
- Nieuwe Risicofactoren van prostaatkanker >
- Gevolgen Bevolkingsonderzoek prostaatkanker >
- Erfelijkheid en prostaatkanker >
- Patiëntenorganisatie voor prostaatkanker >
- Overlevingscijfers prostaatkanker >

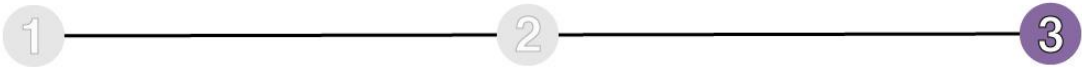

## Resultaten

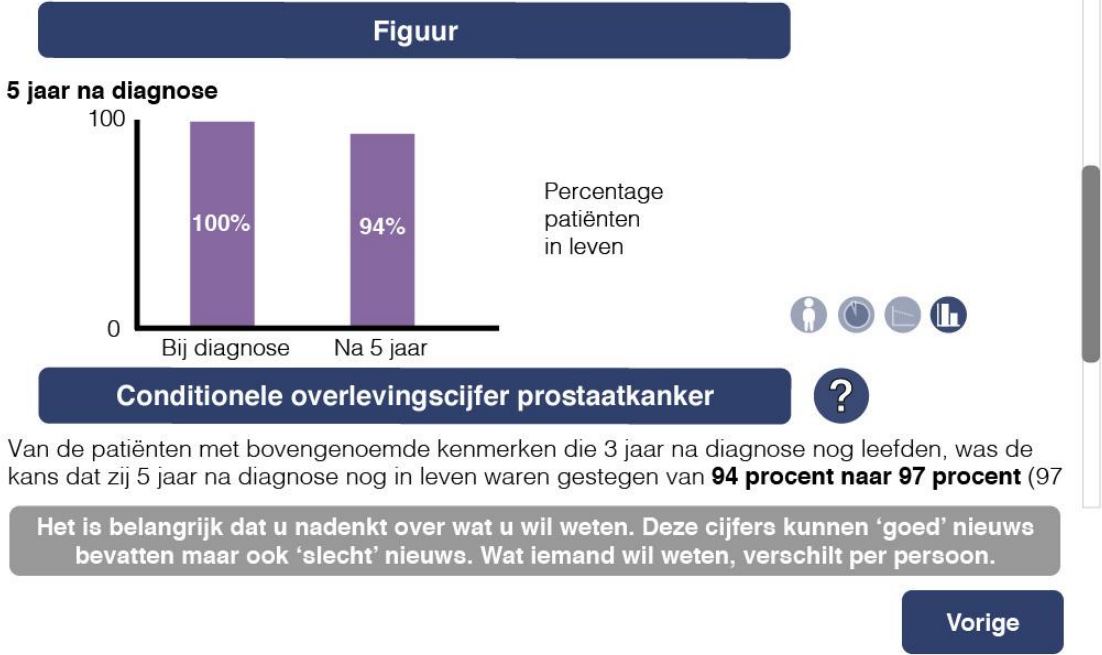

Translation:

**Conditional survival statistics prostate cancer**

Of those patients like you who were still alive 3 years after diagnosis, the chance that they would still be alive 5 years after diagnosis increased from **94 percent to 97 percent** (97 out of 100 men).

# Prostaatkanker

## Wat is...

### Wat is...?

Onderzoek Prostaatkanker >

Behandeling Symptomen bij prostaatkanker >

Nieuwe Risicofactoren van prostaatkanker >

Gevolgen Bevolkingsonderzoek prostaatkanker >

Erfelijkheid en prostaatkanker >

Patiëntenorganisatie voor prostaatkanker >

Overlevingscijfers prostaatkanker >

Overige cijfers

1

2

3

## Resultaten

### Conditionele overlevingscijfer prostaatkanker

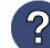

Van de patiënten met bovengenoemde kenmerken die 3 jaar na diagnose nog leefden, was de kans dat zij 5 jaar na diagnose nog in leven waren **gestegen van 94 procent naar 97 procent** (97 van de 100 mannen).

### Toelichting op de cijfers

Bovenstaande cijfers zijn afkomstig uit de Nederlandse Kankerregistratie (NKR). Deze database bevat betrouwbare en objectieve gegevens over het voorkomen en de overleving van alle diagnoses kanker in Nederland. Het Integraal Kankercentrum Nederland (IKNL) beheert deze database.

Bovenstaande cijfers zijn tot en met 2017. Meer recente cijfers zijn op dit moment niet beschikbaar. De veranderingen per jaar zijn meestal gering. Bovenstaande cijfers kunnen een indruk geven voor latere jaren.

Het is belangrijk dat u nadenkt over wat u wil weten. Deze cijfers kunnen 'goed' nieuws bevatten maar ook 'slecht' nieuws. Wat iemand wil weten, verschilt per persoon.

Vorige

Translation:

### About the statistics

The statistics that we show are based on data from the Netherlands Cancer Registry (NCR). This database contains reliable and objective data about the prevalence and survival of all cancer patients in the Netherlands. The Netherlands Comprehensive Cancer Organisation hosts this database.

The statistics that we showed are until 2017. More recent statistics are currently not available. However, annual changes are typically limited. The statistics provided here may therefore give an impression for future years.

# Prostaatcancer

## Wat is...

### Wat is...?

Onderzoek Prostaatcancer >

Behandeling Symptomen bij prostaatcancer >

Nieuwe Risicofactoren van prostaatcancer >

Gevolgen Bevolkingsonderzoek prostaatcancer >

Erfelijkheid en prostaatcancer >

Patiëntenorganisatie voor prostaatcancer >

Overlevingscijfers prostaatcancer >

Overige cijfers

1

2

3

## Resultaten

### Conditionele overlevingscijfer prostaatcancer

Veel kankerpatiënten die hun ziekte reeds enige tijd hebben overleefd, willen graag weten wat hun vooruitzichten zijn gelet op het feit dat ze nog (steeds) in leven zijn. Dit wordt 'conditionele overleving' genoemd. De overlevingscijfers worden vaak beter met ieder jaar dat de patiënt overleeft.

Van de patiënten met bovengenoemde kenmerken die 3 jaar na diagnose nog leefden, was de kans dat zij 5 jaar na diagnose nog in leven waren **gestegen van 94 procent naar 97 procent** (97 van de 100 mannen).

### Toelichting op de cijfers

Bovenstaande cijfers zijn afkomstig uit de Nederlandse Kankerregistratie (NKR). Deze database bevat betrouwbare en objectieve gegevens over het voorkomen en de overleving van alle diagnoses kanker in Nederland. Het Integraal Kankercentrum Nederland (IKNL) beheert deze database.

Het is belangrijk dat u nadenkt over wat u wil weten. Deze cijfers kunnen 'goed' nieuws bevatten maar ook 'slecht' nieuws. Wat iemand wil weten, verschilt per persoon.

Vorige

Translation:

Many patients with cancer who have survived for a couple of years want to know the chance that they will survive another x years (given that they are still alive). We call this conditional survival. In general, for cancer patients who have already survived a number of years, survival expectations at diagnosis are typically more favorable.



# Prostaatcancer

## Wat is...

### Wat is...?

Onderzoek Prostaatcancer >

Behandeling Symptomen bij prostaatcancer >

Nieuwe Risicofactoren van prostaatcancer >

Niet met Bevolkingsonderzoek prostaatcancer >

Erfelijkheid en prostaatcancer >

Patiëntenorganisatie voor prostaatcancer >

Overlevingscijfers prostaatcancer >

Overige cijfers

1

2

3

## Resultaten

### Conditionele overlevingscijfer prostaatcancer

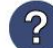

Van de patiënten met bovengenoemde kenmerken die 3 jaar na diagnose nog leefden, was de kans dat zij 5 jaar na diagnose nog in leven waren **gestegen van 94 procent naar 97 procent** (97 van de 100 mannen).

### Toelichting op de cijfers

Bovenstaande cijfers zijn afkomstig uit de Nederlandse Kankerregistratie (NKR). Deze database bevat betrouwbare en objectieve gegevens over het voorkomen en de overleving van alle diagnoses kanker in Nederland. Het Integraal Kankercentrum Nederland (IKCN) beheert deze database.

Bovenstaande cijfers zijn tot en met 2017. Meer recente cijfers zijn op dit moment niet beschikbaar. De veranderingen per jaar zijn meestal gering. Bovenstaande cijfers kunnen een indruk geven voor latere jaren.

Het is belangrijk dat u nadenkt over wat u wil weten. Deze cijfers kunnen 'goed' nieuws bevatten maar ook 'slecht' nieuws. Wat iemand wil weten, verschilt per persoon.

Vorige



# Example 2: prostate cancer

- Survival statistic: Less favorable
- Version: Long and detailed tool version

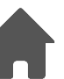

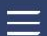

# Prostaatkanker

## Wat is...

### Wat is...?

Onderzoek Prostaatkanker >

Behandeling Symptomen bij prostaatkanker >

Nieuwe Risicofactoren van prostaatkanker >

Gevolgen Bevolkingsonderzoek prostaatkanker >

Erfelijkheid en prostaatkanker >

Patiëntenorganisatie voor prostaatkanker >

**Overlevingscijfers prostaatkanker >**

Overige cijfers

## Overlevingscijfers prostaatkanker

De volgende pagina's geven cijfers over prostaatkanker. U kunt zien hoeveel mensen jaarlijks prostaatkanker krijgen en hoeveel mensen deze ziekte overleven. Deze statistieken geven een algemeen beeld voor de hele groep. Deze geven geen informatie over uw situatie. Uw vooruitzichten kunnen beter of slechter zijn dan de vooruitzichten voor de hele groep. Bespreek uw vooruitzichten met uw arts.

Wij vinden het belangrijk dat patiënten en naasten toegang hebben tot betrouwbare cijfers, maar alleen als iemand ook daadwerkelijk meer wil weten over cijfers. De statistische berekeningen worden gedaan met de gegevens uit de Nederlandse Kankerregistratie (NKR).

Als u vragen heeft, is het belangrijk om de betreffende pagina te printen en mee te nemen naar het ziekenhuis, zodat u de informatie kunt bespreken met uw arts.

Volgende

Translation:

### Survival statistics prostate cancer

The next pages will show you statistics about prostate cancer. You will see how many men are diagnosed with prostate cancer, and how many of these men will survive prostate cancer. The statistics will give you a general idea for the entire group of patients. They do not say anything about your own situation. Your prognosis could be better or worse than the prognostic information that we show here. Please discuss your prognosis with your doctor.

We believe it is very important that patients and relatives have access to reliable statistics, but only if someone wants to know more about the statistics. The statistics are based on data from the Netherlands Cancer Registry (NCR). If you have any questions, you could always print the respective pages and take them with you to the next visit with your doctor, so you can discuss the results with him/her.

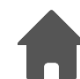

# Prostaatkanker

## Wat is...

### Wat is...?

Onderzoek Prostaatkanker >

Behandeling Symptomen bij prostaatkanker >

Nieuwe Risicofactoren van prostaatkanker >

Gevolgen Bevolkingsonderzoek prostaatkanker >

Erfelijkheid en prostaatkanker >

Patiëntenorganisatie voor prostaatkanker >

**Overlevingscijfers prostaatkanker** >

Overige cijfers

1

2

3

### Belangrijk om te weten voordat u verder gaat:

- Het is belangrijk dat u nadenkt over wat u wilt weten. Deze cijfers kunnen 'goed' nieuws bevatten maar ook 'slecht' nieuws. Wat iemand wil weten, verschilt per persoon.
- Alle getallen die wij geven, zijn gebaseerd op het verloop in het verleden. Onder invloed van betere diagnostiek en behandelingen, kunnen overlevingskansen voor huidige en toekomstige patiënten beter zijn dan de cijfers die wij hier tonen.
- Het lijkt soms alsof wij het heel 'precies' weten. Er is echter altijd sprake van onzekerheid. Hoe kleiner de aantallen, hoe groter de onzekerheid over het getal.

Vorige

Volgende

Translation:

### Important to know before you continue:

- It is important that you think about what you want to know. These statistics may contain 'good' or 'bad' news. What someone wants to know, differs per person.
- All statistics that we provide are based on what happened in the past. Given the improvements in terms of diagnosis and treatments, the survival statistics for recently diagnosed and future patients may be better than those statistics that we show here.
- It may seem that we know everything without any uncertainty. However, there is always uncertainty around statistics.



# Prostaatkanker

- Wat is...
- Onderzoek
- Behandeling
- Nieuwe
- Gevolgen
- Niet meer
- Wat is...?
- Prostaatkanker
- Symptomen bij prostaatkanker
- Risicofactoren van prostaatkanker
- Bevolkingsonderzoek prostaatkanker
- Erfelijkheid en prostaatkanker
- Patiëntenorganisatie voor prostaatkanker
- Overlevingscijfers prostaatkanker

1

2

3

U kunt ervoor kiezen algemene cijfers te zien, of gepersonaliseerde cijfers.

Wanneer u kiest voor **algemene cijfers**, krijgt u de cijfers van de gehele groep, zonder dat er rekening gehouden wordt met leeftijd, geslacht en ziektekenmerken. Deze kenmerken zijn wel van invloed op de kans op overleving.

Wanneer u kiest voor **gepersonaliseerde cijfers**, vragen wij u om een paar gegevens in te vullen. Daarna geven wij algemene cijfers aangevuld met de cijfers van de patiënten met dezelfde door u ingevulde kenmerken. Deze cijfers wijken af van de totale groep en kunnen uw situatie meer benaderen.

Het is belangrijk om u te realiseren dat het altijd gaat om resultaten voor een groep en dus nooit precies past op uw situatie. Gemiddeld kan de overleving 5 jaar zijn, maar dat betekent dat er een aantal mensen zijn die korter leven en een aantal die langer leven. In welke groep u gaat vallen, is niet te voorspellen.

Wilt u liever algemene cijfers zien, of gepersonaliseerde cijfers?

Algemene cijfers Gepersonaliseerde cijfers

Translation:

You may choose to see generic statistics, of personalized statistics. If you click on **generic statistics**, you will see statistics for all prostate cancer patients, without taking into account factors such as age, gender, or disease-related factors. These factors do have an influence on survival. If you click on **personalized statistics**, you will be asked to enter some data, after which you will be presented with statistics that are based on patients like you (with the same personal and disease-related characteristics).

These personalized statistics deviate from the generic, group-based statistics, and may therefore better relate to your own situation. It is important to realize that we will always present statistics that are applicable to a group (and they will never really apply to your situation). For example, the average survival rate could be 5 years, but that means that some patients will have a shorter life, whereas other will life a bit longer. We cannot predict in which category or group you will belong to. Would you like to see generic statistics, or personalized statistics?

# Prostaatkanker

Wat is...

Onderzoek

Behandeling

Nieuwe

Gevolgen

Niet meer

Overlevingscijfers

Overige cijfers

Wat is...?

Prostaatkanker

Symptomen bij prostaatkanker

Risicofactoren van prostaatkanker

Bevolkingsonderzoek prostaatkanker

Erfelijkheid en prostaatkanker

Patiëntenorganisatie voor prostaatkanker

Overlevingscijfers prostaatkanker

Overige cijfers

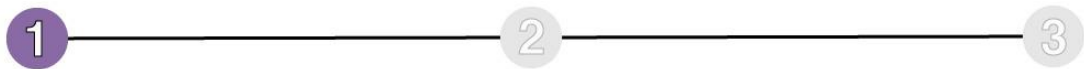

## Persoonlijke gegevens

Als we praten over het aantal nieuwe patiënten met prostaatkanker, tonen wij altijd de aantallen voor de hele groep. Maar we kunnen ook rekening houden met een aantal persoonlijke kenmerken.

- Wanneer u een geboortjaar invult, ziet u de aantallen van deze leeftijd.

### Wat is uw geslacht?

Man

### In welk jaar bent u geboren?

Vorige Volgende

Translation:

### Personal data

If we talk about the number of recently diagnosed patients with prostate cancer, we always show group-based statistics. However, we can also take a number of personal characteristics into account. In case you enter you year of birth, you will see the number of patients of that particular age.

- What is your gender? (men)
- What is your year of birth?

# Prostaatkanker

Wat is...

Onderzoek

Behandeling

Nieuwe

Gevolgen

Niet meer

Wat is...?

Prostaatkanker

Symptomen bij prostaatkanker

Risicofactoren van prostaatkanker

Bevolkingsonderzoek prostaatkanker

Erfelijkheid en prostaatkanker

Patiëntenorganisatie voor prostaatkanker

Overlevingscijfers prostaatkanker

Overige cijfers



## Persoonlijke gegevens

Als we praten over het aantal nieuwe patiënten met prostaatkanker, tonen wij altijd de aantallen voor de hele groep. Maar we kunnen ook rekening houden met een aantal persoonlijke kenmerken.

- Wanneer u een geboortjaar invult, ziet u de aantallen van deze leeftijd.

### Wat is uw geslacht?

Man

### In welk jaar bent u geboren?

1970

1969

1968

1967

1966

Vorige

Volgende

Translation:

### Personal data

If we talk about the number of recently diagnosed patients with prostate cancer, we always show group-based statistics. However, we can also take a number of personal characteristics into account. In case you enter you year of birth, you will see the number of patients of that particular age.

- What is your gender? (men)
- What is your year of birth?



# Prostaatkanker

Wat is...

Onderzoek

Behandeling

Nieuwe

Gevolgen

Niet meer

Overlevingscijfers

Overige cijfers

Wat is...?

Prostaatkanker

Symptomen bij prostaatkanker

Risicofactoren van prostaatkanker

Bevolkingsonderzoek prostaatkanker

Erfelijkheid en prostaatkanker

Patiëntenorganisatie voor prostaatkanker

Overlevingscijfers prostaatkanker

Overige cijfers

1

2

3

Persoonlijke gegevens

Als we praten over het aantal nieuwe patiënten met prostaatkanker, tonen wij altijd de aantallen voor de hele groep. Maar we kunnen ook rekening houden met een aantal persoonlijke kenmerken.

• Wanneer u een geboortjaar invult, ziet u de aantallen van deze leeftijd.

Wat is uw geslacht?

Man

In welk jaar bent u geboren?

1969

Vorige

Volgende

Translation:

Personal data

If we talk about the number of recently diagnosed patients with prostate cancer, we always show group-based statistics. However, we can also take a number of personal characteristics into account. In case you enter you year of birth, you will see the number of patients of that particular age.

- What is your gender? (men)
- What is your year of birth?

# Prostaatkanker

Wat is...

Wat is...?

Onderzoek

Behandeling

Nieuwe

Gevolgen

Niet meer

Overlevingscijfers

Prostaatkanker

Symptomen bij prostaatkanker

Risicofactoren van prostaatkanker

Bevolkingsonderzoek prostaatkanker

Erfelijkheid en prostaatkanker

Patiëntenorganisatie voor prostaatkanker

Prostaatkanker

1

2

3

## Gegevens over uw ziekte bij diagnose

We kunnen de cijfers nog meer op maat presenteren, wanneer u ook één of meerdere ziektekenmerken kunt invullen. Dit zijn gegevens over uw ziekte **bij diagnose**, zoals het stadium van de ziekte, en in welk jaar u de diagnose kreeg. Als u deze gegevens invult, kunnen wij overlevingscijfers tonen op basis van patiënten met ongeveer dezelfde ziektekenmerken bij diagnose. Ook nu is het belangrijk om na te denken of u wel cijfers wilt ontvangen op basis van deze gegevens. Als u bij alle kenmerken ‘weet ik niet’ invult, krijgt u de algemene cijfers te zien.

In welk jaar kreeg u de diagnose?

Wat was uw PSA-waarde bij diagnose?

Wat was uw Gleason-score bij diagnose?

Diagnosejaar

Onze statistische berekeningen gaan uit van het jaar van de **eerste diagnose**. Het is belangrijk om die in te vullen. In de Nederlandse Kankerregistratie zijn beperkt gegevens vastgelegd over patiënten na hun diagnose. We weten wel wanneer iemand overlijdt en waaraan diegenen zijn overleden.

Uitleg PSA-waarde

PSA is de afkorting van prostaat specifiek antigeen. Het is een eiwit dat vooral in de prostaat wordt gemaakt. Normaal komt PSA in kleine hoeveelheden voor in uw bloed.

Gleason-score

Hoe agressief de kankercellen zijn, wordt grade-

Vorige

Toon de cijfers

Translation:  
**Disease-related data**

- We can further personalize the statistics, for instance if you enter some disease-related characteristics at your diagnosis, such as the tumor stage, or the year of diagnosis. If you enter these data, we can show statistics based on patients like you with similar characteristics at their diagnosis. Again, please think about whether you really want to see personalized statistics. If you enter “I don’t know” for each characteristic, you will only see the generic statistics.
- Year of diagnosis? (Our calculations are based on the first cancer diagnosis. It is important to fill out this one, because the Netherlands Cancer Registry contains limited data of patients after their diagnosis. However, the NCR does know when a patient died (and its cause)).
  - PSA-value at diagnosis? (PSA stands for Prostate-specific antigen. This is a protein produced by normal, as well as malignant, cells of the prostate gland).

# Prostaatkanker

Wat is...

Wat is...?

Onderzoek

Behandeling

Nieuwe

Gevolgen

Niet meer

Overlevingscijfers

Prostaatkanker

Symptomen bij  
prostaatkanker

Risicofactoren van  
prostaatkanker

Bevolkingsonderzoek  
prostaatkanker

Erfelijkheid en  
prostaatkanker

Patiëntenorganisatie  
voor prostaatkanker

Overlevingscijfers

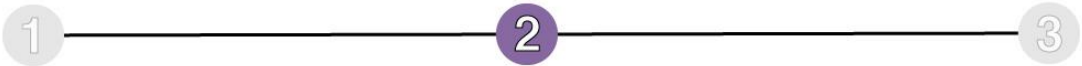

## Gegevens over uw ziekte bij diagnose

We kunnen de cijfers nog meer op maat presenteren, wanneer u ook één of meerdere ziektekenmerken kunt invullen. Dit zijn gegevens over uw ziekte **bij diagnose**, zoals het stadium van de ziekte, en in welk jaar u de diagnose kreeg. Als u deze gegevens invult, kunnen wij overlevingscijfers tonen op basis van patiënten met ongeveer dezelfde ziektekenmerken bij diagnose. Ook nu is het belangrijk om na te denken of u wel cijfers wilt ontvangen op basis van deze gegevens. Als u bij alle kenmerken ‘weet ik niet’ invult, krijgt u de algemene cijfers te zien.

### In welk jaar kreeg u de diagnose?

⌵

Weet ik niet

2019

2018

2017

2016

2015

**Diagnosejaar**  
Onze statistische berekeningen gaan uit van het jaar van de **eerste diagnose**. Het is belangrijk om die in te vullen. In de Nederlandse Kankerregistratie zijn beperkt gegevens vastgelegd over patiënten na hun diagnose. We weten wel wanneer iemand overlijdt en waaraan diegenen zijn overleden.

**Uitleg PSA-waarde**  
PSA is de afkorting van prostaat specifiek antigeen. Het is een eiwit dat vooral in de prostaat wordt gemaakt. Normaal komt PSA in kleine hoeveelheden voor in uw bloed.

**Gleason-score**  
Hoe agressief de kankercellen zijn, wordt grade-

Vorige

Toon de cijfers

Translation:

### Disease-related data

We can further personalize the statistics, for instance if you enter some disease-related characteristics at your diagnosis, such as the tumor stage, or the year of diagnosis. If you enter these data, we can show statistics based on patients like you with similar characteristics at their diagnosis. Again, please think about whether you really want to see personalized statistics. If you enter “I don’t know” for each characteristic, you will only see the generic statistics.

- Year of diagnosis? (Our calculations are based on the first cancer diagnosis. It is important to fill out this one, because the Netherlands Cancer Registry contains limited data of patients after their diagnosis. However, the NCR does know when a patient died (and its cause)).
- PSA-value at diagnosis? (PSA stands for Prostate-specific antigen. This is a protein produced by normal, as well as malignant, cells of the prostate gland).

# Prostaatkanker

Wat is...

Onderzoek

Behandeling

Nieuwe

Gevolgen

Niet meer

Overlevingscijfers

Wat is...?

Prostaatkanker

Symptomen bij prostaatkanker

Risicofactoren van prostaatkanker

Bevolkingsonderzoek prostaatkanker

Erfelijkheid en prostaatkanker

Patiëntenorganisatie voor prostaatkanker

Overlevingscijfers prostaatkanker

1

2

3

Gegevens over uw ziekte bij diagnose

We kunnen de cijfers nog meer op maat presenteren, wanneer u ook één of meerdere ziektekenmerken kunt invullen. Dit zijn gegevens over uw ziekte **bij diagnose**, zoals het stadium van de ziekte, en in welk jaar u de diagnose kreeg. Als u deze gegevens invult, kunnen wij overlevingscijfers tonen op basis van patiënten met ongeveer dezelfde ziektekenmerken bij diagnose. Ook nu is het belangrijk om na te denken of u wel cijfers wilt ontvangen op basis van deze gegevens. Als u bij alle kenmerken ‘weet ik niet’ invult, krijgt u de algemene cijfers te zien.

In welk jaar kreeg u de diagnose?

2015

Wat was uw PSA-waarde bij diagnose?

Wat was uw Gleason-score bij diagnose?

Diagnosejaar

Onze statistische berekeningen gaan uit van het jaar van de **eerste diagnose**. Het is belangrijk om die in te vullen. In de Nederlandse Kankerregistratie zijn beperkt gegevens vastgelegd over patiënten na hun diagnose. We weten wel wanneer iemand overlijdt en waaraan diegenen zijn overleden.

Uitleg PSA-waarde

PSA is de afkorting van prostaat specifiek antigeen. Het is een eiwit dat vooral in de prostaat wordt gemaakt. Normaal komt PSA in kleine hoeveelheden voor in uw bloed.

Gleason-score

Hoe agressief de kankercellen zijn, wordt grade-

Vorige

Toon de cijfers

Translation:

**Disease-related data**

We can further personalize the statistics, for instance if you enter some disease-related characteristics at your diagnosis, such as the tumor stage, or the year of diagnosis. If you enter these data, we can show statistics based on patients like you with similar characteristics at their diagnosis. Again, please think about whether you really want to see personalized statistics. If you enter “I don’t know” for each characteristic, you will only see the generic statistics.

- Year of diagnosis? (2015)
- PSA-value at diagnosis?

# Prostaatkanker

Wat is...

Onderzoek

Behandeling

Nieuwe

Gevolgen

Niet meer

Wat is...?

Prostaatkanker

Symptomen bij prostaatkanker

Risicofactoren van prostaatkanker

Bevolkingsonderzoek prostaatkanker

Erfelijkheid en prostaatkanker

Patiëntenorganisatie voor prostaatkanker

Overlevingscijfers prostaatkanker

1

2

3

## Gegevens over uw ziekte bij diagnose

We kunnen de cijfers nog meer op maat presenteren, wanneer u ook één of meerdere ziektekenmerken kunt invullen. Dit zijn gegevens over uw ziekte **bij diagnose**, zoals het stadium van de ziekte, en in welk jaar u de diagnose kreeg. Als u deze gegevens invult, kunnen wij overlevingscijfers tonen op basis van patiënten met ongeveer dezelfde ziektekenmerken bij diagnose. Ook nu is het belangrijk om na te denken of u wel cijfers wilt ontvangen op basis van deze gegevens. Als u bij alle kenmerken ‘weet ik niet’ invult, krijgt u de algemene cijfers te zien.

In welk jaar kreeg u de diagnose?

2015

Wat was uw PSA-waarde bij diagnose?

Lager dan 10

Tussen de 10 en 20

Hoger dan 20

Weet ik niet

Diagnosejaar

Onze statistische berekeningen gaan uit van het jaar van de **eerste diagnose**. Het is belangrijk om die in te vullen. In de Nederlandse Kankerregistratie zijn beperkt gegevens vastgelegd over patiënten na hun diagnose. We weten wel wanneer iemand overlijdt en waaraan diegenen zijn overleden.

Uitleg PSA-waarde

PSA is de afkorting van prostaat specifiek antigeen. Het is een eiwit dat vooral in de prostaat wordt gemaakt. Normaal komt PSA in kleine hoeveelheden voor in uw bloed.

Gleason-score

Hoe agressief de kankercellen zijn, wordt grade-

Vorige

Toon de cijfers

Translation:

**Disease-related data**

We can further personalize the statistics, for instance if you enter some disease-related characteristics at your diagnosis, such as the tumor stage, or the year of diagnosis. If you enter these data, we can show statistics based on patients like you with similar characteristics at their diagnosis. Again, please think about whether you really want to see personalized statistics. If you enter “I don’t know” for each characteristic, you will only see the generic statistics.

- Year of diagnosis? (2015)
- PSA-value at diagnosis? (Lower than 10, Between 10 and 20, Higher than 20, I don’t know)

# Prostaatkanker

Wat is...

Onderzoek

Behandeling

Nieuwe

Gevolgen

Niet meer

Overlevingscijfers

Wat is...?

Prostaatkanker

Symptomen bij prostaatkanker

Risicofactoren van prostaatkanker

Bevolkingsonderzoek prostaatkanker

Erfelijkheid en prostaatkanker

Patiëntenorganisatie voor prostaatkanker

Overlevingscijfers prostaatkanker

1

2

3

Gegevens over uw ziekte bij diagnose

We kunnen de cijfers nog meer op maat presenteren, wanneer u ook één of meerdere ziektekenmerken kunt invullen. Dit zijn gegevens over uw ziekte **bij diagnose**, zoals het stadium van de ziekte, en in welk jaar u de diagnose kreeg. Als u deze gegevens invult, kunnen wij overlevingscijfers tonen op basis van patiënten met ongeveer dezelfde ziektekenmerken bij diagnose. Ook nu is het belangrijk om na te denken of u wel cijfers wilt ontvangen op basis van deze gegevens. Als u bij alle kenmerken ‘weet ik niet’ invult, krijgt u de algemene cijfers te zien.

In welk jaar kreeg u de diagnose?

2015

Wat was uw PSA-waarde bij diagnose?

Hoger dan 20

Wat was uw Gleason-score bij diagnose?

Diagnosejaar

Onze statistische berekeningen gaan uit van het jaar van de **eerste diagnose**. Het is belangrijk om die in te vullen. In de Nederlandse Kankerregistratie zijn beperkt gegevens vastgelegd over patiënten na hun diagnose. We weten wel wanneer iemand overlijdt en waaraan diegenen zijn overleden.

Uitleg PSA-waarde

PSA is de afkorting van prostaat specifiek antigeen. Het is een eiwit dat vooral in de prostaat wordt gemaakt. Normaal komt PSA in kleine hoeveelheden voor in uw bloed.

Gleason-score

Hoe agressief de kankercellen zijn, wordt aange-

Vorige

Toon de cijfers

Translation:

**Disease-related data**

We can further personalize the statistics, for instance if you enter some disease-related characteristics at your diagnosis, such as the tumor stage, or the year of diagnosis. If you enter these data, we can show statistics based on patients like you with similar characteristics at their diagnosis. Again, please think about whether you really want to see personalized statistics. If you enter “I don’t know” for each characteristic, you will only see the generic statistics.

- Year of diagnosis? (2015)
- PSA-value at diagnosis? (Higher than 20)

# Prostaatkanker

Wat is...

Wat is...?

Onderzoek

Behandeling

Nieuwe

Gevolgen

Niet meer

Overlevingscijfers

Prostaatkanker

Symptomen bij prostaatkanker

Risicofactoren van prostaatkanker

Bevolkingsonderzoek prostaatkanker

Erfelijkheid en prostaatkanker

Patiëntenorganisatie voor prostaatkanker

prostaatkanker

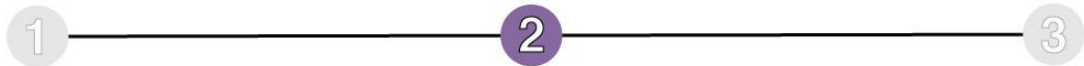

## Gegevens over uw ziekte bij diagnose

Wat was uw Gleason score bij diagnose?

▼

Wat was het stadium van de ziekte bij diagnose?

▼

**Gleason-score**  
Hoe agressief de kankercellen zijn, wordt grade-ring genoemd. Bij prostaatkanker wordt dit met de Gleason-score uitgedrukt. Deze score is een getal tussen 6 en 10. Hoe minder de kankercellen lijken op normaal prostaatweefsel, hoe hoger dit getal. En hoe kwaadaardiger de tumor.

**Stadium**  
Het stadium geeft aan hoever de ziekte zich in het lichaam heeft uitgebreid. De arts stelt het stadium vast. Bij prostaatkanker zijn er vier stadia

**Stadium 1:** De tumor bevindt zich alleen in de prostaat. De kanker kan niet worden gevoeld tijdens een digitaal rectaal onderzoek en is niet zichtbaar op röntgenopnamen.

**Stadium 2:** De tumor is verder ontwikkeld dan in stadium 1, maar (nog) niet buiten de prostaat uitgezaaid.

**Stadium 3:** De tumor is voorbij de buitenste laag van de prostaat naar nabijgelegen weefsel uitgezaaid. De kanker kan ook zijn uitgezaaid naar de zaadblaasjes.

**Stadium 4:** Prostaatkanker met aangetoonde uitzaaiingen in andere delen van het lichaam.

Translation:

**Disease-related data**

- Gleason-score at diagnosis? (The tumor grade says something about the aggressiveness of the tumor. For prostate cancer, this is expressed by means of the Gleason-score. This score is a number between 6 and 10. Cancer cells that deviate from healthy cells receive a high score. The higher this score, the more aggressive the tumor is).
- Tumor stage at diagnosis? The tumor stage says something about how far the cancer has progressed. The doctor will determine the tumor stage. For prostate cancer, there are four stages. **Stage 1:** the tumor is still within the prostate. The doctor cannot feel the tumor during a rectal exam, or the tumor is not visible on a scan. **Stage 2:** the tumor remains confined to the prostate gland, but it has not spread outside the prostate. **Stage 3:** the tumor is locally advanced. The tumor has progressed and is more likely to grow and spread. **Stage 4:** the tumor has spread to lymph nodes or to other parts of the body.

48

# Prostaatkanker

Wat is...

Wat is...?

Onderzoek

Prostaatkanker

>

Behandeling

Symptomen bij prostaatkanker

>

Nieuwe

Risicofactoren van prostaatkanker

>

Gevolgen

Bevolkingsonderzoek prostaatkanker

>

Niet meer

Erfelijkheid en prostaatkanker

>

Patiëntenorganisatie voor prostaatkanker

>

Overlevingscijfers prostaatkanker

>

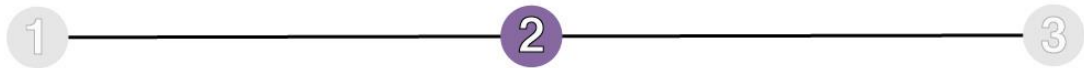

## Gegevens over uw ziekte bij diagnose

Wat was uw Gleason score bij diagnose?

▼

Lager dan 7

7

Hoger dan 7

Weet ik niet

ose?

**Gleason-score**  
Hoe agressief de kankercellen zijn, wordt grade-ring genoemd. Bij prostaatkanker wordt dit met de Gleason-score uitgedrukt. Deze score is een getal tussen 6 en 10. Hoe minder de kankercellen lijken op normaal prostaatweefsel, hoe hoger dit getal. En hoe kwaadaardiger de tumor.

**Stadium**  
Het stadium geeft aan hoever de ziekte zich in het lichaam heeft uitgebreid. De arts stelt het stadium vast. Bij prostaatkanker zijn er vier stadia.

**Stadium 1:** De tumor bevindt zich alleen in de prostaat. De kanker kan niet worden gevoeld tijdens een digitaal rectaal onderzoek en is niet zichtbaar op röntgenopnamen.

**Stadium 2:** De tumor is verder ontwikkeld dan in stadium I, maar (nog) niet buiten de prostaat uitgezaaid.

**Stadium 3:** De tumor is voorbij de buitenste laag van de prostaat naar nabijgelegen weefsel uitgezaaid. De kanker kan ook zijn uitgezaaid naar de zaadblaasjes.

**Stadium 4:** Prostaatkanker met aangetoonde uitzaaiingen in andere delen van het lichaam.

Translation:

**Disease-related data**

- Gleason-score at diagnosis? (Lower than 7, 7, Higher than 7, I don't know)
- Tumor stage at diagnosis?

# Prostaatkanker

## Wat is...

Onderzoek Prostaatkanker >

Behandeling Symptomen bij prostaatkanker >

Nieuwe Risicofactoren van prostaatkanker >

Gevolgen Bevolkingsonderzoek prostaatkanker >

Erfelijkheid en prostaatkanker >

Patiëntenorganisatie voor prostaatkanker >

Overlevingscijfers prostaatkanker >

## Wat is...?

1

2

3

## Gegevens over uw ziekte bij diagnose

Wat was uw Gleason score bij diagnose?

Hoger dan 7

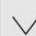

Wat was het stadium van de ziekte bij diagnose?

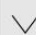

### Gleason-score

Hoe agressief de kankercellen zijn, wordt gradering genoemd. Bij prostaatkanker wordt dit met de Gleason-score uitgedrukt. Deze score is een getal tussen 6 en 10. Hoe minder de kankercellen lijken op normaal prostaatsmijf, hoe hoger dit getal. En hoe kwaadaardiger de tumor.

### Stadium

Het stadium geeft aan hoever de ziekte zich in het lichaam heeft uitgebreid. De arts stelt het stadium vast. Bij prostaatkanker zijn er vier stadia.

**Stadium 1:** De tumor bevindt zich alleen in de prostaat. De kanker kan niet worden gevoeld tijdens een digitaal rectaal onderzoek en is niet zichtbaar op röntgenopnamen.

**Stadium 2:** De tumor is verder ontwikkeld dan in stadium 1, maar (nog) niet buiten de prostaat uitgezaaid.

**Stadium 3:** De tumor is voorbij de buitenste laag van de prostaat naar nabijgelegen weefsel uitgezaaid. De kanker kan ook zijn uitgezaaid naar de zaadblaasjes.

**Stadium 4:** Prostaatkanker met aangetoonde uitzaaiingen in andere delen van het lichaam.

Vorige

Toon de cijfers

Translation:

### Disease-related data

- Gleason-score at diagnosis? (Higher than 7)
- Tumor stage at diagnosis?



# Prostaatkanker

- Wat is...
- Onderzoek
- Behandeling
- Nieuwe
- Gevolgen
- Niet meer
- Wat is...?
- Prostaatkanker
- Symptomen bij prostaatkanker
- Risicofactoren van prostaatkanker
- Bevolkingsonderzoek prostaatkanker
- Erfelijkheid en prostaatkanker
- Patiëntenorganisatie voor prostaatkanker
- Overlevingscijfers prostaatkanker

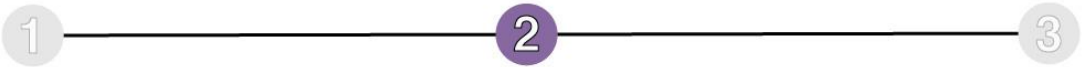

## Gegevens over uw ziekte bij diagnose

Wat was uw Gleason score bij diagnose?

Hoger dan 7

Wat was het stadium van de ziekte bij diagnose?

Stadium I

Stadium II

Stadium III

Stadium IV

Weet ik niet

**Gleason-score**  
Hoe agressief de kankercellen zijn, wordt grade-ring genoemd. Bij prostaatkanker wordt dit met de Gleason-score uitgedrukt. Deze score is een getal tussen 6 en 10. Hoe minder de kankercellen lijken op normaal prostaatweefsel, hoe hoger dit getal. En hoe kwaadaardiger de tumor.

**Stadium**  
Het stadium geeft aan hoever de ziekte zich in het lichaam heeft uitgebreid. De arts stelt het stadium vast. Bij prostaatkanker zijn er vier stadia.

**Stadium 1:** De tumor bevindt zich alleen in de prostaat. De kanker kan niet worden gevoeld tijdens een digitaal rectaal onderzoek en is niet zichtbaar op röntgenopnamen.

**Stadium 2:** De tumor is verder ontwikkeld dan in stadium I, maar (nog) niet buiten de prostaat uitgezaaid.

**Stadium 3:** De tumor is voorbij de buitenste laag van de prostaat naar nabijgelegen weefsel uitgezaaid. De kanker kan ook zijn uitgezaaid naar de zaadblaasjes.

**Stadium 4:** Prostaatkanker met aangetoonde uitzaaiingen in andere delen van het lichaam.

Vorige Toon de cijfers

Translation:

Disease-related data

- Gleason-score at diagnosis? (Higher than 7)
- Tumor stage at diagnosis? (Stage I, stage II, stage II, Stage IV)

# Prostaatkanker

Wat is...

Wat is...?

Onderzoek

Behandeling

Nieuwe

Gevolgen

Niet meer

Overlevingscijfers

Prostaatkanker

Symptomen bij prostaatkanker

Risicofactoren van prostaatkanker

Bevolkingsonderzoek prostaatkanker

Erfelijkheid en prostaatkanker

Patiëntenorganisatie voor prostaatkanker

prostaatkanker

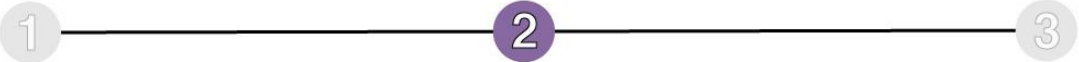

## Gegevens over uw ziekte bij diagnose

Wat was uw Gleason score bij diagnose?

Hoger dan 7

Wat was het stadium van de ziekte bij diagnose?

Stadium IV

**Gleason-score**  
Hoe agressief de kankercellen zijn, wordt grade-ring genoemd. Bij prostaatkanker wordt dit met de Gleason-score uitgedrukt. Deze score is een getal tussen 6 en 10. Hoe minder de kankercellen lijken op normaal prostaatweefsel, hoe hoger dit getal. En hoe kwaadaardiger de tumor.

**Stadium**  
Het stadium geeft aan hoever de ziekte zich in het lichaam heeft uitgebreid. De arts stelt het stadium vast. Bij prostaatkanker zijn er vier stadia.

**Stadium 1:** De tumor bevindt zich alleen in de prostaat. De kanker kan niet worden gevoeld tijdens een digitaal rectaal onderzoek en is niet zichtbaar op röntgenopnamen.

**Stadium 2:** De tumor is verder ontwikkeld dan in stadium 1, maar (nog) niet buiten de prostaat uitgezaaid.

**Stadium 3:** De tumor is voorbij de buitenste laag van de prostaat naar nabijgelegen weefsel uitgezaaid. De kanker kan ook zijn uitgezaaid naar de zaadblaasjes.

**Stadium 4:** Prostaatkanker met aangetoonde uitzaaiingen in andere delen van het lichaam.

- Translation:
- Disease-related data**
- Gleason-score at diagnosis? (Higher than 7)
  - Tumor stage at diagnosis? (stage IV)

# Prostaatkanker

## Wat is...

### Wat is...?

Onderzoek Prostaatkanker >

Behandeling Symptomen bij prostaatkanker >

Nieuwe diagnose Risicofactoren van prostaatkanker >

Gevolgen Bevolkingsonderzoek prostaatkanker >

Erfelijkheid en prostaatkanker >

Patiëntenorganisatie voor prostaatkanker >

Overlevingscijfers prostaatkanker >

Overige cijfers

1

2

3

## Resultaten

Op deze pagina ziet u cijfers over prostaatkanker. U heeft aangegeven om gepersonaliseerde cijfers te ontvangen, zodat deze uw situatie meer benaderen.

De cijfers die wij tonen, zullen daarom gebaseerd zijn op mannen die op **50-jarige leeftijd** de diagnose **prostaatkanker stadium 4** kregen (PSA-waarde hoger dan 20, en Gleason-score hoger dan 7).

Hoeveel mannen kregen de diagnose prostaatkanker in 2015?

Hoeveel mannen overleven prostaatkanker?

Het is belangrijk dat u nadenkt over wat u wil weten. Deze cijfers kunnen 'goed' nieuws bevatten maar ook 'slecht' nieuws. Wat iemand wil weten, verschilt per persoon.

Vorige

Translation:

### Results

On this page, you will see some prostate cancer statistics. You have indicated to receive personalized statistics that are closer to your personal situation. For this reason, the statistics will be based on men **aged 50**, diagnosed with **prostate cancer stage 4** (PSA-value higher than 20 and Gleason score higher than 7).

How many men were diagnosed with prostate cancer in 2015?

How many men survive prostate cancer?

It is important that you think about what you would like to know. These statistics can contain 'good' but also 'bad' news. What someone wants to know differs per person.

# Prostaatkanker

## Wat is...

### Wat is...?

Onderzoek Prostaatkanker >

Behandeling Symptomen bij prostaatkanker >

Nieuwe diagnose Risicofactoren van prostaatkanker >

Gevolgen Bevolkingsonderzoek prostaatkanker >

Erfelijkheid en prostaatkanker >

Patiëntenorganisatie voor prostaatkanker >

Overlevingscijfers prostaatkanker >

Overige cijfers

1

2

3

## Resultaten

Op deze pagina ziet u cijfers over prostaatkanker. U heeft aangegeven om gepersonaliseerde cijfers te ontvangen, zodat deze uw situatie meer benaderen.

De cijfers die wij tonen, zullen daarom gebaseerd zijn op mannen die op **50-jarige leeftijd** de diagnose **prostaatkanker stadium 4** kregen (PSA-waarde hoger dan 20, en Gleason-score hoger dan 7).

### Hoeveel mannen kregen de diagnose prostaatkanker in 2015?

In **2015** kregen in totaal 10.629 mannen de diagnose prostaatkanker. Als we rekening houden met de bovengenoemde kenmerken, kregen in 2015 70 mannen de diagnose prostaatkanker stadium 4 (PSA-waarde hoger dan 20, en Gleason-score hoger dan 7) op 50-jarige leeftijd.

### Hoeveel mannen overleven prostaatkanker?

Het is belangrijk dat u nadenkt over wat u wil weten. Deze cijfers kunnen 'goed' nieuws bevatten maar ook 'slecht' nieuws. Wat iemand wil weten, verschilt per persoon.

[Vorige](#)

Translation:

In **2015**, in total 10.629 men were diagnosed with prostate cancer. If we take the above mentioned characteristics into account, 70 men like you (aged 50, PSA-value higher than 20, and Gleason score higher than 7) were diagnosed with prostate cancer stage IV in 2015.



# Prostaatkanker

Wat is...

Wat is...?

Onderzoek

Behandeling

Nieuwe

Gevolgen

Niet meer

Overlevingscijfers

Prostaatkanker

Symptomen bij prostaatkanker

Risicofactoren van prostaatkanker

Bevolkingsonderzoek prostaatkanker

Erfelijkheid en prostaatkanker

Patiëntenorganisatie voor prostaatkanker

Prostaatkanker

1

2

3

## Resultaten

### Hoeveel mannen overleven prostaatkanker?

Met **overleving** bedoelen we hoeveel mensen met een bepaalde vorm van kanker na een bepaalde periode nog in leven zijn. In dit geval laten we zien hoeveel mannen met de diagnose prostaatkanker 5 jaar na diagnose nog in leven zijn.

Om betrouwbare getallen te geven, moet er gerekend worden met grote aantallen patiënten die in het verleden prostaatkanker hebben gehad. De cijfers die wij hier tonen zullen gebaseerd zijn op patiënten met de bovengenoemde kenmerken die tussen 2012 en 2017 de diagnose prostaatkanker kregen.

We laten eerst de kans op overleving zien van alle patiënten met prostaatkanker. 5 jaar na diagnose was ongeveer **89 procent** van de prostaatkanker patiënten nog in leven (89 van de 100 mannen).

We kunnen ook de kans op overleving laten zien van prostaatkanker patiënten die bij diagnose de bovengenoemde kenmerken hadden. 5 jaar na diagnose was ongeveer **47 procent** van deze patiënten nog in leven (47 van de 100 mannen).

Het is belangrijk dat u nadenkt over wat u wil weten. Deze cijfers kunnen 'goed' nieuws bevatten maar ook 'slecht' nieuws. Wat iemand wil weten, verschilt per persoon.

Vorige

Translation:

With **survival** we mean the percentage of people with cancer still alive after a particular amount of time. Here we will show you how many men are still alive 5 years after diagnosis.

In order to provide you with reliable statistics we need to perform statistics on a large group of patients that have been diagnosed with prostate cancer in the past. The statistics that we show here are performed on data from patients diagnosed between 2012 and 2017.

We will first show you the chance of survival for all men with prostate cancer. 5 years after diagnosis, about **89 percent** of these patients with prostate cancer are alive (89 out of 100 men). We can also show you the chance of survival for men with prostate cancer diagnosed with the above mentioned characteristics. 5 years after diagnosis, about **47 percent** of these patients with prostate cancer are alive (47 out of 100 men).

# Prostaatkanker

- Wat is...
- Onderzoek
- Behandeling
- Nieuwe
- Gevolgen
- Niet meer
- Wat is...?
- Prostaatkanker
- Symptomen bij prostaatkanker
- Risicofactoren van prostaatkanker
- Bevolkingsonderzoek prostaatkanker
- Erfelijkheid en prostaatkanker
- Patiëntenorganisatie voor prostaatkanker
- Overlevingscijfers

1

2

3

Resultaten

zijn op patiënten met de bovengenoemde kenmerken die tussen 2012 en 2017 de diagnose prostaatkanker kregen.

We laten eerst de kans op overleving zien van alle patiënten met prostaatkanker. 5 jaar na diagnose was ongeveer **89 procent** van de prostaatkanker patiënten nog in leven (89 van de 100 mannen).

We kunnen ook de kans op overleving laten zien van prostaatkanker patiënten die bij diagnose de bovengenoemde kenmerken hadden. 5 jaar na diagnose was ongeveer **47 procent** van deze patiënten nog in leven (47 van de 100 mannen).

Het is belangrijk om te weten dat uw vooruitzichten nog steeds beter of slechter kunnen zijn dan de vooruitzichten voor deze specifieke groep. Bespreek uw vooruitzichten met uw arts.

Figuur

Verbeterd de kans op overleving met elk overleefd jaar?

Het is belangrijk dat u nadenkt over wat u wil weten. Deze cijfers kunnen 'goed' nieuws bevatten maar ook 'slecht' nieuws. Wat iemand wil weten, verschilt per persoon.

Vorige

Translation:

In order to provide you with reliable statistics we need to perform statistics on a large group of patients that have been diagnosed with prostate cancer in the past. The statistics that we show here are performed on data from patients diagnosed between 2012 and 2017.

We will first show you the chance of survival for all men with prostate cancer. 5 years after diagnosis, about **89 percent** of these patients with prostate cancer are alive (89 out of 100 men). We can also show you the chance of survival for men with prostate cancer diagnosed with the above mentioned characteristics. 5 years after diagnosis, about **47 percent** of these patients with prostate cancer are alive (47 out of 100 men).

It is important to know that your prognosis can still be better or worse than the prognosis of this specific group of patients. Discuss your prognosis with your doctor.

Figure

What is the survival statistic after having survived a period of time?

# Prostaatkanker

- Wat is...**
- Onderzoek

Behandeling

Nieuwe

Gevolgen

Niet meer
- Wat is...?

Prostaatkanker

Symptomen bij prostaatkanker

Risicofactoren van prostaatkanker

Bevolkingsonderzoek prostaatkanker

Erfelijkheid en prostaatkanker

Patiëntenorganisatie voor prostaatkanker

**Overlevingscijfers**

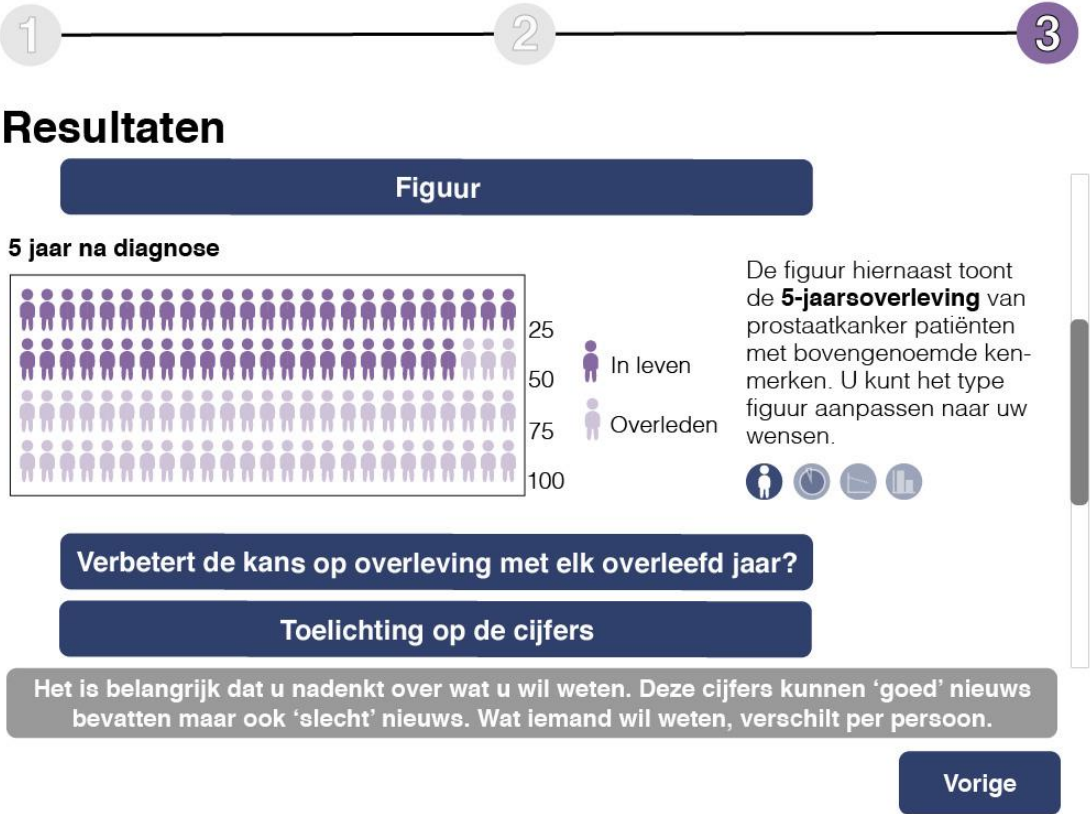

Translation:  
This figure shows the **5 year survival statistic** for prostate cancer with the above mentioned characteristics. You can change the type of figure.  
In leven = are alive  
Overleden = die

# Prostaatkanker

- Wat is...
- Onderzoek

Prostaatkanker

>
- Behandeling

Symptomen bij prostaatkanker

>
- Nieuw onderzoek

Risicofactoren van prostaatkanker

>
- Gevolgen

Bevolkingsonderzoek prostaatkanker

>
- Niet medisch

Erfelijkheid en prostaatkanker

>
- Patiëntenorganisatie voor prostaatkanker

>
- Overlevingscijfers prostaatkanker

>

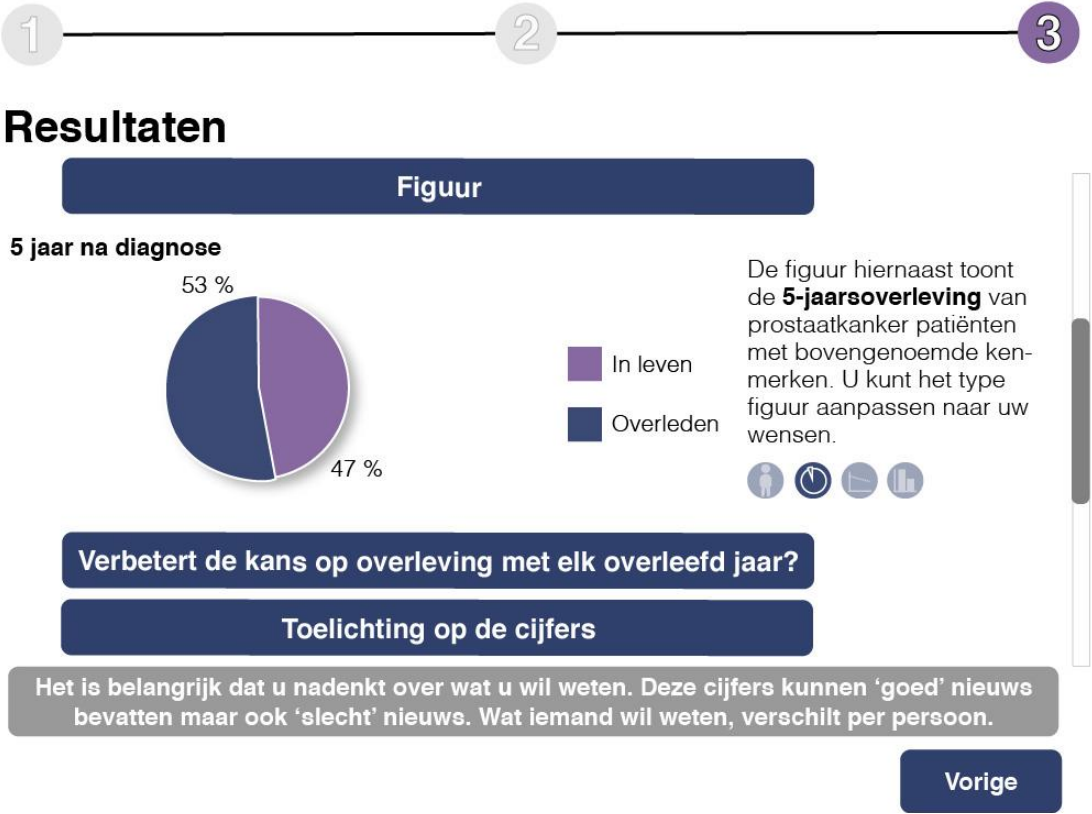

Translation:  
This figure shows the **5 year survival statistic** for prostate cancer with the above mentioned characteristics. You can change the type of figure.  
In leven = are alive  
Overleden = die

# Prostaatkanker

- Wat is...

Wat is...?
- Onderzoek

Prostaatkanker

>
- Behandeling

Symptomen bij prostaatkanker

>
- Nieuwe

Risicofactoren van prostaatkanker

>
- Gevolgen

Bevolkingsonderzoek prostaatkanker

>
- Niet meer

Erfelijkheid en prostaatkanker

>
- Patiëntenorganisatie voor prostaatkanker

>
- Overlevingscijfers

prostaatkanker

>

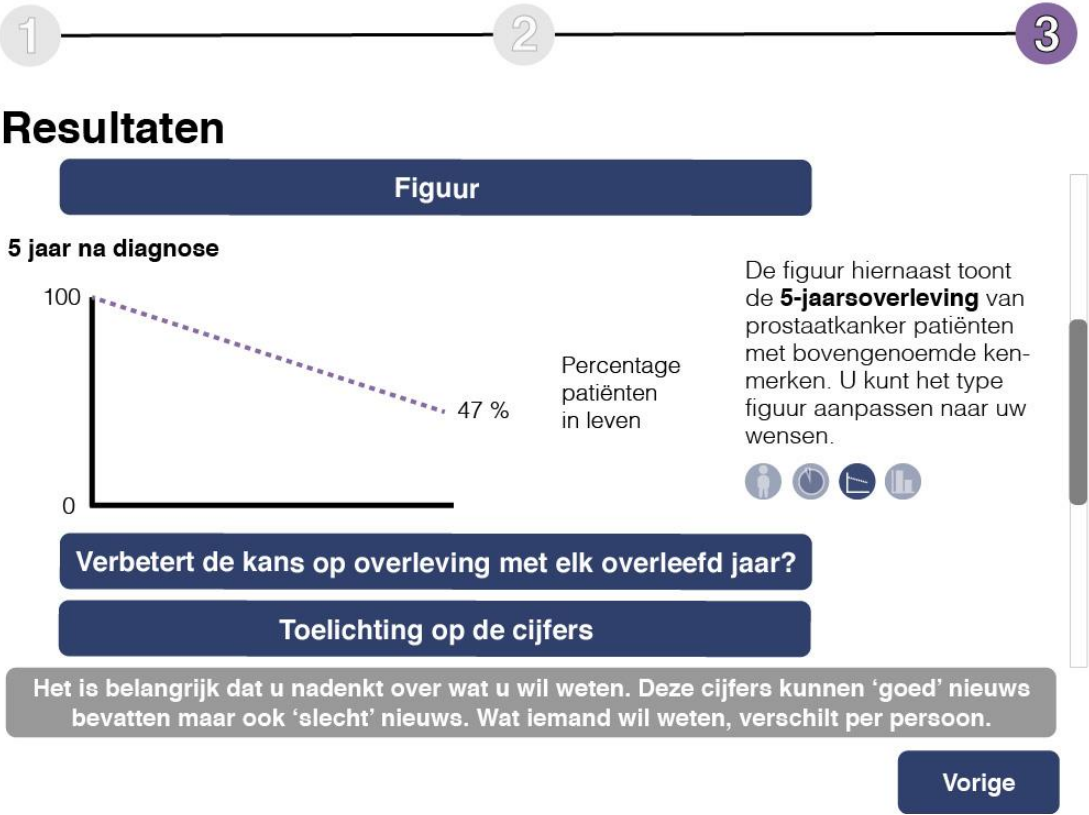

Translation:  
This figure shows the **5 year survival statistic** for prostate cancer with the above mentioned characteristics. You can change the type of figure.  
In leven = are alive  
Overleden = die

# Prostaatkanker

- Wat is...

Wat is...?
- Onderzoek

Prostaatkanker

>
- Behandeling

Symptomen bij prostaatkanker

>
- Nieuwe

Risicofactoren van prostaatkanker

>
- Gevolgen

Bevolkingsonderzoek prostaatkanker

>
- Niet meer

Erfelijkheid en prostaatkanker

>
- Patiëntenorganisatie voor prostaatkanker

>
- Overlevingscijfers

prostaatkanker

>

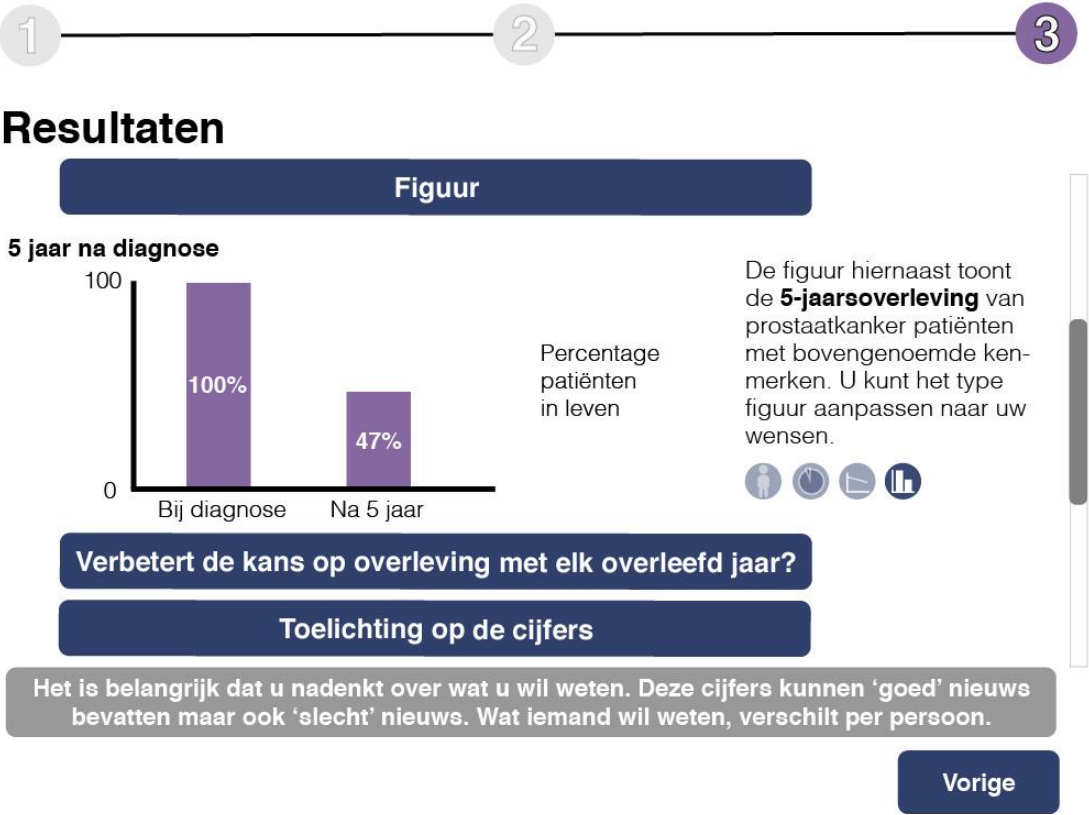

Translation:  
This figure shows the **5 year survival statistic** for prostate cancer with the above mentioned characteristics. You can change the type of figure.  
In leven = are alive  
Overleden = die

# Prostaatkanker

Wat is...

Onderzoek

Behandeling

Nieuwe

Gevolgen

Niet meer

Wat is...?

Prostaatkanker

Symptomen bij prostaatkanker

Risicofactoren van prostaatkanker

Bevolkingsonderzoek prostaatkanker

Erfelijkheid en prostaatkanker

Patiëntenorganisatie voor prostaatkanker

Overlevingscijfers prostaatkanker

Overige cijfers

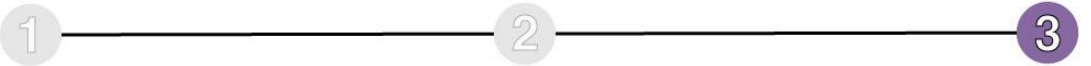

## Resultaten

### Verbetert de kans op overleving met elk overleefd jaar?

Veel kankerpatiënten die hun ziekte reeds enige tijd hebben overleefd, willen graag weten wat hun vooruitzichten zijn gelet op het feit dat ze nog (steeds) in leven zijn. Dit wordt 'conditionele overleving' genoemd. De overlevingscijfers worden vaak beter met ieder jaar dat de patiënt overleeft.

Van de patiënten met bovengenoemde kenmerken die 4 jaar na diagnose nog leefden, was de kans dat zij 5 jaar na diagnose nog in leven waren **gestegen van 47 procent naar 87 procent** (87 van de 100 mannen).

### Toelichting op de cijfers

Het is belangrijk dat u nadenkt over wat u wil weten. Deze cijfers kunnen 'goed' nieuws bevatten maar ook 'slecht' nieuws. Wat iemand wil weten, verschilt per persoon.

Vorige

Translation:

Many patients with cancer who have survived for a couple of years want to know the chance that they will survive another x years (given that they are still alive). We call this conditional survival. In general, for cancer patients who have already survived a number of years, survival expectations at diagnosis are typically more favorable. Of those patients like you who were still alive 4 years after diagnosis, the chance that they would still be alive 5 years after diagnosis increased from **47 percent to 87 percent** (87 out of 100 men).



# Prostaat­kanker

## Wat is...

Onderzoeken

Behandelingen

Nieuw onderzoek

Gevolgen

Niet meer

## Wat is...?

Prostaat­kankerSymptomen bij  
prostaat­kankerRisicofactoren van  
prostaat­kankerBevolkingsonderzoek  
prostaat­kankerErfelijkheid en  
prostaat­kankerPatiëntenorganisatie  
voor prostaat­kankerOverlevingscijfers  
prostaat­kanker

Overige cijfers

1

2

3

## Resultaten

man vooruitzichten zijn gericht op het feit dat ze nog (steeds) in leven zijn. Dit wordt 'conditionele overleving' genoemd. De overlevingscijfers worden vaak beter met ieder jaar dat de patiënt overleeft.

Van de patiënten met bovengenoemde kenmerken die 4 jaar na diagnose nog leefden, was de kans dat zij 5 jaar na diagnose nog in leven waren **gestegen van 47 procent naar 87 procent** (87 van de 100 mannen).

### Toelichting op de cijfers

Bovenstaande cijfers zijn afkomstig uit de Nederlandse Kankerregistratie (NKR). Deze database bevat betrouwbare en objectieve gegevens over het voorkomen en de overleving van alle diagnoses kanker in Nederland. Het Integraal Kankercentrum Nederland (IKCN) beheert deze database.

Bovenstaande cijfers zijn tot en met 2017. Meer recente cijfers zijn op dit moment niet beschikbaar. De veranderingen per jaar zijn meestal gering. Bovenstaande cijfers kunnen een indruk geven voor latere jaren.

Het is belangrijk dat u nadenkt over wat u wil weten. Deze cijfers kunnen 'goed' nieuws bevatten maar ook 'slecht' nieuws. Wat iemand wil weten, verschilt per persoon.

Vorige

Translation:

### About the statistics

The statistics that we show are based on data from the Netherlands Cancer Registry (NCR). This database contains reliable and objective data about the prevalence and survival of all cancer patients in the Netherlands. The Netherlands Comprehensive Cancer Organisation hosts this database.

The statistics that we showed are until 2017. More recent statistics are currently not available. However, annual changes are typically limited. The statistics provided here may therefore give an impression for future years.

# Example 3: breast cancer

- Survival statistic: Favorable
- Version: Long and detailed version



# Borstkanker

|                      |                                   |   |
|----------------------|-----------------------------------|---|
| Algemeen             | Algemeen                          |   |
| Soorten              | Borstkanker                       | > |
| Onderzoek            | Symptomen bij borstkanker         | > |
| De diagnose          | Risicofactoren van borstkanker    | > |
| Behandeling          | Erfelijke aanleg voor borstkanker | > |
| Nieuwe behandelingen | Hormonen en borstkanker           | > |
| Uitgezaaid           | Dicht borstklierweefsel           | > |
| Gevolgen             | Bevolkingsonderzoek borstkanker   | > |
| Niet meer behandelen |                                   |   |
| Over de borstkanker  |                                   |   |
|                      | Overlevingscijfers borstkanker    | > |

## Overlevingscijfers borstkanker

De volgende pagina's geven cijfers over borstkanker. U kunt zien hoeveel mensen jaarlijks borstkanker krijgen en hoeveel mensen deze ziekte overleven. Deze statistieken geven een algemeen beeld voor de hele groep. Deze geven geen informatie over uw situatie. Uw vooruitzichten kunnen beter of slechter zijn dan de vooruitzichten voor de hele groep. Bespreek uw vooruitzichten met uw arts.

Wij vinden het belangrijk dat patiënten en naasten toegang hebben tot betrouwbare cijfers, maar alleen als iemand ook daadwerkelijk meer wil weten over cijfers. De statistische berekeningen worden gedaan met de gegevens uit de Nederlandse Kankerregistratie (NKR).

Als u vragen heeft, is het belangrijk om de betreffende pagina te printen en mee te nemen naar het ziekenhuis, zodat u de informatie kunt bespreken met uw arts.

Volgende

Translation:

**Survival statistics breast cancer**

The next pages will show you statistics about breast cancer. You will see how many women are diagnosed with breast cancer, and how many of these women will survive breast cancer. The statistics will give you a general idea for the entire group of patients. They do not say anything about your own situation. Your prognosis could be better or worse than the prognostic information that we show here. Please discuss your prognosis with your doctor.

We believe it is very important that patients and relatives have access to reliable statistics, but only if someone wants to know more about the statistics. The statistics are based on data from the Netherlands Cancer Registry (NCR). If you have any questions, you could always print the respective pages and take them with you to the next visit with your doctor, so you can discuss the results with him/her.

64

# Borstkanker

Algemeen

Soorten borstkanker

Onderzoek symptomen bij borstkanker

De diagnose

Behandeling borstkanker

Nieuwe ontwikkelingen

Uitgezaaid borstkanker

Gevolgen borstkanker

Niet meer borstkanker

Over de borstkanker

Overlevingscijfers borstkanker

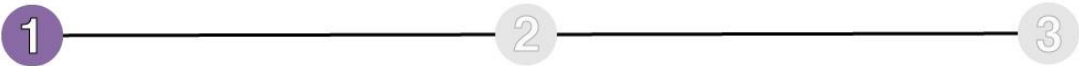

### Belangrijk om te weten voordat u verder gaat:

- Het is belangrijk dat u nadenkt over wat u wilt weten. Deze cijfers kunnen ‘goed’ nieuws bevatten maar ook ‘slecht’ nieuws. Wat iemand wil weten, verschilt per persoon.
- Alle getallen die wij geven, zijn gebaseerd op het verloop in het verleden. Onder invloed van betere diagnostiek en behandelingen, kunnen overlevingskansen voor huidige en toekomstige patiënten beter zijn dan de cijfers die wij hier tonen.
- Het lijkt soms alsof wij het heel ‘precies’ weten. Er is echter altijd sprake van onzekerheid. Hoe kleiner de aantallen, hoe groter de onzekerheid over het getal.

Translation:

**Important to know before you continue:**

- It is important that you think about what you want to know. These statistics may contain ‘good’ or ‘bad’ news. What someone wants to know, differs per person.
- All statistics that we provide are based on what happened in the past. Given the improvements in terms of diagnosis and treatments, the survival statistics for recently diagnosed and future patients may be better than those statistics that we show here.
- It may seem that we know everything without any uncertainty. However, there is always uncertainty around statistics.

# Borstkanker

|                      |                                   |
|----------------------|-----------------------------------|
| Algemeen             | Algemeen                          |
| Soorten              | Borstkanker                       |
| Onderzoek            | Symptomen bij borstkanker         |
| De diagnose          | Risicofactoren van borstkanker    |
| Behandeling          | Erfelijke aanleg voor borstkanker |
| Nieuwe behandelingen | Hormonen en borstkanker           |
| Uitgeval             | Dicht borstklierweefsel           |
| Gevolgen             | Bevolkingsonderzoek borstkanker   |
| Niet meer behandelen | Overlevingscijfers borstkanker    |

1

2

3

U kunt ervoor kiezen algemene cijfers te zien, of gepersonaliseerde cijfers.

Wanneer u kiest voor **algemene cijfers**, krijgt u de cijfers van de gehele groep, zonder dat er rekening gehouden wordt met leeftijd, geslacht en ziektekenmerken. Deze kenmerken zijn wel van invloed op de kans op overleving.

Wanneer u kiest voor **gepersonaliseerde cijfers**, vragen wij u om een paar gegevens in te vullen. Daarna geven wij algemene cijfers aangevuld met de cijfers van de patiënten met dezelfde door u ingevulde kenmerken. Deze cijfers wijken af van de totale groep en kunnen uw situatie meer benaderen.

Het is belangrijk om u te realiseren dat het altijd gaat om resultaten voor een groep en dus nooit precies past op uw situatie. Gemiddeld kan de overleving 5 jaar zijn, maar dat betekent dat er een aantal mensen zijn die korter leven en een aantal die langer leven. In welke groep u gaat vallen, is niet te voorspellen.

Wilt u liever algemene cijfers zien, of gepersonaliseerde cijfers?

Algemene cijfers

Gepersonaliseerde cijfers

Translation:

You may choose to see generic statistics, of personalized statistics. If you click on **generic statistics**, you will see statistics for all breast cancer patients, without taking into account factors such as age, gender, or disease-related factors. These factors do have an influence on survival. If you click on **personalized statistics**, you will be asked to enter some data, after which you will be presented with statistics that are based on patients like you (with the same personal and disease-related characteristics).

These personalized statistics deviate from the generic, group-based statistics, and may therefore better relate to your own situation. It is important to realize that we will always present statistics that are applicable to a group (and they will never really apply to your situation). For example, the average survival rate could be 5 years, but that means that some patients will have a shorter life, whereas other will live a bit longer. We cannot predict in which category or group you will belong to. Would you like to see generic statistics, or personalized statistics?

# Borstkanker

Algemeen

Soorten

Onderzoek

De diagnose

Behandeling

Nieuwe patiënten

Uitgezaaid

Gevolgen

Niet meer

Over de

Overlevingscijfers

Algemeen

Borstkanker

Symptomen bij borstkanker

Risicofactoren van borstkanker

Erfelijke aanleg voor borstkanker

Hormonen en borstkanker

Dicht borstklierweefsel

Bevolkingsonderzoek borstkanker

Overlevingscijfers borstkanker



## Persoonlijke gegevens

Als we praten over het aantal nieuwe patiënten met borstkanker, tonen wij altijd de aantallen voor de hele groep. Maar we kunnen ook rekening houden met een aantal persoonlijke kenmerken.

- Wanneer u het geslacht invult, ziet u ook de aantallen van alleen mannen of vrouwen.
- Wanneer u een geboortjaar invult, ziet u de aantallen van deze leeftijd.
- Wanneer u beide gegevens invult, ziet u de aantallen van mannen of vrouwen met de ingevulde leeftijd.

### Wat is uw geslacht?

### In welk jaar bent u geboren?

Translation:

**Personal data**

If we talk about the number of recently diagnosed patients with breast cancer, we always show group-based statistics. However, we can also take a number of personal characteristics into account. In case you enter your gender, you will only see statistics for either men or women. If you enter your year of birth, you will see the number of patients of that particular age. You can also enter both characteristics.

- What is your gender?
- What is your year of birth?

# Borstkanker

|                       |                                   |   |
|-----------------------|-----------------------------------|---|
| Algemeen              | Algemeen                          |   |
| Soorten               | Borstkanker                       | > |
| Onderzoek             | Symptomen bij borstkanker         | > |
| De diagnose           | Risicofactoren van borstkanker    | > |
| Behandeling           | Erfelijke aanleg voor borstkanker | > |
| Nieuwe ontwikkelingen | Hormonen en borstkanker           | > |
| Uitgezaaid            | Dicht borstklierweefsel           | > |
| Gevolgen              | Bevolkingsonderzoek borstkanker   | > |
| Niet meer             | Overlevingscijfers borstkanker    | > |



## Persoonlijke gegevens

Als we praten over het aantal nieuwe patiënten met borstkanker, tonen wij altijd de aantallen voor de hele groep. Maar we kunnen ook rekening houden met een aantal persoonlijke kenmerken.

- Wanneer u het geslacht invult, ziet u ook de aantallen van alleen mannen of vrouwen.
- Wanneer u een geboortjaar invult, ziet u de aantallen van deze leeftijd.
- Wanneer u beide gegevens invult, ziet u de aantallen van mannen of vrouwen met de ingevulde leeftijd.

### Wat is uw geslacht?

Vrouw

Man

Translation:

### Personal data

If we talk about the number of recently diagnosed patients with breast cancer, we always show group-based statistics. However, we can also take a number of personal characteristics into account. In case you enter your gender, you will only see statistics for either men or women. If you enter your year of birth, you will see the number of patients of that particular age. You can also enter both characteristics.

- What is your gender? (woman, men)
- What is your year of birth?



# Borstkanker

Algemeen

Soorten

Onderzoek

De diagnose

Behandeling

Nieuwe patiënten

Uitgezaaid

Gevolgen

Niet meer

Over de

Overlevingscijfers

Algemeen

Borstkanker

Symptomen bij borstkanker

Risicofactoren van borstkanker

Erfelijke aanleg voor borstkanker

Hormonen en borstkanker

Dicht borstklierweefsel

Bevolkingsonderzoek borstkanker

Overlevingscijfers borstkanker

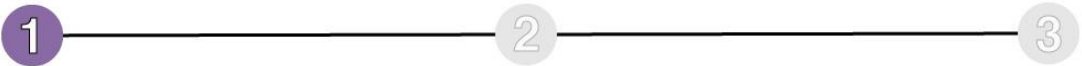

## Persoonlijke gegevens

Als we praten over het aantal nieuwe patiënten met borstkanker, tonen wij altijd de aantallen voor de hele groep. Maar we kunnen ook rekening houden met een aantal persoonlijke kenmerken.

- Wanneer u het geslacht invult, ziet u ook de aantallen van alleen mannen of vrouwen.
- Wanneer u een geboortjaar invult, ziet u de aantallen van deze leeftijd.
- Wanneer u beide gegevens invult, ziet u de aantallen van mannen of vrouwen met de ingevulde leeftijd.

### Wat is uw geslacht?

Vrouw

### In welk jaar bent u geboren?

Translation:

### Personal data

If we talk about the number of recently diagnosed patients with breast cancer, we always show group-based statistics. However, we can also take a number of personal characteristics into account. In case you enter your gender, you will only see statistics for either men or women. If you enter your year of birth, you will see the number of patients of that particular age. You can also enter both characteristics.

- What is your gender? (woman)
- What is your year of birth?



# Borstkanker

|                  |                                   |
|------------------|-----------------------------------|
| Algemeen         | Algemeen                          |
| Soorten          | Borstkanker                       |
| Onderzoek        | Symptomen bij borstkanker         |
| De diagnose      | Risicofactoren van borstkanker    |
| Behandeling      | Erfelijke aanleg voor borstkanker |
| Nieuwe patiënten | Hormonen en borstkanker           |
| Uitgezaaid       | Dicht borstklierweefsel           |
| Gevolgen         | Bevolkingsonderzoek borstkanker   |
| Niet meer        | Overlevingscijfers borstkanker    |
| Over de          |                                   |

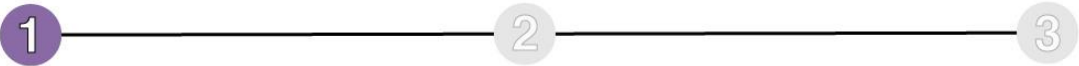

## Persoonlijke gegevens

Als we praten over het aantal nieuwe patiënten met borstkanker, tonen wij altijd de aantallen voor de hele groep. Maar we kunnen ook rekening houden met een aantal persoonlijke kenmerken.

- Wanneer u het geslacht invult, ziet u ook de aantallen van alleen mannen of vrouwen.
- Wanneer u een geboortjaar invult, ziet u de aantallen van deze leeftijd.
- Wanneer u beide gegevens invult, ziet u de aantallen van mannen of vrouwen met de ingevulde leeftijd.

### Wat is uw geslacht?

Vrouw

### In welk jaar bent u geboren?

1956

1955

1954

1953

1952

Vorige Volgende

Translation:

### Personal data

If we talk about the number of recently diagnosed patients with breast cancer, we always show group-based statistics. However, we can also take a number of personal characteristics into account. In case you enter your gender, you will only see statistics for either men or women. If you enter your year of birth, you will see the number of patients of that particular age. You can also enter both characteristics.

- What is your gender? (woman)
- What is your year of birth?

# Borstkanker

|                  |                                   |
|------------------|-----------------------------------|
| Algemeen         | Algemeen                          |
| Soorten          | Borstkanker                       |
| Onderzoek        | Symptomen bij borstkanker         |
| De diagnose      | Risicofactoren van borstkanker    |
| Behandeling      | Erfelijke aanleg voor borstkanker |
| Nieuwe patiënten | Hormonen en borstkanker           |
| Uitgezaaid       | Dicht borstklierweefsel           |
| Gevolgen         | Bevolkingsonderzoek borstkanker   |
| Niet meer        | Overlevingscijfers borstkanker    |
| Over de ziekte   |                                   |

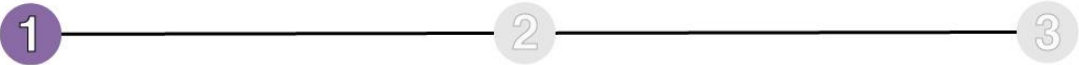

## Persoonlijke gegevens

Als we praten over het aantal nieuwe patiënten met borstkanker, tonen wij altijd de aantallen voor de hele groep. Maar we kunnen ook rekening houden met een aantal persoonlijke kenmerken.

- Wanneer u het geslacht invult, ziet u ook de aantallen van alleen mannen of vrouwen.
- Wanneer u een geboortjaar invult, ziet u de aantallen van deze leeftijd.
- Wanneer u beide gegevens invult, ziet u de aantallen van mannen of vrouwen met de ingevulde leeftijd.

### Wat is uw geslacht?

Vrouw

### In welk jaar bent u geboren?

1954

Vorige

Volgende

Translation:

Personal data

If we talk about the number of recently diagnosed patients with breast cancer, we always show group-based statistics. However, we can also take a number of personal characteristics into account. In case you enter your gender, you will only see statistics for either men or women. If you enter your year of birth, you will see the number of patients of that particular age. You can also enter both characteristics.

- What is your gender? (woman)
- What is your year of birth? (1954)



# Borstkanker

## Algemeen

### Algemeen

- Soorten Borstkanker >
- Onderzoek Symptomen bij borstkanker >
- De diagnose Risicofactoren van borstkanker >
- Behandeling Erfelijke aanleg voor borstkanker >
- Uitgezaaid Hormonen en borstkanker >
- Gevolgen Dicht borstklierweefsel >
- Niet meer Bevolkingsonderzoek borstkanker >
- Over de

1

2

3

## Gegevens over uw ziekte bij diagnose

We kunnen de cijfers nog meer op maat presenteren, wanneer u ook één of meerdere ziektekenmerken kunt invullen. Dit zijn gegevens over uw ziekte **bij diagnose**, zoals het stadium van de ziekte, en in welk jaar u de diagnose kreeg. Als u deze gegevens invult, kunnen wij overlevingscijfers tonen op basis van patiënten met ongeveer dezelfde ziektekenmerken bij diagnose. Ook nu is het belangrijk om na te denken of u wel cijfers wilt ontvangen op basis van deze gegevens. Als u bij alle kenmerken 'weet ik niet' invult, krijgt u de algemene cijfers te zien.

### In welk jaar kreeg u de diagnose?

### Wat was het stadium van de ziekte bij diagnose?

#### Diagnosejaar

Onze statistische berekeningen gaan uit van het jaar van de **eerste diagnose**. Het is belangrijk om die in te vullen. In de Nederlandse Kankerregistratie zijn beperkt gegevens vastgelegd over patiënten na hun diagnose. We weten wel wanneer iemand overlijdt en waaraan diegenen zijn overleden.

#### Stadium

Het stadium geeft aan hoever de ziekte zich in het lichaam heeft uitgebreid. De arts stelt het stadium vast. Bij borstkanker zijn er vier stadia.

**Stadium 1:** De tumor in de borst is kleiner dan 2 centimeter en er zijn geen uitzaaiingen in de lymfeklieren in de oksel. Er kunnen ook uitzaaiingen in de lymfeklieren van de oksel zitten, maar er zijn geen uitzaaiingen in andere organen.

**Stadium 2:** De tumor is tussen de 2 en 5 centimeter groot. Er kunnen ook uitzaaiingen in de lymfeklieren van de oksel of het borstbeen zitten, maar er zijn geen uitzaaiingen in andere organen.

Translation:

### Disease-related data

We can further personalize the statistics, for instance if you enter some disease-related characteristics **at your diagnosis**, such as the tumor stage, or the year of diagnosis. If you enter these data, we can show statistics based on patients like you with similar characteristics at their diagnosis. Again, please think about whether you really want to see personalized statistics. If you enter "I don't know" for each characteristic, you will only see the generic statistics.

- Year of diagnosis? (Our calculations are based on the first cancer diagnosis. It is important to fill out this one, because the Netherlands Cancer Registry contains limited data of patients after their diagnosis. However, the NCR does know when a patient died (and its cause)).
- Tumor stage at diagnosis? The tumor stage says something about how far the cancer has progressed. The doctor will determine the tumor stage. For breast cancer, there are four stages. **Stage 1:** the tumor is smaller than 2 cm but it has not spread to the nearby lymph nodes or to distant organs. **Stage 2:** the tumor size is between 2 and 5 cm, and may have spread to lymph nodes under the arm or near the breast bone, but not to distant organs.

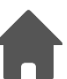

# Borstkanker

- Algemeen
- Soorten Borstkanker
- Onderzoek Symptomen bij borstkanker
- De diagnose Risicofactoren van borstkanker
- Behandeling Erfelijke aanleg voor borstkanker
- Nieuwe Hormonen en borstkanker
- Uitgezaaid Dicht borstklierweefsel
- Gevolgen Bevolkingsonderzoek borstkanker
- Overlevingscijfers borstkanker

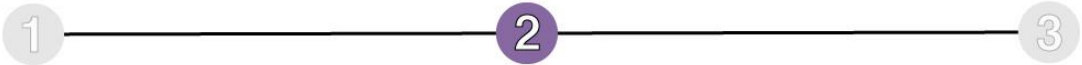

## Gegevens over uw ziekte bij diagnose

We kunnen de cijfers nog meer op maat presenteren, wanneer u ook één of meerdere ziektekenmerken kunt invullen. Dit zijn gegevens over uw ziekte **bij diagnose**, zoals het stadium van de ziekte, en in welk jaar u de diagnose kreeg. Als u deze gegevens invult, kunnen wij overlevingscijfers tonen op basis van patiënten met ongeveer dezelfde ziektekenmerken bij diagnose. Ook nu is het belangrijk om na te denken of u wel cijfers wilt ontvangen op basis van deze gegevens. Als u bij alle kenmerken ‘weet ik niet’ invult, krijgt u de algemene cijfers te zien.

### In welk jaar kreeg u de diagnose?

Weet ik niet

2019

2018

2017

2016

2015

**Diagnosejaar**  
Onze statistische berekeningen gaan uit van het jaar van de **eerste diagnose**. Het is belangrijk om die in te vullen. In de Nederlandse Kankerregistratie zijn beperkt gegevens vastgelegd over patiënten na hun diagnose. We weten wel wanneer iemand overlijdt en waaraan diegenen zijn overleden.

**Stadium**  
Het stadium geeft aan hoever de ziekte zich in het lichaam heeft uitgebreid. De arts stelt het stadium vast. Bij borstkanker zijn er vier stadia.

**Stadium 1:** De tumor in de borst is kleiner dan 2 centimeter en er zijn geen uitzaaiingen in de lymfeklieren in de oksel. Er kunnen ook uitzaaiingen in de lymfeklieren van de oksel zitten, maar er zijn geen uitzaaiingen in andere organen.

**Stadium 2:** De tumor is tussen de 2 en 5 centimeter groot. Er kunnen ook uitzaaiingen in de lymfeklieren van de oksel of het borstbeen zitten, maar er zijn geen uitzaaiingen in andere organen.

**Stadium 3:** De tumor is groter dan 5 centimeter.

Vorige

Toon de cijfers

# Borstkanker

|                       |                                   |
|-----------------------|-----------------------------------|
| Algemeen              | Algemeen                          |
| Soorten               | Borstkanker                       |
| Onderzoek             | Symptomen bij borstkanker         |
| De diagnose           | Risicofactoren van borstkanker    |
| Behandeling           | Erfelijke aanleg voor borstkanker |
| Nieuwe ontwikkelingen | Hormonen en borstkanker           |
| Uitgezaaid            | Dicht borstklierweefsel           |
| Gevolgen              | Bevolkingsonderzoek borstkanker   |
| Niet meer             |                                   |
| Over de ziekte        |                                   |

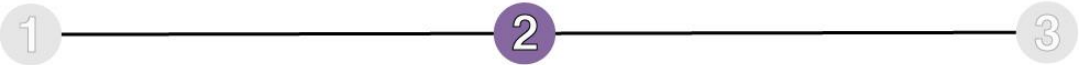

## Gegevens over uw ziekte bij diagnose

We kunnen de cijfers nog meer op maat presenteren, wanneer u ook één of meerdere ziektekenmerken kunt invullen. Dit zijn gegevens over uw ziekte **bij diagnose**, zoals het stadium van de ziekte, en in welk jaar u de diagnose kreeg. Als u deze gegevens invult, kunnen wij overlevingscijfers tonen op basis van patiënten met ongeveer dezelfde ziektekenmerken bij diagnose. Ook nu is het belangrijk om na te denken of u wel cijfers wilt ontvangen op basis van deze gegevens. Als u bij alle kenmerken ‘weet ik niet’ invult, krijgt u de algemene cijfers te zien.

In welk jaar kreeg u de diagnose?

2016

▼

Wat was het stadium van de ziekte bij diagnose?

▼

### Diagnosejaar

Onze statistische berekeningen gaan uit van het jaar van de **eerste diagnose**. Het is belangrijk om die in te vullen. In de Nederlandse Kankerregistratie zijn beperkt gegevens vastgelegd over patiënten na hun diagnose. We weten wel wanneer iemand overlijdt en waaraan diegenen zijn overleden.

### Stadium

Het stadium geeft aan hoever de ziekte zich in het lichaam heeft uitgebreid. De arts stelt het stadium vast. Bij borstkanker zijn er vier stadia.

**Stadium 1:** De tumor in de borst is kleiner dan 2 centimeter en er zijn geen uitzaaiingen in de lymfeklieren in de oksel. Er kunnen ook uitzaaiingen in de lymfeklieren van de oksel zitten, maar er zijn geen uitzaaiingen in andere organen.

**Stadium 2:** De tumor is tussen de 2 en 5 centimeter groot. Er kunnen ook uitzaaiingen in de lymfeklieren van de oksel of het borstbeen zitten, maar er zijn geen uitzaaiingen in andere organen.

- Translation:
- Disease-related data**
- Year of diagnosis? (2016)
  - Tumor stage at diagnosis?



# Borstkanker

|                      |                                   |
|----------------------|-----------------------------------|
| Algemeen             | Algemeen                          |
| Soorten              | Borstkanker                       |
| Onderzoek            | Symptomen bij borstkanker         |
| De diagnose          | Risicofactoren van borstkanker    |
| Behandeling          | Erfelijke aanleg voor borstkanker |
| Nieuwe behandelingen | Hormonen en borstkanker           |
| Uitgezaaid           | Dicht borstklierweefsel           |
| Gevolgen             | Bevolkingsonderzoek borstkanker   |
| Niet meer behandelen |                                   |
| Over de borstkanker  |                                   |

- **Stage 3:** the tumor is locally advanced. The tumor has progressed and is more likely to grow and spread. **Stage 4:** the tumor has spread to lymph nodes or to other parts of the body.

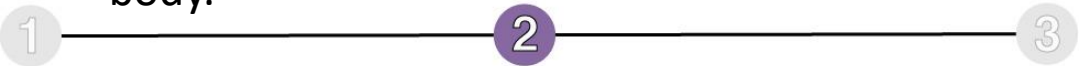

## Gegevens over uw ziekte bij diagnose

We kunnen de cijfers nog meer op maat presenteren, wanneer u ook één of meerdere ziektekenmerken kunt invullen. Dit zijn gegevens over uw ziekte **bij diagnose**, zoals het stadium van de ziekte, en in welk jaar u de diagnose kreeg. Als u deze gegevens invult, kunnen wij overlevingscijfers tonen op basis van patiënten met ongeveer dezelfde ziektekenmerken bij diagnose. Ook nu is het belangrijk om na te denken of u wel cijfers wilt ontvangen op basis van deze gegevens. Als u bij alle kenmerken ‘weet ik niet’ invult, krijgt u de algemene cijfers te zien.

### Wat was het stadium van de ziekte bij diagnose?

▼

|              |
|--------------|
| Stadium I    |
| Stadium II   |
| Stadium III  |
| Stadium IV   |
| Weet ik niet |

**Stadium**  
Het stadium geeft aan hoever de ziekte zich in het lichaam heeft uitgebreid. De arts stelt het stadium vast. Bij borstkanker zijn er vier stadia.

**Stadium 1:** De tumor in de borst is kleiner dan 2 centimeter en er zijn geen uitzaaiingen in de lymfeklieren in de oksel. Er kunnen ook uitzaaiingen in de lymfeklieren van de oksel zitten, maar er zijn geen uitzaaiingen in andere organen.

**Stadium 2:** De tumor is tussen de 2 en 5 centimeter groot. Er kunnen ook uitzaaiingen in de lymfeklieren van de oksel of het borstbeen zitten, maar er zijn geen uitzaaiingen in andere organen.

**Stadium 3:** De tumor is groter dan 5 centimeter. Er kunnen ook uitzaaiingen in de lymfeklieren van de oksel zitten. De tumor valt ook in stadium 3 als hij kleiner is dan 5 centimeter, maar door de huid van de borst naar buiten komt. Of als hij vastzit aan de wand van de borst. In beide gevallen is de kans groot dat er ook uitzaaiingen in andere delen van het lichaam zijn.

**Stadium 4:** Borstkanker met aangetoonde uitzaaiingen in andere delen van het lichaam.

Translation:

### Disease-related data

- Year of diagnosis? (2016)
- Tumor stage at diagnosis? (The tumor stage says something about how far the cancer has progressed. The doctor will determine the tumor stage. For breast cancer, there are four stages. **Stage 1:** the tumor is smaller than 2 cm but it has not spread to the nearby lymph nodes or to distant organs. **Stage 2:** the tumor size is between 2 and 5 cm, and may have spread to lymph nodes under the arm or near the breast bone, but not to distant organs. **Stage 3:** The size of the tumor is bigger than 5 cm, and it may have spread to the nearby lymph nodes under the arm. The tumor may also be smaller than 3 cm, but may have spread to the chest wall and/or skin of the breast. **Stage 4:** The tumor has spread beyond the breast and nearby lymph nodes to other organs of the body.



# Borstkanker

|                       |                                   |   |
|-----------------------|-----------------------------------|---|
| Algemeen              | Algemeen                          |   |
| Soorten               | Borstkanker                       | > |
| Onderzoek             | Symptomen bij borstkanker         | > |
| De diagnose           | Risicofactoren van borstkanker    | > |
| Behandeling           | Erfelijke aanleg voor borstkanker | > |
| Nieuwe ontwikkelingen | Hormonen en borstkanker           | > |
| Uitgezaaid            | Dicht borstklierweefsel           | > |
| Gevolgen              | Bevolkingsonderzoek borstkanker   | > |
| Niet meer             |                                   |   |
| Over de ziekte        |                                   |   |

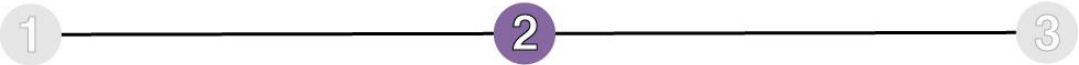

## Gegevens over uw ziekte bij diagnose

We kunnen de cijfers nog meer op maat presenteren, wanneer u ook één of meerdere ziektekenmerken kunt invullen. Dit zijn gegevens over uw ziekte **bij diagnose**, zoals het stadium van de ziekte, en in welk jaar u de diagnose kreeg. Als u deze gegevens invult, kunnen wij overlevingscijfers tonen op basis van patiënten met ongeveer dezelfde ziektekenmerken bij diagnose. Ook nu is het belangrijk om na te denken of u wel cijfers wilt ontvangen op basis van deze gegevens. Als u bij alle kenmerken ‘weet ik niet’ invult, krijgt u de algemene cijfers te zien.

### Wat was het stadium van de ziekte bij diagnose?

Stadium I

**Stadium**  
Het stadium geeft aan hoever de ziekte zich in het lichaam heeft uitgebreid. De arts stelt het stadium vast. Bij borstkanker zijn er vier stadia.

**Stadium 1:** De tumor in de borst is kleiner dan 2 centimeter en er zijn geen uitzaaiingen in de lymfeklieren in de oksel. Er kunnen ook uitzaaiingen in de lymfeklieren van de oksel zitten, maar er zijn geen uitzaaiingen in andere organen.

**Stadium 2:** De tumor is tussen de 2 en 5 centimeter groot. Er kunnen ook uitzaaiingen in de lymfeklieren van de oksel of het borstbeen zitten, maar er zijn geen uitzaaiingen in andere organen.

**Stadium 3:** De tumor is groter dan 5 centimeter. Er kunnen ook uitzaaiingen in de lymfeklieren van de oksel zitten. De tumor valt ook in stadium 3 als hij kleiner is dan 5 centimeter, maar door de huid van de borst naar buiten komt. Of als hij vastzit aan de wand van de borst. In beide gevallen is de kans groot dat er ook uitzaaiingen in andere delen van het lichaam zijn.

**Stadium 4:** Borstkanker met aangetoonde uitzaaiingen in andere delen van het lichaam.

- Translation:
- Disease-related data**
- Year of diagnosis? (2016)
  - Tumor stage at diagnosis? (stage I)

# Borstkanker

Algemeen

Algemeen

Soorten Borstkanker

Onderzoek Symptomen bij borstkanker

De diagnose Risicofactoren van borstkanker

Behandeling borstkanker

Nieuwe Erfelijke aanleg voor borstkanker

Uitgeza Hormonen en borstkanker

Gevolgen Dicht borstklierweefsel

Over de Bevolkingsonderzoek borstkanker

Overlevingscijfers borstkanker

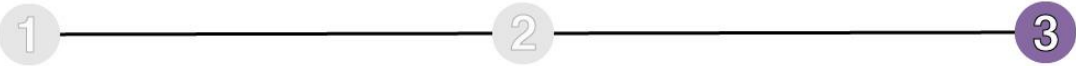

## Resultaten

Op deze pagina ziet u cijfers over borstkanker. U heeft aangegeven om gepersonaliseerde cijfers te ontvangen, zodat deze uw situatie meer benaderen.

De cijfers die wij tonen, zullen daarom gebaseerd zijn op **vrouwen** die op **65-jarige leeftijd** de diagnose borstkanker **stadium I** kregen.

- Hoeveel vrouwen kregen de diagnose borstkanker in 2016?
- Hoeveel vrouwen overleven borstkanker?

Het is belangrijk dat u nadenkt over wat u wil weten. Deze cijfers kunnen ‘goed’ nieuws bevatten maar ook ‘slecht’ nieuws. Wat iemand wil weten, verschilt per persoon.

Vorige

Translation:  
Results

On this page, you will see some breast cancer statistics. You have indicated to receive personalized statistics that are closer to your personal situation. For this reason, the statistics will be based on women **aged 65**, diagnosed with **breast cancer stage 1**.  
How many women were diagnosed with breast cancer in 2016?  
How many women survive breast cancer?

It is important that you think about what you would like to know. These statistics can contain ‘good’ but also ‘bad’ news. What someone wants to know differs per person.



# Borstkanker

|                       |                                   |   |
|-----------------------|-----------------------------------|---|
| Algemeen              | Algemeen                          |   |
| Soorten               | Borstkanker                       | > |
| Onderzoek             | Symptomen bij borstkanker         | > |
| De diagnose           | Risicofactoren van borstkanker    | > |
| Behandeling           | Erfelijke aanleg voor borstkanker | > |
| Nieuwe ontwikkelingen | Hormonen en borstkanker           | > |
| Uitgeval              | Dicht borstklierweefsel           | > |
| Gevolgen              | Bevolkingsonderzoek borstkanker   | > |
| Niet meer             |                                   |   |
| Over de               |                                   |   |
|                       | Overlevingscijfers borstkanker    | > |

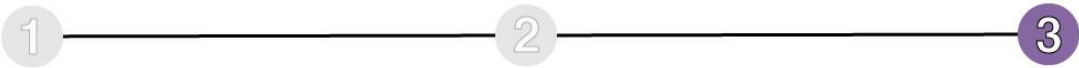

## Resultaten

Op deze pagina ziet u cijfers over borstkanker. U heeft aangegeven om gepersonaliseerde cijfers te ontvangen, zodat deze uw situatie meer benaderen.

De cijfers die wij tonen, zullen daarom gebaseerd zijn op **vrouwen** die op **65-jarige leeftijd** de diagnose borstkanker **stadium I** kregen.

Hoeveel vrouwen kregen de diagnose borstkanker in 2016?

In **2016** kregen in totaal 14.752 vrouwen de diagnose borstkanker. Als we rekening houden met de bovengenoemde kenmerken, kregen in 2016 81 vrouwen de diagnose borstkanker stadium I op 65-jarige leeftijd.

Hoeveel vrouwen overleven borstkanker?

Het is belangrijk dat u nadenkt over wat u wil weten. Deze cijfers kunnen 'goed' nieuws bevatten maar ook 'slecht' nieuws. Wat iemand wil weten, verschilt per persoon.

Vorige

Translation:  
In **2016**, in total 14.752 women were diagnosed with breast cancer. If we take the above mentioned characteristics into account, 81 women like you aged 65 were diagnosed with breast cancer stage I in 2016.



# Borstkanker

|                       |                                   |   |
|-----------------------|-----------------------------------|---|
| Algemeen              | Algemeen                          |   |
| Soorten               | Borstkanker                       | > |
| Onderzoek             | Symptomen bij borstkanker         | > |
| De diagnose           | Risicofactoren van borstkanker    | > |
| Behandeling           | Erfelijke aanleg voor borstkanker | > |
| Nieuwe ontwikkelingen | Hormonen en borstkanker           | > |
| Uitgezaaid            | Dicht borstklierweefsel           | > |
| Gevolgen              | Bevolkingsonderzoek borstkanker   | > |
| Niet meer behandeld   |                                   |   |
| Over de ziekte        |                                   |   |
|                       | Overlevingscijfers borstkanker    | > |

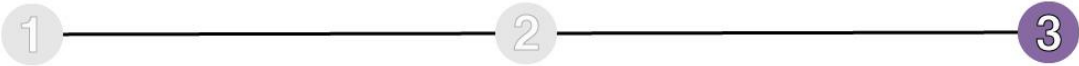

## Resultaten

Op deze pagina ziet u cijfers over borstkanker. U heeft aangegeven om gepersonaliseerde cijfers te ontvangen, zodat deze uw situatie meer benaderen.

De cijfers die wij tonen, zullen daarom gebaseerd zijn op **vrouwen** die op **65-jarige leeftijd** de diagnose borstkanker **stadium I** kregen.

- Hoeveel vrouwen kregen de diagnose borstkanker in 2016?
- Hoeveel vrouwen overleven borstkanker?

Het is belangrijk dat u nadenkt over wat u wil weten. Deze cijfers kunnen ‘goed’ nieuws bevatten maar ook ‘slecht’ nieuws. Wat iemand wil weten, verschilt per persoon.

Vorige

Translation:  
Results

On this page, you will see some breast cancer statistics. You have indicated to receive personalized statistics that are closer to your personal situation. For this reason, the statistics will be based on women **aged 65**, diagnosed with **breast cancer stage 1**.  
How many women were diagnosed with breast cancer in 2016?  
How many women survive breast cancer?

It is important that you think about what you would like to know. These statistics can contain ‘good’ but also ‘bad’ news. What someone wants to know differs per person.



# Borstkanker

|                       |                                   |   |
|-----------------------|-----------------------------------|---|
| Algemeen              | Algemeen                          |   |
| Soorten               | Borstkanker                       | > |
| Onderzoek             | Symptomen bij borstkanker         | > |
| De diagnose           | Risicofactoren van borstkanker    | > |
| Behandeling           | Erfelijke aanleg voor borstkanker | > |
| Nieuwe ontwikkelingen | Hormonen en borstkanker           | > |
| Uitgeval              | Dicht borstklierweefsel           | > |
| Gevolgen              | Bevolkingsonderzoek borstkanker   | > |
| Niet meer             |                                   |   |
| Over de               |                                   |   |

1

2

3

## Resultaten

Hoeveel vrouwen overleven borstkanker?

Met **overleving** bedoelen we hoeveel mensen met een bepaalde vorm van kanker na een bepaalde periode nog in leven zijn. In dit geval laten we zien hoeveel vrouwen met de diagnose borstkanker 5 jaar na diagnose nog in leven zijn.

Om betrouwbare getallen te geven, moet er gerekend worden met grote aantallen patiënten die in het verleden borstkanker hebben gehad. De cijfers die wij hier tonen zullen gebaseerd zijn op patiënten met de bovengenoemde kenmerken die tussen 2012 en 2017 de diagnose borstkanker kregen.

We laten eerst de kans op overleving zien van alle patiënten met borstkanker. 5 jaar na diagnose was ongeveer **88 procent** van de borstkanker patiënten nog in leven (88 van de 100 vrouwen).

We kunnen ook de kans op overleving laten zien van borstkanker patiënten die bij diagnose de bovengenoemde kenmerken hadden. 5 jaar na diagnose was ongeveer **89 procent** van deze patiënten nog in leven (89 van de 100 vrouwen).

Het is belangrijk dat u nadenkt over wat u wil weten. Deze cijfers kunnen 'goed' nieuws bevatten maar ook 'slecht' nieuws. Wat iemand wil weten, verschilt per persoon.

Vorige

Translation:

With **survival** we mean the percentage of people with cancer still alive after a particular amount of time. Here we will show you how many women are still alive 5 years after diagnosis.

In order to provide you with reliable statistics we need to perform statistics on a large group of patients that have been diagnosed with breast cancer in the past. The statistics that we show here are performed on data from patients diagnosed between 2012 and 2017.

We will first show you the chance of survival for all women with breast cancer. 5 years after diagnosis, about **88 percent** of these patients with breast cancer are alive (88 out of 100 women). We can also show you the chance of survival for women with breast cancer diagnosed with the above mentioned characteristics. 5 years after diagnosis, about **89 percent** of these patients with breast cancer are alive (89 out of 100 women).

80

# Borstkanker

|                       |                                   |
|-----------------------|-----------------------------------|
| Algemeen              | Algemeen                          |
| Soorten               | Borstkanker                       |
| Onderzoek             | Symptomen bij borstkanker         |
| De diagnose           | Risicofactoren van borstkanker    |
| Behandeling           | Erfelijke aanleg voor borstkanker |
| Nieuwe ontwikkelingen | Hormonen en borstkanker           |
| Uitgeval              | Dicht borstklierweefsel           |
| Gevolgen              | Bevolkingsonderzoek borstkanker   |
| Niet meer             |                                   |
| Over de               |                                   |

1

2

3

## Resultaten

patiënten met de bovengenoemde kenmerken die tussen 2012 en 2017 de diagnose borstkanker kregen.

We laten eerst de kans op overleving zien van alle patiënten met borstkanker. 5 jaar na diagnose was ongeveer **88 procent** van de borstkanker patiënten nog in leven (88 van de 100 vrouwen).

We kunnen ook de kans op overleving laten zien van borstkanker patiënten die bij diagnose de bovengenoemde kenmerken hadden. 5 jaar na diagnose was ongeveer **89 procent** van deze patiënten nog in leven (89 van de 100 vrouwen).

Het is belangrijk om te weten dat uw vooruitzichten nog steeds beter of slechter kunnen zijn dan de vooruitzichten voor deze specifieke groep. Bespreek uw vooruitzichten met uw arts.

Figuur

Verbeterd de kans op overleving met elk overleefd jaar?

Het is belangrijk dat u nadenkt over wat u wil weten. Deze cijfers kunnen 'goed' nieuws bevatten maar ook 'slecht' nieuws. Wat iemand wil weten, verschilt per persoon.

Vorige

Translation:

We will first show you the chance of survival for all women with breast cancer. 5 years after diagnosis, about **88 percent** of these patients with breast cancer are alive (88 out of 100 women). We can also show you the chance of survival for women with breast cancer diagnosed with the above mentioned characteristics. 5 years after diagnosis, about **89 percent** of these patients with breast cancer are alive (89 out of 100 women). It is important to know that your prognosis can still be better or worse than the prognosis of this specific group of patients. Discuss your prognosis with your doctor.

Figure

What is the survival statistic after having survived a period of time?

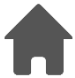

# Borstkanker

## Algeme

## Algemeen

Soorten Borstkanker

Onderzoek      Symptomen bij  
borstkanker

De diag

Behand      borstkanker

Nieuwe Erfelijke aanleg voor borstkanker

Uitgeza

Gevolge Hormonen en borstkanker

Niet me Dicht borstklierweefsel

Over de Bevolkingsonderzoek  
borstkanker

2

3

## Resultaten

## Figuur

### 5 jaar na diagnose

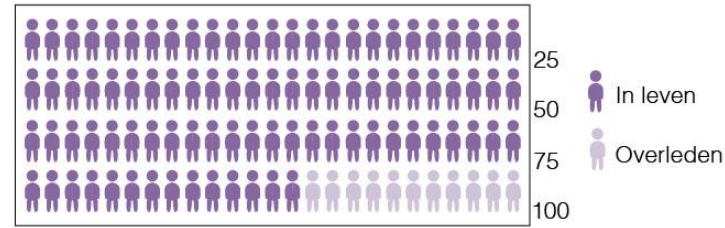

De figuur hiernaast toont de **5-jaarsoverleving** van borstkanker patiënten met bovengenoemde kenmerken. U kunt het type figuur aanpassen naar uw wensen.

### Verbeterd de kans op overleving met elk overleefd jaar?

## Toelichting op de cijfers

Het is belangrijk dat u nadenkt over wat u wil weten. Deze cijfers kunnen 'goed' nieuws bevatten maar ook 'slecht' nieuws. Wat iemand wil weten, verschilt per persoon.

**Vorige**

Translation:

This figure shows the **5 year survival statistic** for breast cancer with the above mentioned characteristics. You can change the type of figure.

In leven = are alive

Overleden = die



# Borstkanker

- Algemeen
- Soorten Borstkanker >
- Onderzoek Symptomen bij borstkanker >
- De diagnose Risicofactoren van borstkanker >
- Behandeling Erfelijke aanleg voor borstkanker >
- Uitgezaaid Hormonen en borstkanker >
- Gevolgen Dicht borstklierweefsel >
- Niet meer Bevolkingsonderzoek borstkanker >
- Over de

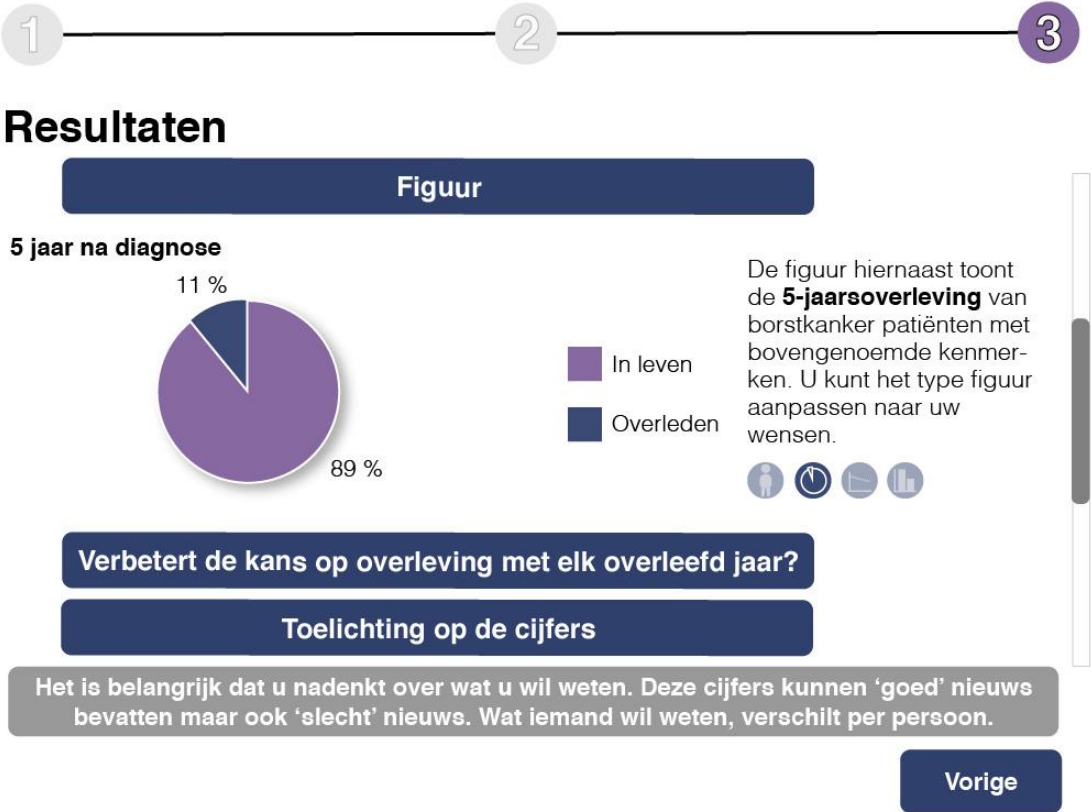

Translation:  
This figure shows the **5 year survival statistic** for breast cancer with the above mentioned characteristics. You can change the type of figure.  
In leven = are alive  
Overleden = die

# Borstkanker

|                       |                                   |
|-----------------------|-----------------------------------|
| Algemeen              | Algemeen                          |
| Soorten               | Borstkanker                       |
| Onderzoek             | Symptomen bij borstkanker         |
| De diagnose           | Risicofactoren van borstkanker    |
| Behandeling           | Erfelijke aanleg voor borstkanker |
| Nieuwe ontwikkelingen | Hormonen en borstkanker           |
| Uitgezaaid            | Dicht borstklierweefsel           |
| Gevolgen              | Bevolkingsonderzoek borstkanker   |

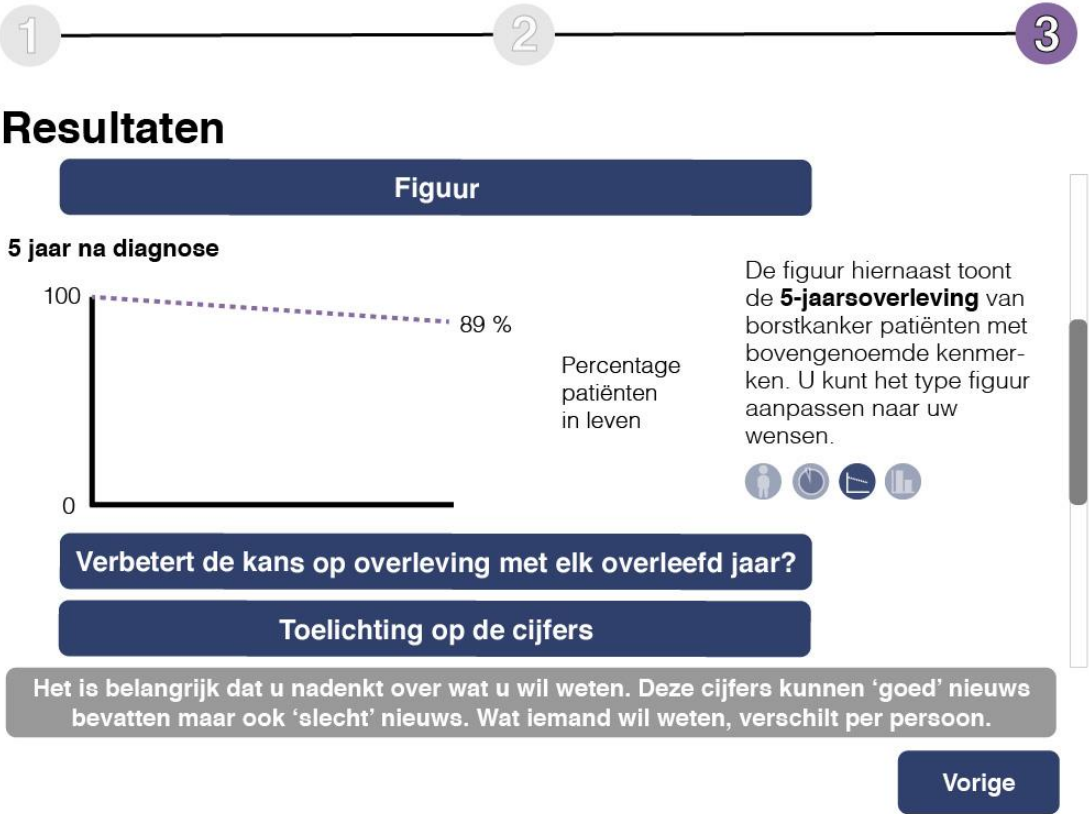

Translation:  
This figure shows the **5 year survival statistic** for breast cancer with the above mentioned characteristics. You can change the type of figure.  
In leven = are alive  
Overleden = die

# Borstkanker

- Algemeen
- Soorten Borstkanker >
- Onderzoek Symptomen bij borstkanker >
- De diagnose Risicofactoren van borstkanker >
- Behandeling Erfelijke aanleg voor borstkanker >
- Uitgezaaid Hormonen en borstkanker >
- Gevolgen Dicht borstklierweefsel >
- Niet meer Bevolkingsonderzoek borstkanker >
- Over de

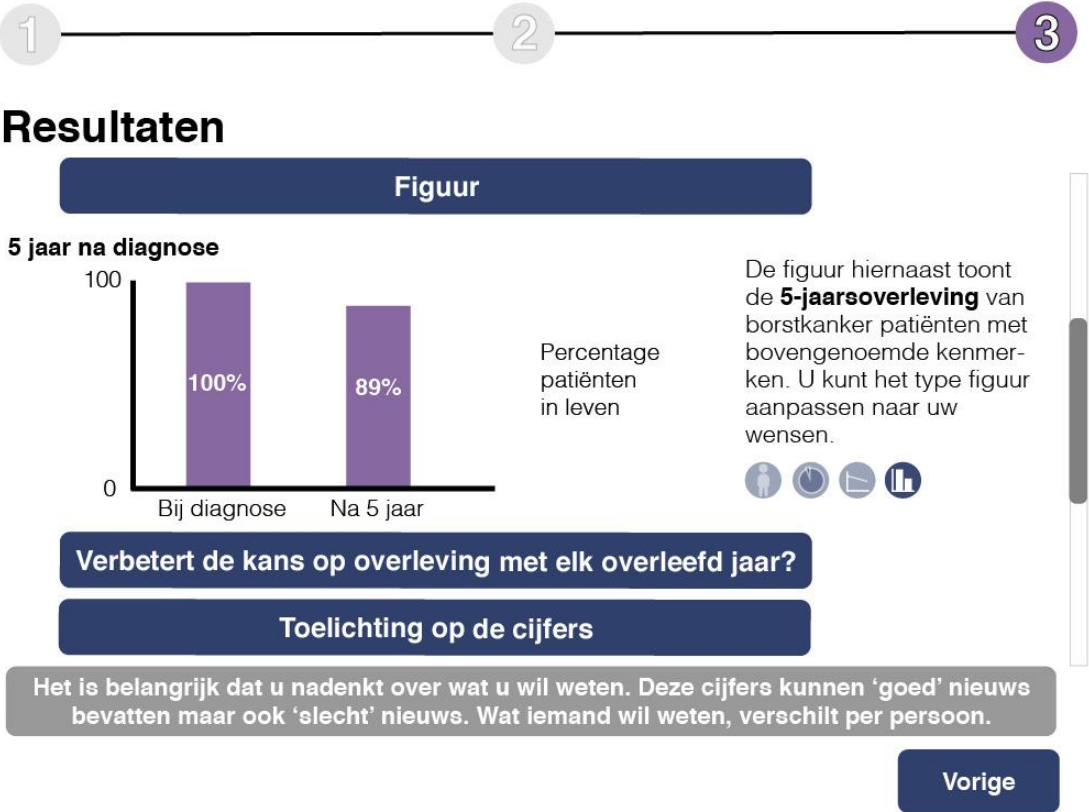

Translation:  
This figure shows the **5 year survival statistic** for breast cancer with the above mentioned characteristics. You can change the type of figure.  
In leven = are alive  
Overleden = die

# Borstkanker

Algemeen

Soorten

Onderzoek

De diagnose

Behandeling

Nieuwe behandelingen

Uitgezaaid

Gevolgen

Niet meer behandelen

Over de ziekte

Overlevingscijfers borstkanker

Algemeen

Borstkanker

Symptomen bij borstkanker

Risicofactoren van borstkanker

Erfelijke aanleg voor borstkanker

Hormonen en borstkanker

Dicht borstklierweefsel

Bevolkingsonderzoek borstkanker

Overlevingscijfers borstkanker

1

2

3

## Resultaten

Verbetert de kans op overleving met elk overleefd jaar?

Veel kankerpatiënten die hun ziekte reeds enige tijd hebben overleefd, willen graag weten wat hun vooruitzichten zijn gelet op het feit dat ze nog (steeds) in leven zijn. Dit wordt 'conditionele overleving' genoemd. De overlevingscijfers worden vaak beter met ieder jaar dat de patiënt overleeft.

Van de patiënten met bovengenoemde kenmerken die 3 jaar na diagnose nog leefden, was de kans dat zij 5 jaar na diagnose nog in leven waren **gestegen van 89 procent naar 98 procent** (98 van de 100 vrouwen).

Toelichting op de cijfers

Het is belangrijk dat u nadenkt over wat u wil weten. Deze cijfers kunnen 'goed' nieuws bevatten maar ook 'slecht' nieuws. Wat iemand wil weten, verschilt per persoon.

Vorige

Translation:

Many patients with cancer who have survived for a couple of years want to know the chance that they will survive another x years (given that they are still alive). We call this conditional survival. In general, for cancer patients who have already survived a number of years, survival expectations at diagnosis are typically more favorable. Of those patients like you who were still alive 3 years after diagnosis, the chance that they would still be alive 5 years after diagnosis increased from **89 percent to 98 percent** (98 out of 100 women).

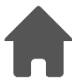

# Borstkanker

Algemeen

Soorten

Onderzoek

De diagnose

Behandeling

Nieuwe inzichten

Uitgevalde patiënten

Gevolgen

Niet meer behandeld

Over de cijfers

Algemeen

Borstkanker

Symptomen bij borstkanker

Risicofactoren van borstkanker

Erfelijke aanleg voor borstkanker

Hormonen en borstkanker

Dicht borstklierweefsel

Bevolkingsonderzoek borstkanker

Overlevingscijfers borstkanker

1

2

3

## Resultaten

man vooruitzichten zijn gericht op het feit dat ze nog (steeds) in leven zijn. Dit wordt 'conditionele overleving' genoemd. De overlevingscijfers worden vaak beter met ieder jaar dat de patiënt overleeft.

Van de patiënten met bovengenoemde kenmerken die 3 jaar na diagnose nog leefden, was de kans dat zij 5 jaar na diagnose nog in leven waren **gestegen van 89 procent naar 98 procent** (98 van de 100 vrouwen).

### Toelichting op de cijfers

Bovenstaande cijfers zijn afkomstig uit de Nederlandse Kankerregistratie (NKR). Deze database bevat betrouwbare en objectieve gegevens over het voorkomen en de overleving van alle diagnoses kanker in Nederland. Het Integraal Kankercentrum Nederland (IKCN) beheert deze database.

Bovenstaande cijfers zijn tot en met 2017. Meer recente cijfers zijn op dit moment niet beschikbaar. De veranderingen per jaar zijn meestal gering. Bovenstaande cijfers kunnen een indruk geven voor latere jaren.

Het is belangrijk dat u nadenkt over wat u wil weten. Deze cijfers kunnen 'goed' nieuws bevatten maar ook 'slecht' nieuws. Wat iemand wil weten, verschilt per persoon.

Vorige

Translation:

About the statistics

The statistics that we show are based on data from the Netherlands Cancer Registry (NCR). This database contains reliable and objective data about the prevalence and survival of all cancer patients in the Netherlands. The Netherlands Comprehensive Cancer Organisation hosts this database.

The statistics that we showed are until 2017. More recent statistics are currently not available. However, annual changes are typically limited. The statistics provided here may therefore give an impression for future years.

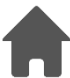

# Example 4: breast cancer

- Survival statistic: Less favorable
- Version: Short and concise version



# Borstkanker

|                      |                                   |   |
|----------------------|-----------------------------------|---|
| Algemeen             | Algemeen                          |   |
| Soorten              | Borstkanker                       | > |
| Onderzoek            | Symptomen bij borstkanker         | > |
| De diagnose          | Risicofactoren van borstkanker    | > |
| Behandeling          | Erfelijke aanleg voor borstkanker | > |
| Nieuwe behandelingen | Hormonen en borstkanker           | > |
| Uitgezaaid           | Dicht borstklierweefsel           | > |
| Gevolgen             | Bevolkingsonderzoek borstkanker   | > |
| Niet meer behandelen | Overlevingscijfers borstkanker    | > |

## Overlevingscijfers borstkanker

De volgende pagina's geven cijfers over borstkanker. U kunt zien hoeveel mensen jaarlijks borstkanker krijgen en hoeveel mensen deze ziekte overleven. De statistische berekeningen worden gedaan met de gegevens uit de Nederlandse Kankerregistratie (NKR).

Als u vragen heeft, is het belangrijk om de betreffende pagina te printen en mee te nemen naar het ziekenhuis, zodat u de informatie kunt bespreken met uw arts.

Volgende

Translation:  
**Survival statistics breast cancer**  
The next pages will show you statistics about breast cancer. You will see how many women are diagnosed with breast cancer, and how many of these women will survive breast cancer. The statistics are based on data from the Netherlands Cancer Registry (NCR).

If you have any questions, you could always print the respective pages and take them with you to the next visit with your doctor, so you can discuss the results with him/her.



# Borstkanker

Algemeen

Soorten

Onderzoek

De diagnose

Behandeling

Nieuwe behandelingen

Uitgezaaid

Gevolgen

Niet meer

Over de ziekte

Overlevingscijfers

Algemeen

Borstkanker

Symptomen bij borstkanker

Risicofactoren van borstkanker

Erfelijke aanleg voor borstkanker

Hormonen en borstkanker

Dicht borstklierweefsel

Bevolkingsonderzoek borstkanker

Overlevingscijfers borstkanker

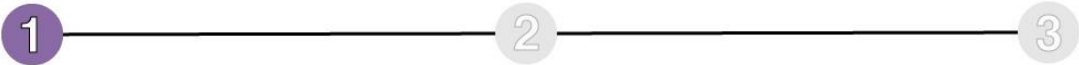

## Belangrijk om te weten voordat u verder gaat:

- Het is belangrijk dat u nadenkt over wat u wilt weten. Deze cijfers kunnen ‘goed’ nieuws bevatten maar ook ‘slecht’ nieuws. Wat iemand wil weten, verschilt per persoon.
- Alle getallen die wij geven, zijn gebaseerd op het verloop in het verleden. Onder invloed van betere diagnostiek en behandelingen, kunnen overlevingskansen voor huidige en toekomstige patiënten beter zijn dan de cijfers die wij hier tonen.
- Het lijkt soms alsof wij het heel ‘precies’ weten. Er is echter altijd sprake van onzekerheid. Hoe kleiner de aantallen, hoe groter de onzekerheid over het getal.

Translation:

**Important to know before you continue:**

- It is important that you think about what you want to know. These statistics may contain ‘good’ or ‘bad’ news. What someone wants to know, differs per person.
- All statistics that we provide are based on what happened in the past. Given the improvements in terms of diagnosis and treatments, the survival statistics for recently diagnosed and future patients may be better than those statistics that we show here.
- It may seem that we know everything without any uncertainty. However, there is always uncertainty around statistics.

# Borstkanker

|                       |                                   |
|-----------------------|-----------------------------------|
| Algemeen              | Algemeen                          |
| Soorten               | Borstkanker                       |
| Onderzoek             | Symptomen bij borstkanker         |
| De diagnose           | Risicofactoren van borstkanker    |
| Behandeling           | Erfelijke aanleg voor borstkanker |
| Nieuwe ontwikkelingen | Hormonen en borstkanker           |
| Uitgezaaid            | Dicht borstklierweefsel           |
| Gevolgen              | Bevolkingsonderzoek borstkanker   |
| Niet meer behandeld   | Overlevingscijfers borstkanker    |

1

2

3

Wilt u liever algemene cijfers zien, of gepersonaliseerde cijfers?

Algemene cijfers

Gepersonaliseerde cijfers

Translation:  
Would you like to generic statistics, or personalized statistics?

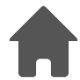

# Borstkanker

|                      |                                   |   |
|----------------------|-----------------------------------|---|
| Algemeen             | Algemeen                          |   |
| Soorten              | Borstkanker                       | > |
| Onderzoek            | Symptomen bij borstkanker         | > |
| De diagnose          | Risicofactoren van borstkanker    | > |
| Behandeling          | Erfelijke aanleg voor borstkanker | > |
| Nieuwe behandelingen | Hormonen en borstkanker           | > |
| Uitgezaaid           | Dicht borstklierweefsel           | > |
| Gevolgen             | Bevolkingsonderzoek borstkanker   | > |
| Niet meer behandelen | Overlevingscijfers borstkanker    | > |



## Persoonlijke gegevens

Wat is uw geslacht?

In welk jaar bent u geboren?

Translation:  
Personal data

- What is your gender?
- What is your year of birth?

# Borstkanker

|                       |                                   |   |
|-----------------------|-----------------------------------|---|
| Algemeen              | Algemeen                          |   |
| Soorten               | Borstkanker                       | > |
| Onderzoek             | Symptomen bij borstkanker         | > |
| De diagnose           | Risicofactoren van borstkanker    | > |
| Behandeling           | Erfelijke aanleg voor borstkanker | > |
| Nieuwe ontwikkelingen | Hormonen en borstkanker           | > |
| Uitgezaaid            | Dicht borstklierweefsel           | > |
| Gevolgen              | Bevolkingsonderzoek borstkanker   | > |
| Niet meer behandeld   | Overlevingscijfers borstkanker    | > |



## Persoonlijke gegevens

Wat is uw geslacht?

|       |   |
|-------|---|
|       | ▼ |
| Vrouw |   |
| Man   |   |

Vorige

Volgende

- Translation:
- Personal data**
- What is your gender? (woman, man)
  - What is your year of birth?

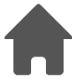

# Borstkanker

|                      |                                   |   |
|----------------------|-----------------------------------|---|
| Algemeen             | Algemeen                          |   |
| Soorten              | Borstkanker                       | > |
| Onderzoek            | Symptomen bij borstkanker         | > |
| De diagnose          | Risicofactoren van borstkanker    | > |
| Behandeling          | Erfelijke aanleg voor borstkanker | > |
| Nieuwe behandelingen | Hormonen en borstkanker           | > |
| Uitgezaaid           | Dicht borstklierweefsel           | > |
| Gevolgen             | Bevolkingsonderzoek borstkanker   | > |
| Niet meer behandelen | Overlevingscijfers borstkanker    | > |

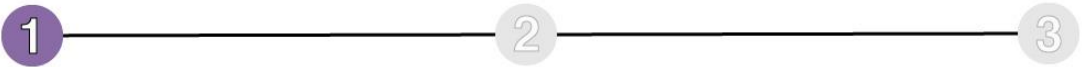

## Persoonlijke gegevens

Wat is uw geslacht?

Vrouw

In welk jaar bent u geboren?

Vorige Volgende

Translation:

**Personal data**

- What is your gender? (woman)
- What is your year of birth?

# Borstkanker

|                       |                                   |   |
|-----------------------|-----------------------------------|---|
| Algemeen              | Algemeen                          |   |
| Soorten               | Borstkanker                       | > |
| Onderzoek             | Symptomen bij borstkanker         | > |
| De diagnose           | Risicofactoren van borstkanker    | > |
| Behandeling           | Erfelijke aanleg voor borstkanker | > |
| Nieuwe ontwikkelingen | Hormonen en borstkanker           | > |
| Uitgezaaid            | Dicht borstklierweefsel           | > |
| Gevolgen              | Bevolkingsonderzoek borstkanker   | > |
| Niet meer behandelen  | Overlevingscijfers borstkanker    | > |

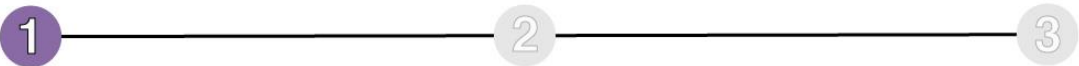

## Persoonlijke gegevens

**Wat is uw geslacht?**

Vrouw

**In welk jaar bent u geboren?**

1970

1969

1968

1967

1966

Vorige Volgende

- Translation:
- Personal data**
- What is your gender? (woman)
  - What is your year of birth?

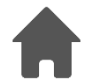

# Borstkanker

|                      |                                   |   |
|----------------------|-----------------------------------|---|
| Algemeen             | Algemeen                          |   |
| Soorten              | Borstkanker                       | > |
| Onderzoek            | Symptomen bij borstkanker         | > |
| De diagnose          | Risicofactoren van borstkanker    | > |
| Behandeling          | Erfelijke aanleg voor borstkanker | > |
| Nieuwe behandelingen | Hormonen en borstkanker           | > |
| Uitgezaaid           | Dicht borstklierweefsel           | > |
| Gevolgen             | Bevolkingsonderzoek borstkanker   | > |
| Niet meer behandelen | Overlevingscijfers borstkanker    | > |

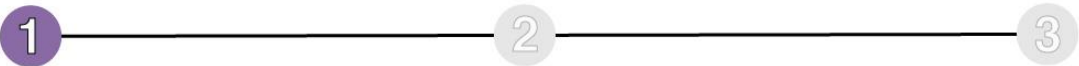

## Persoonlijke gegevens

**Wat is uw geslacht?**

Vrouw

**In welk jaar bent u geboren?**

1969

Vorige Volgende

- Translation:
- Personal data**
- What is your gender? (woman)
  - What is your year of birth? (1969)



# Borstkanker

|                       |                                   |   |
|-----------------------|-----------------------------------|---|
| Algemeen              | Algemeen                          |   |
| Soorten               | Borstkanker                       | > |
| Onderzoek             | Symptomen bij borstkanker         | > |
| De diagnose           | Risicofactoren van borstkanker    | > |
| Behandeling           | Erfelijke aanleg voor borstkanker | > |
| Nieuwe ontwikkelingen | Hormonen en borstkanker           | > |
| Uitgezaaid            | Dicht borstklierweefsel           | > |
| Gevolgen              | Bevolkingsonderzoek borstkanker   | > |
| Niet meer             | Overlevingscijfers borstkanker    | > |

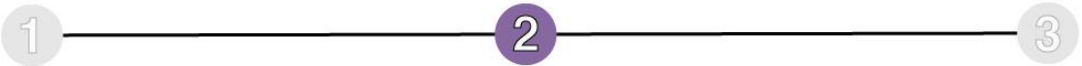

## Gegevens over uw ziekte bij diagnose

In welk jaar kreeg u de diagnose?

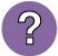

Wat was het stadium van de ziekte bij diagnose?

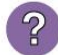

Vorige

Toon de cijfers

- Translation:
- Disease-related data**
- Year of diagnosis?
  - Tumor stage at diagnosis?

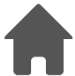

# Borstkanker

|                      |                                   |   |
|----------------------|-----------------------------------|---|
| Algemeen             | Algemeen                          |   |
| Soorten              | Borstkanker                       | > |
| Onderzoek            | Symptomen bij borstkanker         | > |
| De diagnose          | Risicofactoren van borstkanker    | > |
| Behandeling          | Erfelijke aanleg voor borstkanker | > |
| Nieuwe behandelingen | Hormonen en borstkanker           | > |
| Uitgezaaid           | Dicht borstklierweefsel           | > |
| Gevolgen             | Bevolkingsonderzoek borstkanker   | > |
| Niet meer ziek       |                                   |   |
| Over de cijfers      |                                   |   |
|                      | Overlevingscijfers                | > |

1

2

3

## Gegevens over uw ziekte bij diagnose

In welk jaar kreeg u de diagnose?

▼

Wat was het stadium van de ziekte bij diagnose?

▼

?

Diagnosejaar

Onze statistische berekeningen gaan uit van het jaar van de eerste diagnose. Het is belangrijk om die in te vullen. In de Nederlandse Kankerregistratie zijn beperkt gegevens vastgelegd over patiënten na hun diagnose. We weten wel wanneer iemand overlijdt en waaraan diegenen zijn overleden.

Vorige

Toon de cijfers

- Translation:
- Disease-related data**
- Year of diagnosis? (Our calculations are based on the first cancer diagnosis. It is important to fill out this one, because the Netherlands Cancer Registry contains limited data of patients after their diagnosis. However, the NCR does know when a patient died (and its cause)).
  - Tumor stage at diagnosis?

# Borstkanker

- Algemeen
- Soorten Borstkanker >
- Onderzoek Symptomen bij borstkanker >
- De diagnose Risicofactoren van borstkanker >
- Behandeling Erfelijke aanleg voor borstkanker >
- Nieuwe Uitgeza Hormonen en borstkanker >
- Gevolgen Dicht borstklierweefsel >
- Niet meer Bevolkingsonderzoek borstkanker >
- Overlevingscijfers >



## Gegevens over uw ziekte bij diagnose

In welk jaar kreeg u de diagnose?

▼

Weet ik niet

2019

2018

2017

2016

2015

?  
ose?  
?

Vorige Toon de cijfers

Translation:  
**Disease-related data**  
• Year of diagnosis?



# Borstkanker

|                       |                                   |   |
|-----------------------|-----------------------------------|---|
| Algemeen              | Algemeen                          |   |
| Soorten               | Borstkanker                       | > |
| Onderzoek             | Symptomen bij borstkanker         | > |
| De diagnose           | Risicofactoren van borstkanker    | > |
| Behandeling           | Erfelijke aanleg voor borstkanker | > |
| Nieuwe ontwikkelingen | Hormonen en borstkanker           | > |
| Uitgezaaid            | Dicht borstklierweefsel           | > |
| Gevolgen              | Bevolkingsonderzoek borstkanker   | > |
| Niet meer             |                                   |   |
| Over de cijfers       |                                   |   |
|                       | Overlevingscijfers                | > |

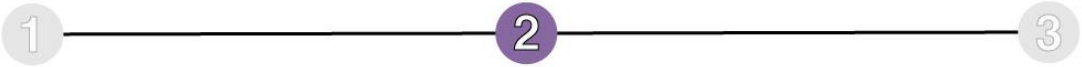

## Gegevens over uw ziekte bij diagnose

In welk jaar kreeg u de diagnose?

2015

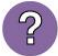

Wat was het stadium van de ziekte bij diagnose?

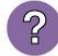

Vorige Toon de cijfers

- Translation:
- Disease-related data**
- Year of diagnosis? (2015)
  - Tumor stage at diagnosis?



# Borstkanker

|                       |                                   |
|-----------------------|-----------------------------------|
| Algemeen              | Algemeen                          |
| Soorten               | Borstkanker                       |
| Onderzoek             | Symptomen bij borstkanker         |
| De diagnose           | Risicofactoren van borstkanker    |
| Behandeling           | Erfelijke aanleg voor borstkanker |
| Nieuwe ontwikkelingen | Hormonen en borstkanker           |
| Uitgezaaid            | Dicht borstklierweefsel           |
| Gevolgen              | Bevolkingsonderzoek borstkanker   |
| Niet meten            |                                   |
| Over de borstkanker   |                                   |

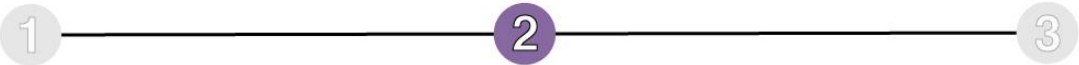

## Gegevens over uw ziekte bij diagnose

In welk jaar kreeg u de diagnose?

2015

Wat was het stadium van de ziekte bij diagnose?

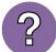

**Stadium**  
Het stadium geeft aan hoever de ziekte zich in het lichaam heeft uitgebreid. De arts stelt het stadium vast. Bij borstkanker zijn er vier stadia.

**Stadium 1:** De tumor in de borst is kleiner dan 2 centimeter en er zijn geen uitzaaiingen in de lymfeklieren in de oksel. Er kunnen ook uitzaaiingen in de lymfeklieren van de oksel zitten, maar er zijn geen uitzaaiingen in andere organen.

**Stadium 2:** De tumor is tussen de 2 en 5 centimeter groot. Er kunnen ook uitzaaiingen in de lymfeklieren van de oksel of het borstbeen zitten, maar er zijn geen uitzaaiingen in andere organen.

**Stadium 3:** De tumor is groter dan 5 centimeter. Er kunnen ook uitzaaiingen in de lymfeklieren van de oksel zitten. De tumor valt ook in stadium 3 als hij kleiner is dan 5 centimeter, maar door de huid van de borst naar buiten komt. Of als hij vastzit aan de wand van de borst. In beide gevallen is de kans groot dat er ook uitzaaiingen in andere delen van het lichaam zijn.

**Stadium 4:** Borstkanker met aangetoonde uitzaaiingen in andere delen van het lichaam.

Translation:

Disease-related data

- Year of diagnosis? (2015)
- Tumor stage at diagnosis? (The tumor stage says something about how far the cancer has progressed. The doctor will determine the tumor stage. For breast cancer, there are four stages. **Stage 1:** the tumor is smaller than 2 cm but it has not spread to the nearby lymph nodes or to distant organs. **Stage 2:** the tumor size is between 2 and 5 cm, and may have spread to lymph nodes under the arm or near the breast bone, but not to distant organs. **Stage 3:** The size of the tumor is bigger than 5 cm, and it may have spread to the nearby lymph nodes under the arm. The tumor may also be smaller than 3 cm, but may have spread to the chest wall and/or skin of the breast. **Stage 4:** The tumor has spread beyond the breast and nearby lymph nodes to other organs of the body.



# Borstkanker

|                      |                                   |   |
|----------------------|-----------------------------------|---|
| Algemeen             | Algemeen                          |   |
| Soorten              | Borstkanker                       | > |
| Onderzoek            | Symptomen bij borstkanker         | > |
| De diagnose          | Risicofactoren van borstkanker    | > |
| Behandeling          | Erfelijke aanleg voor borstkanker | > |
| Nieuwe behandelingen | Hormonen en borstkanker           | > |
| Uitgeval             | Dicht borstklierweefsel           | > |
| Gevolgen             | Bevolkingsonderzoek borstkanker   | > |
| Niet meer behandelen |                                   |   |
| Over de borstkanker  |                                   |   |
|                      | Overlevingscijfers                | > |

1

2

3

## Gegevens over uw ziekte bij diagnose

In welk jaar kreeg u de diagnose?

2015

▼

?

Wat was het stadium van de ziekte bij diagnose?

▼

?

Stadium I

Stadium II

Stadium III

Stadium IV

Weet ik niet

Vorige

Toon de cijfers

Translation:

**Disease-related data**

- Year of diagnosis? (2015)
- Tumor stage at diagnosis? (Stage I, Stage II, Stage III, Stage IV)

# Borstkanker

| Algemeen              | Algemeen                          |   |
|-----------------------|-----------------------------------|---|
| Soorten               | Borstkanker                       | > |
| Onderzoek             | Symptomen bij borstkanker         | > |
| De diagnose           | Risicofactoren van borstkanker    | > |
| Behandeling           | Erfelijke aanleg voor borstkanker | > |
| Nieuwe ontwikkelingen | Hormonen en borstkanker           | > |
| Uitgezaaid            | Dicht borstklierweefsel           | > |
| Gevolgen              | Bevolkingsonderzoek borstkanker   | > |
| Niet meer             |                                   |   |
| Over de               |                                   |   |

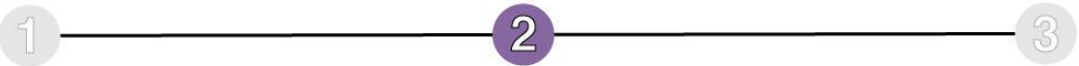

## Gegevens over uw ziekte bij diagnose

In welk jaar kreeg u de diagnose?

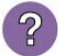

Wat was het stadium van de ziekte bij diagnose?

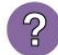

Waren er uitzaaiingen gevonden bij diagnose?

Vorige

Toon de cijfers

Translation:

### Disease-related data

- Year of diagnosis? (2015)
- Tumor stage at diagnosis? (I don't know)
  - Did the tumor spread to any nearby lymph nodes or other parts of the body?



# Borstkanker

| Algemeen             | Algemeen                            |
|----------------------|-------------------------------------|
| Soorten              | Borstkanker >                       |
| Onderzoek            | Symptomen bij borstkanker >         |
| De diagnose          | Risicofactoren van borstkanker >    |
| Behandeling          | Erfelijke aanleg voor borstkanker > |
| Nieuwe behandelingen | Hormonen en borstkanker >           |
| Uitgezaaid           | Dicht borstklierweefsel >           |
| Gevolgen             | Bevolkingsonderzoek borstkanker >   |
| Niet meer behandelen |                                     |
| Over de borstkanker  |                                     |

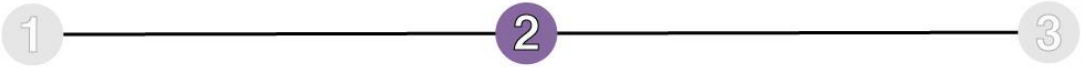

## Gegevens over uw ziekte bij diagnose

In welk jaar kreeg u de diagnose?

2015

▼

?

Wat was het stadium van de ziekte bij diagnose?

Weet ik niet

▼

?

Waren er uitzaaiingen gevonden bij diagnose?

▼

Nee

Ja, in de lymfeklieren

Ja, elders in het lichaam

Weet ik niet

Vorige

Toon de cijfers

Translation:

Disease-related data

- Year of diagnosis? (2015)
- Tumor stage at diagnosis? (I don't know)
  - Did the tumor spread to any nearby lymph nodes or other parts of the body? (No, yes in the nearby lymph nodes, yes to other parts of the body, I don't know)



# Borstkanker

## Algemeen

### Algemeen

Soorten Borstkanker >

Onderzoek Symptomen bij  
borstkanker >

De diagnose Risicofactoren van  
borstkanker >

Behandeling Erfelijke aanleg voor  
borstkanker >

Nieuwe Uitgezaaid Hormonen en  
borstkanker >

Gevolgen Dicht borstklierweefsel >

Niet meer Bevolkingsonderzoek  
borstkanker >

Over de Borstkanker

1

2

3

## Gegevens over uw ziekte bij diagnose

In welk jaar kreeg u de diagnose?

2015

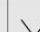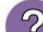

Wat was het stadium van de ziekte bij diagnose?

Weet ik niet

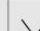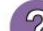

Waren er uitzaaiingen gevonden bij diagnose?

Ja, elders in het lichaam

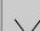

Vorige

Toon de cijfers

Translation:

### Disease-related data

- Year of diagnosis? (2015)
- Tumor stage at diagnosis? (I don't know)
  - Did the tumor spread to any nearby lymph nodes or other parts of the body? (yes to other parts of the body)



# Borstkanker

- Algemeen
- Soorten Borstkanker
- Onderzoek Symptomen bij borstkanker
- De diagnose Risicofactoren van borstkanker
- Behandeling Erfelijke aanleg voor borstkanker
- Uitgezaaid Hormonen en borstkanker
- Gevolgen Dicht borstklierweefsel
- Niet meer Bevolkingsonderzoek borstkanker
- Over de Overlevingscijfers borstkanker

1

2

3

## Resultaten

Op deze pagina ziet u cijfers over borstkanker. De cijfers die wij tonen, zijn gebaseerd op patiënten met de volgende kenmerken bij diagnose:

Geslacht: **Vrouw**

Diagnosejaar: **2015**

Uitzaaiingen: **Ja, elders in het lichaam**

Geboortjaar: **1969**

Stadium: **Onbekend**

Incidentiecijfers borstkanker

?

In **2015** kregen in totaal 14.597 vrouwen de diagnose borstkanker. In 2015 kregen 70 vrouwen de diagnose uitgezaaide borstkanker op 50-jarige leeftijd.

Overlevingscijfers borstkanker

?

Het is belangrijk dat u nadenkt over wat u wil weten. Deze cijfers kunnen ‘goed’ nieuws bevatten maar ook ‘slecht’ nieuws. Wat iemand wil weten, verschilt per persoon.

Vorige

Translation:

Results

On this page, you will see statistics about breast cancer. The statistics that we show are based on patients with the following characteristics:  
*Incidence rates breast cancer:* In 2015, in total 14.597 women were diagnosed with breast cancer. In 2015, 70 women like you were diagnosed with breast cancer that has spread to other parts of the body, aged 50 years old.  
*Survival statistics breast cancer*  
It is important that you think about what you want to know. These statistics may contain ‘good’ or ‘bad’ new. . What someone wants to know, differs per person.



# Borstkanker

- Algemeen
- Soorten Borstkanker
- Onderzoek Symptomen bij borstkanker
- De diagnose Risicofactoren van borstkanker
- Behandeling Erfelijke aanleg voor borstkanker
- Uitgezaaide kankers Hormonen en borstkanker
- Gevolgen Dicht borstklierweefsel
- Niet met de borstkanker
- Over de borstkanker
- Overlevingscijfers borstkanker

1

2

3

## Resultaten

Op deze pagina ziet u cijfers over borstkanker. De cijfers die wij tonen, zijn gebaseerd op patiënten met de volgende kenmerken bij diagnose:

Geslacht: **Vrouw**

Diagnosejaar: **2015**

Uitzaaiingen: **Ja, elders in het lichaam**

Geboortjaar: **1969**

Stadium: **Onbekend**

### Incidentiecijfers borstkanker

Met **incidentie** bedoelen we het aantal nieuwe gevallen met kanker in een bepaalde periode. Bij kanker geven we het aantal mensen dat in een bepaald jaar heeft gehoord dat ze kanker hebben.

In **2015** kregen in totaal 14.597 vrouwen de diagnose borstkanker. In 2015 kregen 70 vrouwen de diagnose uitgezaaide borstkanker op 50-jarige leeftijd.

Het is belangrijk dat u nadenkt over wat u wil weten. Deze cijfers kunnen ‘goed’ nieuws bevatten maar ook ‘slecht’ nieuws. Wat iemand wil weten, verschilt per persoon.

Vorige

Translation:  
With incidence rate we mean the number of new cancers of cancer occurring in a specified population in a certain period (typically in a specific year).

107

# Borstkanker

- Algemeen
- Soorten Borstkanker
- Onderzoek Symptomen bij borstkanker
- De diagnose Risicofactoren van borstkanker
- Behandeling Erfelijke aanleg voor borstkanker
- Uitgezaaid Hormonen en borstkanker
- Gevolgen Dicht borstklierweefsel
- Niet meer Bevolkingsonderzoek borstkanker
- Overlevingscijfers borstkanker

1

2

3

## Resultaten

Op deze pagina ziet u cijfers over borstkanker. De cijfers die wij tonen, zijn gebaseerd op patiënten met de volgende kenmerken bij diagnose:

Geslacht: **Vrouw**

Diagnosejaar: **2015**

Uitzaaiingen: **Ja, elders in het lichaam**

Geboortjaar: **1969**

Stadium: **Onbekend**

Incidentiecijfers borstkanker

In **2015** kregen in totaal 14.597 vrouwen de diagnose borstkanker. In 2015 kregen 70 vrouwen de diagnose uitgezaaide borstkanker op 50-jarige leeftijd.

Overlevingscijfers borstkanker

Het is belangrijk dat u nadenkt over wat u wil weten. Deze cijfers kunnen ‘goed’ nieuws bevatten maar ook ‘slecht’ nieuws. Wat iemand wil weten, verschilt per persoon.

Vorige

Translation:

**Results**

On this page, you will see statistics about breast cancer. The statistics that we show are based on patients with the following characteristics:

*Incidence rates breast cancer:* In 2015, in total 14.597 women were diagnosed with breast cancer. In 2015, 70 women like you were diagnosed with breast cancer that has spread to other parts of the body, aged 50 years old.

*Survival statistics breast cancer*

It is important that you think about what you want to know. These statistics may contain ‘good’ or ‘bad’ new. . What someone wants to know, differs per person.



# Borstkanker

- Algemeen
- Soorten Borstkanker >
- Onderzoek Symptomen bij borstkanker >
- De diagnose Risicofactoren van borstkanker >
- Behandeling Erfelijke aanleg voor borstkanker >
- Uitgezaaid Hormonen en borstkanker >
- Gevolgen Dicht borstklierweefsel >
- Niet meer Bevolkingsonderzoek borstkanker >
- Over de Overlevingscijfers borstkanker >



## Resultaten

### Overlevingscijfers borstkanker

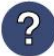

**Algemene cijfer:** 5 jaar na diagnose was ongeveer **88 procent** van de borstkanker patiënten nog in leven (88 van de 100 vrouwen).

**Gepersonaliseerde cijfer:** 5 jaar na diagnose was ongeveer **38 procent** van de patiënten met bovengenoemde kenmerken nog in leven (38 van de 100 vrouwen).

Het is belangrijk om te weten dat uw vooruitzichten nog steeds beter of slechter kunnen zijn dan de vooruitzichten voor deze specifieke groep. Bespreek uw vooruitzichten met uw arts.

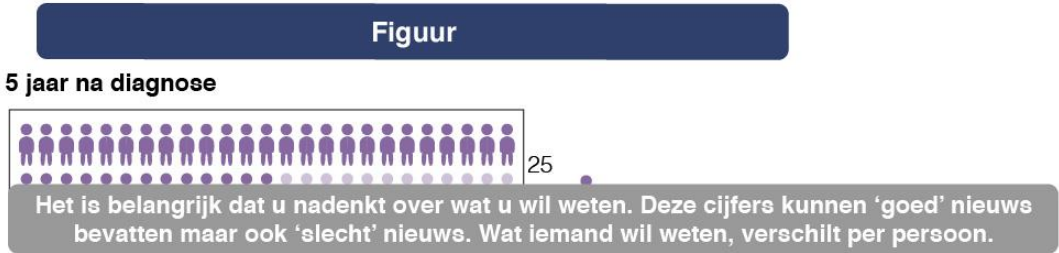

Vorige

Translation:

### Survival statistics breast cancer

*Generic statistic:* 5 years after diagnosis, about **88 percent** of these patients with breast cancer are alive (88 out of 100 women).

*Personalized statistic:* 5 years after diagnosis, about **38 percent** of these patients like you with breast cancer are alive (38 out of 100 women).

It is important to know that your prognosis may be better or worse than the prognosis of this specific group of patients. Please discuss your prognostic situation with your doctor.



# Borstkanker

## Algemeen

### Algemeen

Soorten Borstkanker >

Onderzoek Symptomen bij borstkanker >

De diagnose Risicofactoren van borstkanker >

Behandeling Erfelijke aanleg voor borstkanker >

Nieuwe uitzaaiingen Hormonen en borstkanker >

Gevolgen Dicht borstklierweefsel >

Niet meten Bevolkingsonderzoek borstkanker >

Over de overlevingscijfers borstkanker >

### Overlevingscijfers borstkanker

1

2

3

## Resultaten

### Overlevingscijfers borstkanker

Met **overleving** bedoelen we hoeveel mensen met een bepaalde vorm van kanker na een bepaalde periode nog in leven zijn. In dit geval laten we zien hoeveel vrouwen met de diagnose borstkanker 5 jaar na diagnose nog in leven zijn.

Om betrouwbare getallen te geven, moet er gerekend worden met grote aantallen patiënten die in het verleden borstkanker hebben gehad. De cijfers die wij hier tonen zullen gebaseerd zijn op patiënten met de bovengenoemde kenmerken die tussen 2012 en 2017 de diagnose borstkanker kregen.

**Algemene cijfer:** 5 jaar na diagnose was ongeveer **88 procent** van de borstkanker patiënten nog in leven (88 van de 100 vrouwen).

**Gepersonaliseerde cijfer:** 5 jaar na diagnose was ongeveer **38 procent** van de patiënten met bovengenoemde kenmerken nog in leven (38 van de 100 vrouwen).

Het is belangrijk dat u nadenkt over wat u wil weten. Deze cijfers kunnen 'goed' nieuws bevatten maar ook 'slecht' nieuws. Wat iemand wil weten, verschilt per persoon.

[Vorige](#)

#### Translation:

With survival we mean the percentage of people with cancer still alive after a particular amount of time. Survival statistics for cancer are usually written as 5 year survival. In order to provide you with reliable statistics we need to perform statistics on a large group of patients that have been diagnosed with breast cancer in the past. The statistics that we show here are performed on data from patients diagnosed between 2012 and 2017.



# Borstkanker

- Algemeen
- Soorten Borstkanker
- Onderzoek Symptomen bij borstkanker
- De diagnose Risicofactoren van borstkanker
- Behandeling Erfelijke aanleg voor borstkanker
- Uitgezaaid Hormonen en borstkanker
- Gevolgen Dicht borstklierweefsel
- Niet meer Bevolkingsonderzoek borstkanker
- Over de Overlevingscijfers borstkanker



## Resultaten

### Overlevingscijfers borstkanker



**Algemene cijfer:** 5 jaar na diagnose was ongeveer **88 procent** van de borstkanker patiënten nog in leven (88 van de 100 vrouwen).

**Gepersonaliseerde cijfer:** 5 jaar na diagnose was ongeveer **38 procent** van de patiënten met bovengenoemde kenmerken nog in leven (38 van de 100 vrouwen).

Het is belangrijk om te weten dat uw vooruitzichten nog steeds beter of slechter kunnen zijn dan de vooruitzichten voor deze specifieke groep. Bespreek uw vooruitzichten met uw arts.



Vorige

Translation:

### Survival statistics breast cancer

*Generic statistic:* 5 years after diagnosis, about **88 percent** of these patients with breast cancer are alive (88 out of 100 women).

*Personalized statistic:* 5 years after diagnosis, about **38 percent** of these patients like you with breast cancer are alive (38 out of 100 women).

It is important to know that your prognosis may be better or worse than the prognosis of this specific group of patients. Please discuss your prognostic situation with your doctor.



# Borstkanker

- Algemeen
- Soorten Borstkanker
- Onderzoek Symptomen bij borstkanker
- De diagnose Risicofactoren van borstkanker
- Behandeling Erfelijke aanleg voor borstkanker
- Nieuw onderzoek Hormonen en borstkanker
- Uitgezaaid Dicht borstklierweefsel
- Gevolgen Bevolkingsonderzoek borstkanker
- Niet meer Overlevingscijfers borstkanker

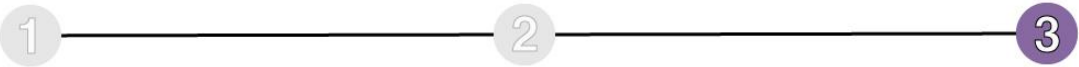

## Resultaten

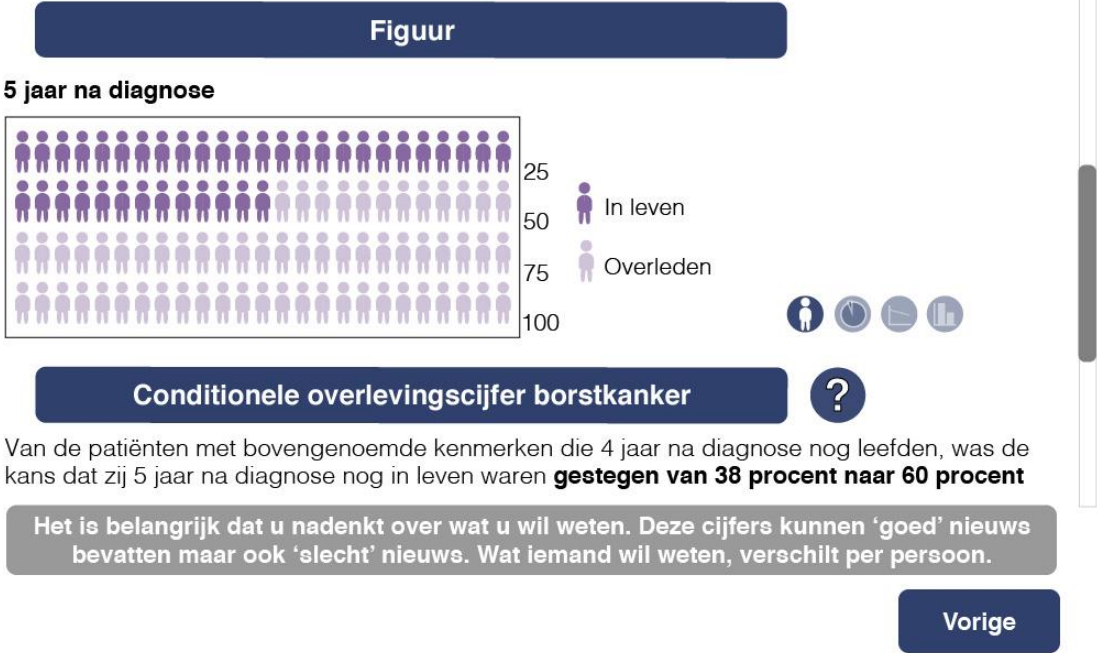

Translation:  
**Conditional survival statistics breast cancer**  
Of those patients like you who were still alive 4 years after diagnosis, the chance that they would still be alive 5 years after diagnosis increased from **38 percent to 60 percent** (60 out of 100 women).

# Borstkanker

- Algemeen
- Soorten Borstkanker >
- Onderzoek Symptomen bij borstkanker >
- De diagnose Risicofactoren van borstkanker >
- Behandeling Erfelijke aanleg voor borstkanker >
- Uitgezaaid Hormonen en borstkanker >
- Gevolgen Dicht borstklierweefsel >
- Niet meer Bevolkingsonderzoek borstkanker >
- Overlevingscijfers borstkanker >



## Resultaten

### Figuur

5 jaar na diagnose

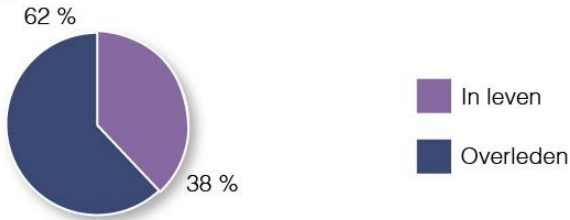

### Conditionele overlevingscijfer borstkanker

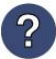

Van de patiënten met bovengenoemde kenmerken die 4 jaar na diagnose nog leefden, was de kans dat zij 5 jaar na diagnose nog in leven waren **gestegen van 38 procent naar 60 procent**

Het is belangrijk dat u nadenkt over wat u wil weten. Deze cijfers kunnen 'goed' nieuws bevatten maar ook 'slecht' nieuws. Wat iemand wil weten, verschilt per persoon.

Vorige

Translation:

### Conditional survival statistics breast cancer

Of those patients like you who were still alive 4 years after diagnosis, the chance that they would still be alive 5 years after diagnosis increased from **38 percent to 60 percent** (60 out of 100 women).



# Borstkanker

- Algemeen
- Soorten Borstkanker >
- Onderzoek Symptomen bij borstkanker >
- De diagnose Risicofactoren van borstkanker >
- Behandeling Erfelijke aanleg voor borstkanker >
- Uitgezaaid Hormonen en borstkanker >
- Gevolgen Dicht borstklierweefsel >
- Niet meer Over de Bevolkingsonderzoek borstkanker >
- Overlevingscijfers borstkanker >



## Resultaten

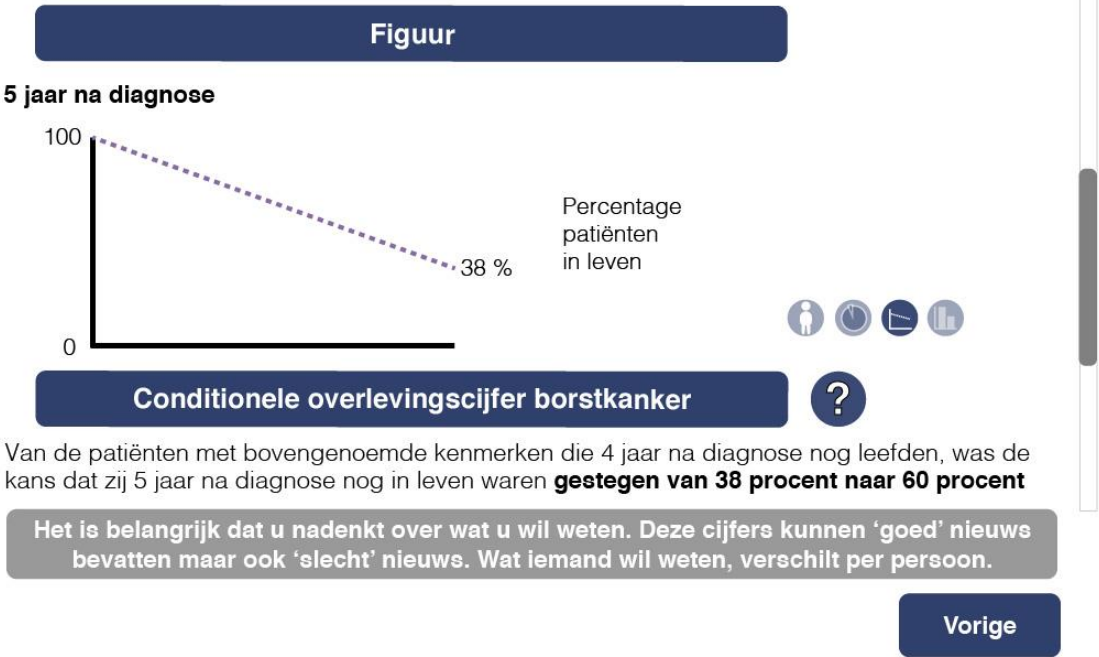

Translation:

Conditional survival statistics breast cancer

Of those patients like you who were still alive 4 years after diagnosis, the chance that they would still be alive 5 years after diagnosis increased from **38 percent to 60 percent** (60 out of 100 women).



# Borstkanker

- Algemeen
- Soorten Borstkanker
- Onderzoek Symptomen bij borstkanker
- De diagnose Risicofactoren van borstkanker
- Behandeling Erfelijke aanleg voor borstkanker
- Nieuw onderzoek Hormonen en borstkanker
- Uitgezaaid Dicht borstklierweefsel
- Gevolgen Bevolkingsonderzoek borstkanker
- Overlevingscijfers borstkanker

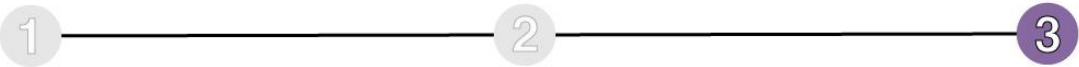

## Resultaten

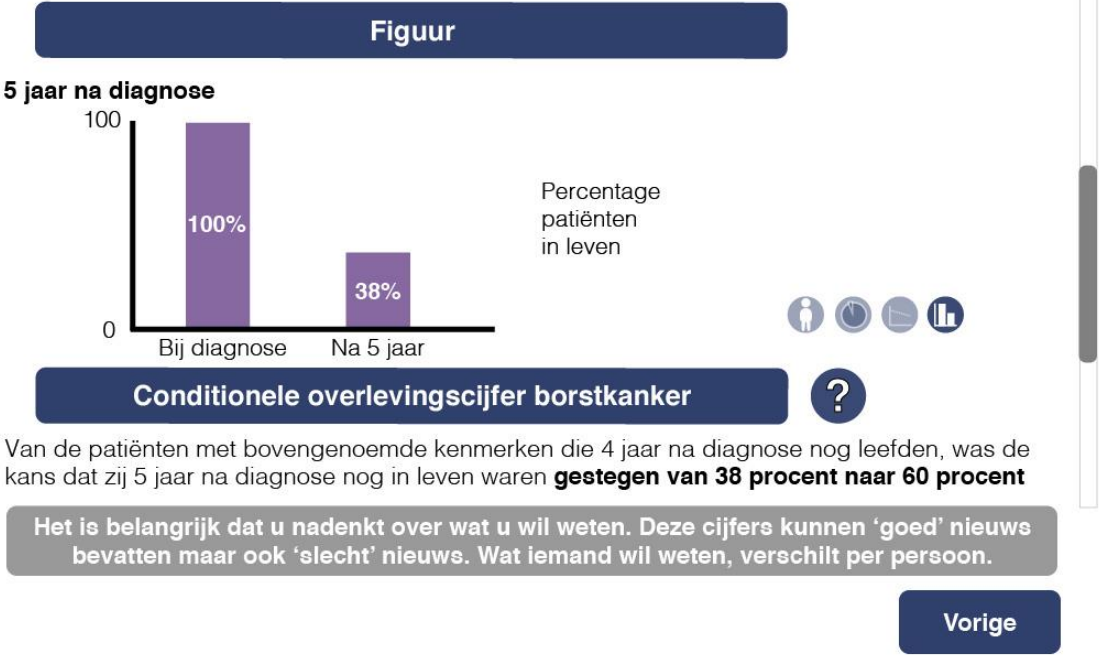

Translation:

### Conditional survival statistics breast cancer

Of those patients like you who were still alive 4 years after diagnosis, the chance that they would still be alive 5 years after diagnosis increased from **38 percent to 60 percent** (60 out of 100 women).



# Borstkanker

|                      |                                   |   |
|----------------------|-----------------------------------|---|
| Algemeen             | Algemeen                          |   |
| Soorten              | Borstkanker                       | > |
| Onderzoek            | Symptomen bij borstkanker         | > |
| De diagnose          | Risicofactoren van borstkanker    | > |
| Behandeling          | Erfelijke aanleg voor borstkanker | > |
| Nieuwe behandelingen | Hormonen en borstkanker           | > |
| Uitgezaaid           | Dicht borstklierweefsel           | > |
| Gevolgen             | Bevolkingsonderzoek borstkanker   | > |
| Niet meer            |                                   |   |
| Over de              |                                   |   |
|                      | Overlevingscijfers borstkanker    | > |



## Resultaten

### Conditionele overlevingscijfer borstkanker

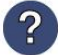

Van de patiënten met bovengenoemde kenmerken die 4 jaar na diagnose nog leefden, was de kans dat zij 5 jaar na diagnose nog in leven waren **gestegen van 38 procent naar 60 procent** (60 van de 100 vrouwen).

### Toelichting op de cijfers

Bovenstaande cijfers zijn afkomstig uit de Nederlandse Kankerregistratie (NKR). Deze database bevat betrouwbare en objectieve gegevens over het voorkomen en de overleving van alle diagnoses kanker in Nederland. Het Integraal Kankercentrum Nederland (IKNL) beheert deze database.

Bovenstaande cijfers zijn tot en met 2017. Meer recente cijfers zijn op dit moment niet beschikbaar. De veranderingen per jaar zijn meestal gering. Bovenstaande cijfers kunnen een indruk geven voor latere jaren.

Het is belangrijk dat u nadenkt over wat u wil weten. Deze cijfers kunnen 'goed' nieuws bevatten maar ook 'slecht' nieuws. Wat iemand wil weten, verschilt per persoon.

Vorige

Translation:

### About the statistics

The statistics that we show are based on data from the Netherlands Cancer Registry (NCR). This database contains reliable and objective data about the prevalence and survival of all cancer patients in the Netherlands. The Netherlands Comprehensive Cancer Organisation hosts this database.

The statistics that we showed are until 2017. More recent statistics are currently not available. However, annual changes are typically limited. The statistics provided here may therefore give an impression for future years.

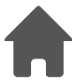

# Borstkanker

|                       |                                   |   |
|-----------------------|-----------------------------------|---|
| Algemeen              | Algemeen                          |   |
| Soorten               | Borstkanker                       | > |
| Onderzoek             | Symptomen bij borstkanker         | > |
| De diagnose           | Risicofactoren van borstkanker    | > |
| Behandeling           | Erfelijke aanleg voor borstkanker | > |
| Nieuwe ontwikkelingen | Hormonen en borstkanker           | > |
| Uitgezaaid            | Dicht borstklierweefsel           | > |
| Gevolgen              | Bevolkingsonderzoek borstkanker   | > |
| Niet meer             | Overlevingscijfers borstkanker    | > |

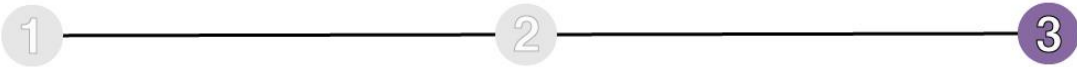

## Resultaten

### Conditionele overlevingscijfer borstkanker

Veel kankerpatiënten die hun ziekte reeds enige tijd hebben overleefd, willen graag weten wat hun vooruitzichten zijn gelet op het feit dat ze nog (steeds) in leven zijn. Dit wordt 'conditionele overleving' genoemd. De overlevingscijfers worden vaak beter met ieder jaar dat de patiënt overleeft.

Van de patiënten met bovengenoemde kenmerken die 4 jaar na diagnose nog leefden, was de kans dat zij 5 jaar na diagnose nog in leven waren **gestegen van 38 procent naar 60 procent** (60 van de 100 vrouwen).

### Toelichting op de cijfers

Bovenstaande cijfers zijn afkomstig uit de Nederlandse Kankerregistratie (NKR). Deze database bevat betrouwbare en objectieve gegevens over het voorkomen en de overleving van alle diagnoses kanker in Nederland. Het Integraal Kankercentrum Nederland (IKNL) beheert deze database.

Het is belangrijk dat u nadenkt over wat u wil weten. Deze cijfers kunnen 'goed' nieuws bevatten maar ook 'slecht' nieuws. Wat iemand wil weten, verschilt per persoon.

Vorige

Translation:  
Many patients with cancer who have survived for a couple of years want to know the chance that they will survive another x years (given that they are still alive). We call this conditional survival. In general, for cancer patients who have already survived a number of years, survival expectations at diagnosis are typically more favorable.



# Borstkanker

## Algemeen

Soorten Borstkanker >

Onderzoek Symptomen bij  
borstkanker >

De diagnose Risicofactoren van  
borstkanker >

Behandeling

Nieuwe Erfelijke aanleg voor  
borstkanker >

Uitgezaagd

Gevolgen Hormonen en  
borstkanker >

Niet meten Dicht borstklierweefsel >

Over de Bevolkingsonderzoek  
borstkanker >

**Overlevingscijfers  
borstkanker** >

1

2

3

## Resultaten

### Conditionele overlevingscijfer borstkanker

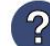

Van de patiënten met bovengenoemde kenmerken die 4 jaar na diagnose nog leefden, was de kans dat zij 5 jaar na diagnose nog in leven waren **gestegen van 38 procent naar 60 procent** (60 van de 100 vrouwen).

### Toelichting op de cijfers

Bovenstaande cijfers zijn afkomstig uit de Nederlandse Kankerregistratie (NKR). Deze database bevat betrouwbare en objectieve gegevens over het voorkomen en de overleving van alle diagnoses kanker in Nederland. Het Integraal Kankercentrum Nederland (IKNL) beheert deze database.

Bovenstaande cijfers zijn tot en met 2017. Meer recente cijfers zijn op dit moment niet beschikbaar. De veranderingen per jaar zijn meestal gering. Bovenstaande cijfers kunnen een indruk geven voor latere jaren.

Het is belangrijk dat u nadenkt over wat u wil weten. Deze cijfers kunnen 'goed' nieuws bevatten maar ook 'slecht' nieuws. Wat iemand wil weten, verschilt per persoon.

Vorige



Supplement: Multimedia Appendix 3 [file cancer_v7i4e25659_app3.pdf]
